# Supplementary material for: Cooperative Cu/Pd-catalyzed borocarbonylation of ethylene
Source: Royal Society of Chemistry journal article supplement (doi:10.1039/d2cc04907d), 2022-01-01

## *Supporting Information*

### **Cooperative Cu/Pd-Catalyzed Borocarbonylation of Ethylene**

Yang Yuan,<sup>a</sup> Jian-Xing Xu,<sup>a</sup> and Xiao-Feng Wu<sup>\*a,b</sup>

<sup>a</sup>Dalian National Laboratory for Clean Energy, Dalian Institute of Chemical Physics, Chinese Academy of Science, 116023 Dalian, Liaoning, China.

<sup>b</sup>Leibniz-Institut für Katalyse e.V., Albert-Einstein-Straße 29a, 18059 Rostock, Germany.

### **Contents**

|                                                |     |
|------------------------------------------------|-----|
| 1. General Information.....                    | S2  |
| 2. General Procedures.....                     | S3  |
| 2.1 General Procedure .....                    | S3  |
| 2.2 Procedure for 1.0 mmol scale reaction..... | S4  |
| 2.3 General for Compound 4.....                | S4  |
| 2.4 Procedure for Compound 5.....              | S5  |
| 4. Characterization Data .....                 | S6  |
| 5. NMR Spectra.....                            | S20 |

## 1. General information

Unless otherwise noted, all reactions were carried out under carbon monoxide (CO) or nitrogen atmosphere. All reagents were from commercial sources and used as received without further purification. All solvents were dried by standard techniques and distilled prior to use. Column chromatography was performed on silica gel (200-300 meshes) using petroleum ether (bp. 60~90 °C), dichloromethane and ethyl acetate as eluent. All NMR spectra were recorded at ambient temperature using Bruker Avance III 400 MHz NMR, Bruker Avance III HD 700 MHz NMR spectrometers. <sup>1</sup>H NMR chemical shifts are reported relative to TMS and were referenced via residual proton resonances of the corresponding deuterated solvent (CDCl<sub>3</sub>: 7.26 ppm; d<sub>6</sub>-DMSO: 2.50 ppm) whereas <sup>13</sup>C{<sup>1</sup>H} NMR spectra are reported relative to TMS via the carbon signals of the deuterated solvent (CDCl<sub>3</sub>: 77.0 ppm; d<sub>6</sub>-DMSO: 39.5 ppm. Data for <sup>1</sup>H are reported as follows: chemical shift (δ ppm), multiplicity (s = singlet, d = doublet, t = triplet, q = quartet, quint = quintet, m = multiplet, br = broad), coupling constant (Hz), and integration. All <sup>13</sup>C NMR spectra were broad-band <sup>1</sup>H decoupled. All reactions were monitored by GC-FID or NMR analysis, GC-yields were calculated using hexadecane as internal standard. All measurements were carried out at room temperature unless otherwise stated. HRMS data was obtained with Micromass HPLC-Q-TOF mass spectrometer (ESI) or Agilent 6540 Accurate-MS spectrometer (Q-TOF).

Because of the high toxicity of carbon monoxide, all the reactions should be performed in an autoclave. The laboratory should be well-equipped with a CO detector and alarm system.

## 2. General Procedures

### 2.1 General Procedure

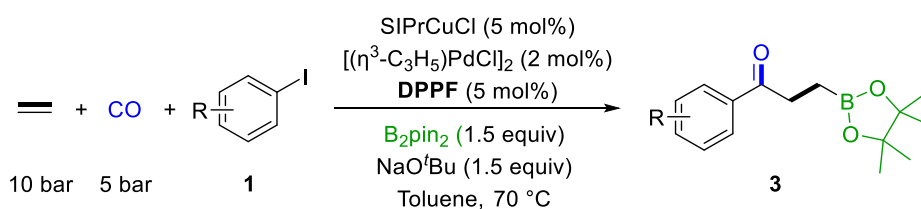

A vial (4 mL) was charged with DPPF (5.0 mol%), [(η<sup>3</sup>-C<sub>3</sub>H<sub>5</sub>)PdCl]<sub>2</sub> (2.0 mol%), SIPrCuCl (5.0 mol%), B<sub>2</sub>pin<sub>2</sub> (76.2 mg, 1.5 equiv), NaO<sup>t</sup>Bu (28.8 mg, 1.5 equiv), and a stirring bar. The vial was closed by PTFE/white rubber septum (Wheaton 13 mm Septa) and phenolic cap and connected with atmosphere with a needle. The vial was evacuated under vacuum and recharged with argon for three times. Then, toluene (1.0 mL) was injected under argon by using a syringe. After that **1** (0.2 mmol, 1.0 equiv) was added, and the vial (or several vials) was placed in an alloy plate, which was transferred into a 300 mL autoclave of the 4560 series from Parr Instruments. After flushing the autoclave three times with CO, a pressure of 5 bar of CO and 10 bar of ethylene were adjusted at ambient temperature. Then, the reaction was performed for 24 h at 70 °C. After the reaction was complete, the autoclave was cooled down with ice water to room temperature and the pressure was released carefully. The reaction was diluted with EA (ethyl acetate) and filtered through a pad of silica gel (a pipette with about 3 cm silica gel). The filtrate was concentrated under reduced pressure and the residue was directly purified by column chromatography to afford the corresponding products **3**.

**Note:** Column chromatography should be performed quickly to prevent product decomposition on silica. (We typically aim to complete the column in 10-15 min for a reaction on this scale.)

## 2.2 Procedure for 1.0 mmol scale reaction

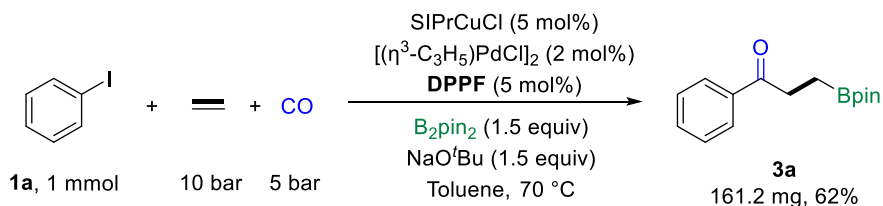

A vial (4 mL) was charged with DPPF (5.0 mol%), [( $\eta^3$ -C<sub>3</sub>H<sub>5</sub>)PdCl]<sub>2</sub> (2.0 mol%), SIPrCuCl (5.0 mol%), B<sub>2</sub>pin<sub>2</sub> (381 mg, 1.5 equiv), NaO<sup>t</sup>Bu (144 mg, 1.5 equiv), and a stirring bar. The vial was closed by PTFE/white rubber septum (Wheaton 13 mm Septa) and phenolic cap and connected with atmosphere with a needle. The vial was evacuated under vacuum and recharged with argon for three times. Then, toluene (1.0 mL) was injected under argon by using a syringe. After that **1** (1 mmol, 1.0 equiv) was added, and the vial (or several vials) was placed in an alloy plate, which was transferred into a 300 mL autoclave of the 4560 series from Parr Instruments. After flushing the autoclave three times with CO, a pressure of 5 bar of CO and 10 bar of ethylene were adjusted at ambient temperature. Then, the reaction was performed for 24 h at 70 °C. After the reaction was complete, the autoclave was cooled down with ice water to room temperature and the pressure was released carefully. The reaction was diluted with EA (ethyl acetate) and filtered through a pad of silica gel. The filtrate was concentrated under reduced pressure and the residue was directly purified by column chromatography to afford the corresponding products **3** as a slight yellow oil in 62% yield (161.2 mg).

## 2.3 Procedure for Compound 4

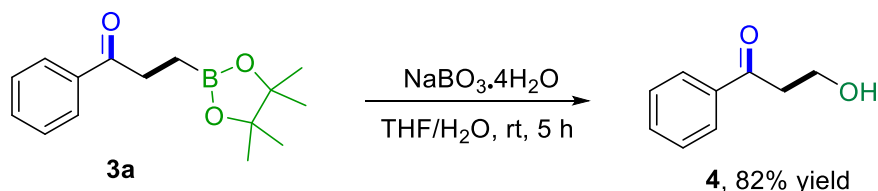

A Schlenk tube with a magnetic stir bar was charged with **3a** (26.1 mg, 0.1 mmol, 1.0 equiv), NaBO<sub>3</sub>·4H<sub>2</sub>O (101 mg, 0.4 mmol, 4.0 equiv), then THF (0.5 mL) and H<sub>2</sub>O (0.5 mL) were added. The reaction allowed to stir at room temperature for 5 h and

extracted with EtOAc (3 x 2 mL). The combined organic phase was dried over Na<sub>2</sub>SO<sub>4</sub> and concentrated. The residue was purified by flash chromatography (PE/EA= 5/1) to give **4** as a colorless oil (12.3 mg, 82% yield). <sup>1</sup>H NMR (700 MHz, CDCl<sub>3</sub>) δ 7.96 (d, *J* = 8.0 Hz, 2H), 7.58 (t, *J* = 7.3 Hz, 1H), 7.47 (t, *J* = 7.7 Hz, 2H), 4.03 (t, *J* = 5.3 Hz, 2H), 3.23 (t, *J* = 5.4 Hz, 2H), 2.74 (s, 1H). <sup>13</sup>C NMR (176 MHz, CDCl<sub>3</sub>) δ 200.5, 136.7, 133.6, 128.7, 128.1, 58.1, 40.4. HRMS (ESI-TOF) *m/z*: [M+H]<sup>+</sup> Calcd for C<sub>9</sub>H<sub>11</sub>O 151.0754; Found: 151.0749.

## 2.4 Procedure for Compound 5

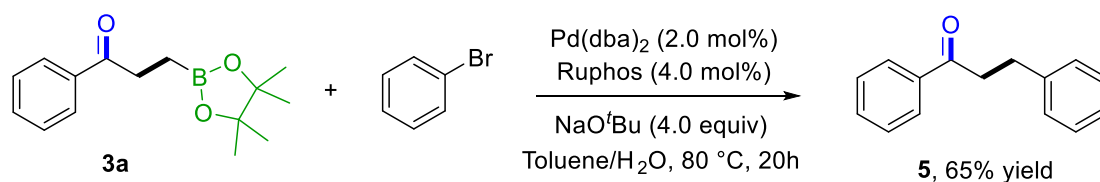

Compound **3a** (39 mg, 0.15 mmol, 1.0 equiv), bromobenzene (28.3 mg, 0.18 mmol, 1.2 equiv), NaO<sup>t</sup>Bu (57.6 mg, 0.6 mmol, 4.0 equiv), Pd(dba)<sub>2</sub> (2.0 mol%) Ruphos (4.0 mol%), toluene (0.5 mL) and H<sub>2</sub>O (50 μL) were added to a Schlenk flask. The mixture was degassed with N<sub>2</sub> three times. Then the reaction was heated at 80 °C for 20 h. After the reaction mixture was cooled to room temperature, EA (10 mL) and H<sub>2</sub>O (5 mL) were added, and the organic layer was separated. The aqueous layer was extracted with Et<sub>2</sub>O (10 mL × 2). The combined organic phases were washed with brine, and dried over anhydrous Na<sub>2</sub>SO<sub>4</sub>. The residue was purified by flash chromatography (PE/EA= 50/1) to give **5** as a white solid (20.5 mg, 65% yield). <sup>1</sup>H NMR (400 MHz, CDCl<sub>3</sub>) δ 8.06 – 7.87 (m, 2H), 7.56 (t, *J* = 7.4 Hz, 1H), 7.45 (t, *J* = 7.6 Hz, 2H), 7.34 – 7.12 (m, 5H), 3.39 – 3.20 (m, 2H), 3.15 – 2.96 (m, 2H). <sup>13</sup>C NMR (101 MHz, CDCl<sub>3</sub>) δ 199.3, 141.3, 136.9, 133.1, 128.6, 128.6, 128.4, 128.1, 126.2, 40.5, 30.2. HRMS (ESI-TOF) *m/z*: [M+H]<sup>+</sup> Calcd for C<sub>15</sub>H<sub>15</sub>O 211.1117; Found: 211.1109.

## 4. Characterization Data

**Note:** the carbon directly attached to the boron atom was not detected due to quadrupolar relaxation.

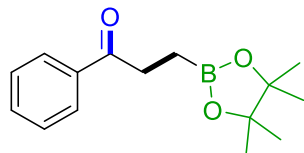

### 1-Phenyl-3-(4,4,5,5-tetramethyl-1,3,2-dioxaborolan-2-yl)propan-1-one (3a)

35.8 mg, 69% yield, slight yellow oil. Eluent: pentane/ethyl acetate = 20/1.

$^1\text{H NMR}$  (700 MHz,  $\text{CDCl}_3$ )  $\delta$  7.97 (d,  $J = 7.5$  Hz, 2H), 7.53 (t,  $J = 7.5$  Hz, 1H), 7.44 (t,  $J = 7.5$  Hz, 2H), 3.15 (t,  $J = 7.0$  Hz, 2H), 1.25 (s, 12H), 1.08 (t,  $J = 7.0$  Hz, 2H).

$^{13}\text{C NMR}$  (176 MHz,  $\text{CDCl}_3$ )  $\delta$  200.6, 137.0, 132.8, 128.5, 128.0, 83.1, 33.7, 24.8.

**HRMS** (ESI-TOF)  $m/z$ :  $[\text{M}+\text{H}]^+$  Calcd for  $\text{C}_{15}\text{H}_{22}\text{BO}_3$  261.1665; Found: 261.1664.

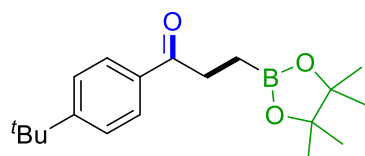

### 1-(4-(*tert*-Butyl)phenyl)-3-(4,4,5,5-tetramethyl-1,3,2-dioxaborolan-2-yl)propan-1-one (3b)

45.5 mg, 72% yield, slight yellow oil. Eluent: pentane/ethyl acetate = 20/1.

$^1\text{H NMR}$  (700 MHz,  $\text{CDCl}_3$ )  $\delta$  7.84 (d,  $J = 8.5$  Hz, 2H), 7.38 (d,  $J = 8.5$  Hz, 2H), 3.06 (t,  $J = 7.0$  Hz, 2H), 1.26 (s, 9H), 1.18 (s, 12H), 0.99 (t,  $J = 7.0$  Hz, 2H).

$^{13}\text{C NMR}$  (176 MHz,  $\text{CDCl}_3$ )  $\delta$  199.2, 155.3, 133.40, 126.9, 124.4, 82.0, 34.0, 32.6, 30.1, 23.8.

$^{11}\text{B NMR}$  (128 MHz,  $\text{CDCl}_3$ )  $\delta$  34.21.

**HRMS** (ESI-TOF)  $m/z$ :  $[\text{M}+\text{H}]^+$  Calcd for  $\text{C}_{19}\text{H}_{30}\text{BO}_3$  317.2291; Found: 317.2286.

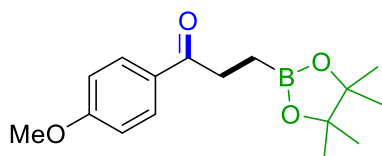

**1-(4-Methoxyphenyl)-3-(4,4,5,5-tetramethyl-1,3,2-dioxaborolan-2-yl)propan-1-one (3c)**

38.9 mg, 67% yield, slight yellow oil. Eluent: pentane/ethyl acetate = 15/1.

$^1\text{H NMR}$  (700 MHz,  $\text{CDCl}_3$ )  $\delta$  7.95 (d,  $J = 8.5$  Hz, 2H), 6.92 (d,  $J = 8.5$  Hz, 2H), 3.86 (s, 3H), 3.10 (t,  $J = 7.0$  Hz, 2H), 1.25 (s, 12H), 1.06 (t,  $J = 7.0$  Hz, 2H).

$^{13}\text{C NMR}$  (176 MHz,  $\text{CDCl}_3$ )  $\delta$  199.1, 163.2, 130.2, 113.6, 83.1, 55.4, 33.3, 24.8.

$^{11}\text{B NMR}$  (128 MHz,  $\text{CDCl}_3$ )  $\delta$  34.30.

**HRMS** (ESI-TOF)  $m/z$ :  $[\text{M}+\text{H}]^+$  Calcd for  $\text{C}_{16}\text{H}_{24}\text{BO}_4$  291.1771; Found: 291.1772.

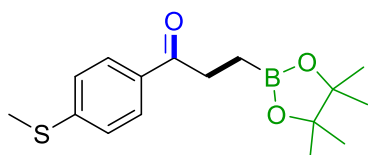

**1-(4-(Methylthio)phenyl)-3-(4,4,5,5-tetramethyl-1,3,2-dioxaborolan-2-yl)propan-1-one (3d)**

38.6 mg, 63% yield, colorless sticky oil. Eluent: pentane/ethyl acetate = 8/1.

$^1\text{H NMR}$  (700 MHz,  $\text{CDCl}_3$ )  $\delta$  7.88 (d,  $J = 8.5$  Hz, 2H), 7.25 (d,  $J = 8.5$  Hz, 2H), 3.11 (t,  $J = 7.0$  Hz, 2H), 2.51 (s, 3H), 1.25 (s, 12H), 1.06 (t,  $J = 7.0$  Hz, 2H).

$^{13}\text{C NMR}$  (176 MHz,  $\text{CDCl}_3$ )  $\delta$  199.6, 145.3, 133.3, 128.4, 124.9, 83.1, 33.4, 25.0, 24.8, 14.9.

$^{11}\text{B NMR}$  (128 MHz,  $\text{CDCl}_3$ )  $\delta$  34.53.

**HRMS** (ESI-TOF)  $m/z$ :  $[\text{M}+\text{H}]^+$  Calcd for  $\text{C}_{16}\text{H}_{24}\text{BO}_3\text{S}$  307.1542; Found: 307.1549.

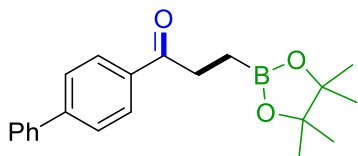

**1-([1,1'-Biphenyl]-4-yl)-3-(4,4,5,5-tetramethyl-1,3,2-dioxaborolan-2-yl)propan-1-one (3e)**

51.8 mg, 77% yield, pale yellow solid. Eluent: pentane/ethyl acetate = 15/1.

$^1\text{H NMR}$  (700 MHz,  $\text{CDCl}_3$ )  $\delta$  8.04 (d,  $J = 7.5$  Hz, 2H), 7.66 (d,  $J = 7.5$  Hz, 2H), 7.62 (d,  $J = 7.5$  Hz, 2H), 7.46 (t,  $J = 7.5$  Hz, 2H), 7.39 (t,  $J = 7.5$  Hz, 1H), 3.18 (t,  $J = 7.0$  Hz, 2H), 1.26 (s, 12H), 1.10 (t,  $J = 7.0$  Hz, 2H).

$^{13}\text{C NMR}$  (176 MHz,  $\text{CDCl}_3$ )  $\delta$  200.2, 145.4, 140.0, 135.7, 128.9, 128.6, 128.1, 127.3, 127.1, 83.1, 33.8, 25.1, 24.8.

**HRMS** (ESI-TOF)  $m/z$ :  $[\text{M}+\text{H}]^+$  Calcd for  $\text{C}_{21}\text{H}_{26}\text{BO}_3$  337.1979; Found: 337.1985.

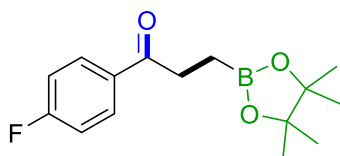

**1-(4-Fluorophenyl)-3-(4,4,5,5-tetramethyl-1,3,2-dioxaborolan-2-yl)propan-1-one (3f)**

33.9 mg, 61% yield, colorless oil. Eluent: pentane/ethyl acetate = 10/1.

$^1\text{H NMR}$  (700 MHz,  $\text{CDCl}_3$ )  $\delta$  8.06 – 7.94 (m, 2H), 7.11 (t,  $J = 8.5$  Hz, 2H), 3.12 (t,  $J = 6.9$  Hz, 2H), 1.25 (s, 12H), 1.07 (t,  $J = 6.9$  Hz, 2H).

$^{13}\text{C NMR}$  (176 MHz,  $\text{CDCl}_3$ )  $\delta$  199.0, 165.6 (d,  $J = 253.9$  Hz), 133.4, 130.6 (d,  $J = 9.2$  Hz), 115.5 (d,  $J = 21.8$  Hz), 83.2, 33.6, 24.8.

$^{11}\text{B NMR}$  (128 MHz,  $\text{CDCl}_3$ )  $\delta$  34.10.

**HRMS** (ESI-TOF)  $m/z$ :  $[\text{M}+\text{H}]^+$  Calcd for  $\text{C}_{15}\text{H}_{21}\text{BO}_3\text{F}$  279.1571; Found: 279.1570.



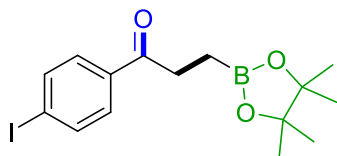

**1-(4-Iodophenyl)-3-(4,4,5,5-tetramethyl-1,3,2-dioxaborolan-2-yl)propan-1-one**

**(3g)**

37.0 mg, 48% yield, yellow oil. Eluent: pentane/ethyl acetate = 15/1.

$^1\text{H NMR}$  (700 MHz,  $\text{CDCl}_3$ )  $\delta$  7.81 (d,  $J = 8.5$  Hz, 2H), 7.68 (d,  $J = 8.5$  Hz, 2H), 3.10 (t,  $J = 7.0$  Hz, 2H), 1.28 – 1.23 (m, 12H), 1.07 (t,  $J = 7.0$  Hz, 2H).

$^{13}\text{C NMR}$  (176 MHz,  $\text{CDCl}_3$ )  $\delta$  199.9, 137.8, 136.2, 129.5, 100.6, 83.2, 33.6, 24.8.

$^{11}\text{B NMR}$  (128 MHz,  $\text{CDCl}_3$ )  $\delta$  33.72.

**HRMS** (ESI-TOF)  $m/z$ :  $[\text{M}+\text{H}]^+$  Calcd for  $\text{C}_{15}\text{H}_{22}\text{BO}_3\text{I}$  386.0631; Found: 386.0627.

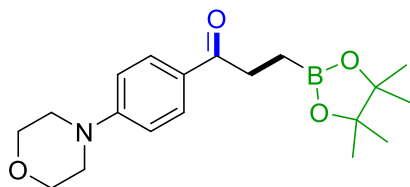

**1-(4-Morpholinophenyl)-3-(4,4,5,5-tetramethyl-1,3,2-dioxaborolan-2-yl)propan-1-one (3h)**

32.5 mg, 47% yield, white solid. Eluent: pentane/ethyl acetate = 3/1.

$^1\text{H NMR}$  (700 MHz,  $\text{CDCl}_3$ )  $\delta$  7.90 (d,  $J = 8.5$  Hz, 2H), 6.85 (d,  $J = 8.5$  Hz, 2H), 3.94 – 3.76 (m, 4H), 3.37 – 3.23 (m, 4H), 3.07 (t,  $J = 7.0$  Hz, 2H), 1.25 (s, 12H), 1.04 (t,  $J = 7.0$  Hz, 2H).

$^{13}\text{C NMR}$  (176 MHz,  $\text{CDCl}_3$ )  $\delta$  198.9, 154.1, 129.9, 127.9, 113.4, 83.0, 66.6, 47.7, 33.1, 24.8.

$^{11}\text{B NMR}$  (128 MHz,  $\text{CDCl}_3$ )  $\delta$  34.87.

**HRMS** (ESI-TOF)  $m/z$ :  $[\text{M}+\text{H}]^+$  Calcd for  $\text{C}_{19}\text{H}_{29}\text{BNO}_4$  346.2193; Found: 346.2198.

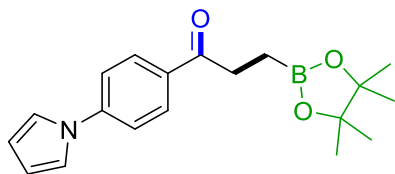

**1-(4-(1H-Pyrrol-1-yl)phenyl)-3-(4,4,5,5-tetramethyl-1,3,2-dioxaborolan-2-yl)propan-1-one (3i)**

38.4 mg, 59% yield, slight yellow oil. Eluent: pentane/ethyl acetate = 5/1.

$^1\text{H NMR}$  (700 MHz,  $\text{CDCl}_3$ )  $\delta$  8.04 (d,  $J = 8.5$  Hz, 2H), 7.44 (d,  $J = 8.5$  Hz, 2H), 7.17 (d,  $J = 20.5$  Hz, 2H), 6.39 (d,  $J = 15.5$  Hz, 2H), 3.15 (t,  $J = 7.0$  Hz, 2H), 1.26 (s, 12H), 1.09 (t,  $J = 7.0$  Hz, 2H).

$^{13}\text{C NMR}$  (176 MHz,  $\text{CDCl}_3$ )  $\delta$  199.2, 143.8, 133.9, 129.8, 119.4, 119.0, 111.5, 83.2, 33.6, 25.0, 24.8.

$^{11}\text{B NMR}$  (128 MHz,  $\text{CDCl}_3$ )  $\delta$  34.16.

**HRMS** (ESI-TOF)  $m/z$ :  $[\text{M}+\text{H}]^+$  Calcd for  $\text{C}_{19}\text{H}_{25}\text{BNO}_3$  326.1931; Found: 326.1930.

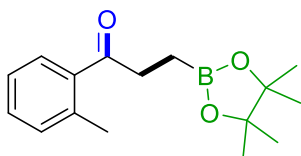

**3-(4,4,5,5-Tetramethyl-1,3,2-dioxaborolan-2-yl)-1-(o-tolyl)propan-1-one (3j)**

38.9 mg, 71% yield, colorless oil. Eluent: pentane/ethyl acetate = 20/1.

$^1\text{H NMR}$  (700 MHz,  $\text{CDCl}_3$ )  $\delta$  7.56 (d,  $J = 7.5$  Hz, 1H), 7.26 (t,  $J = 7.5$  Hz, 1H), 7.16 (dd,  $J = 13.5, 7.5$  Hz, 2H), 2.98 (t,  $J = 7.0$  Hz, 2H), 2.40 (s, 3H), 1.18 (s, 12H), 0.98 (t,  $J = 7.0$  Hz, 2H).

$^{13}\text{C NMR}$  (176 MHz,  $\text{CDCl}_3$ )  $\delta$  204.9, 138.3, 137.7, 131.7, 130.9, 128.2, 125.6, 83.1, 36.7, 25.0, 24.8, 21.1.

$^{11}\text{B NMR}$  (128 MHz,  $\text{CDCl}_3$ )  $\delta$  34.12.

**HRMS** (ESI-TOF)  $m/z$ :  $[\text{M}+\text{H}]^+$  Calcd for  $\text{C}_{16}\text{H}_{24}\text{BO}_3$  275.1821; Found: 275.1825.

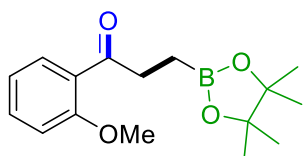

**1-(2-Methoxyphenyl)-3-(4,4,5,5-tetramethyl-1,3,2-dioxaborolan-2-yl)propan-1-one (3k)**

40.6 mg, 70% yield, slight yellow oil. Eluent: pentane/ethyl acetate = 15/1.

$^1\text{H NMR}$  (700 MHz,  $\text{CDCl}_3$ )  $\delta$  7.69 (dd,  $J = 7.5, 1.5$  Hz, 1H), 7.48 – 7.37 (m, 1H), 7.09 – 6.87 (m, 2H), 3.88 (s, 3H), 3.13 (t,  $J = 7.0$  Hz, 2H), 1.25 (s, 12H), 1.00 (t,  $J = 7.0$  Hz, 2H).

$^{13}\text{C NMR}$  (176 MHz,  $\text{CDCl}_3$ )  $\delta$  202.9, 158.6, 133.1, 130.3, 128.3, 120.5, 111.5, 83.0, 55.5, 39.0, 25.0, 24.8.

$^{11}\text{B NMR}$  (128 MHz,  $\text{CDCl}_3$ )  $\delta$  33.99.

**HRMS** (ESI-TOF)  $m/z$ :  $[\text{M}+\text{H}]^+$  Calcd for  $\text{C}_{16}\text{H}_{24}\text{BO}_4$  291.1771; Found: 291.1779.

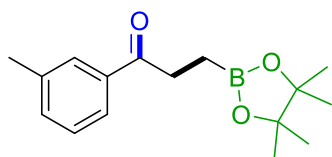

**3-(4,4,5,5-Tetramethyl-1,3,2-dioxaborolan-2-yl)-1-(m-tolyl)propan-1-one (3m)**

39.5 mg, 72% yield, colorless oil. Eluent: pentane/ethyl acetate = 20/1.

$^1\text{H NMR}$  (700 MHz,  $\text{CDCl}_3$ )  $\delta$  7.78 – 7.60 (m, 2H), 7.33 – 7.22 (m, 2H), 3.06 (t,  $J = 7.0$  Hz, 2H), 2.33 (s, 3H), 1.18 (s, 12H), 0.99 (t,  $J = 7.0$  Hz, 2H).

$^{13}\text{C NMR}$  (176 MHz,  $\text{CDCl}_3$ )  $\delta$  200.8, 138.2, 137.0, 133.5, 128.5, 128.3, 125.2, 83.1, 33.7, 25.0, 24.8, 21.4.

**HRMS** (ESI-TOF)  $m/z$ :  $[\text{M}+\text{H}]^+$  Calcd for  $\text{C}_{16}\text{H}_{24}\text{BO}_3$  275.1821; Found: 275.1821.

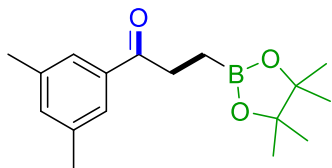

**1-(3,5-Dimethylphenyl)-3-(4,4,5,5-tetramethyl-1,3,2-dioxaborolan-2-yl)propan-1-one (3n)**

36.9 mg, 64% yield, colorless oil. Eluent: pentane/ethyl acetate = 20/1.

$^1\text{H NMR}$  (700 MHz,  $\text{CDCl}_3$ )  $\delta$  7.57 (s, 2H), 7.17 (s, 1H), 3.12 (t,  $J = 7.0$  Hz, 2H), 2.36 (s, 6H), 1.26 (s, 12H), 1.06 (t,  $J = 7.0$  Hz, 2H).

$^{13}\text{C NMR}$  (176 MHz,  $\text{CDCl}_3$ )  $\delta$  201.0, 138.0, 137.1, 134.4, 125.8, 83.1, 33.8, 24.8, 21.2.

$^{11}\text{B NMR}$  (128 MHz,  $\text{CDCl}_3$ )  $\delta$  34.30.

**HRMS** (ESI-TOF)  $m/z$ :  $[\text{M}+\text{H}]^+$  Calcd for  $\text{C}_{17}\text{H}_{26}\text{BO}_3$  289.1978; Found: 289.1972.

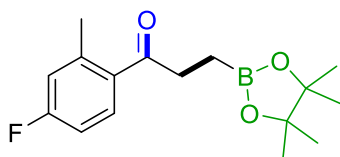

**1-(4-Fluoro-2-methylphenyl)-3-(4,4,5,5-tetramethyl-1,3,2-dioxaborolan-2-yl)propan-1-one (3o)**

35.1 mg, 60% yield, colorless oil. Eluent: pentane/ethyl acetate = 20/1.

$^1\text{H NMR}$  (700 MHz,  $\text{CDCl}_3$ )  $\delta$  7.31 (d,  $J = 9.0$  Hz, 1H), 7.19 – 7.14 (m, 1H), 7.03 (t,  $J = 8.0$  Hz, 1H), 3.00 (t,  $J = 7.0$  Hz, 2H), 2.41 (s, 3H), 1.24 (s, 12H), 1.09 – 1.01 (m, 2H).

$^{13}\text{C NMR}$  (176 MHz,  $\text{CDCl}_3$ )  $\delta$  203.8 (d,  $J = 2.5$  Hz), 161.3, 159.9, 139.5 (d,  $J = 5.8$  Hz), 133.1 (d,  $J = 7.6$  Hz), 117.6 (d,  $J = 20.8$  Hz), 114.9 (d,  $J = 22.3$  Hz), 83.2, 36.7, 24.8, 20.2.

$^{19}\text{F NMR}$  (376 MHz,  $\text{CDCl}_3$ )  $\delta$  -117.15.

$^{11}\text{B NMR}$  (128 MHz,  $\text{CDCl}_3$ )  $\delta$  34.15.

**HRMS** (ESI-TOF)  $m/z$ :  $[\text{M}+\text{H}]^+$  Calcd for  $\text{C}_{16}\text{H}_{23}\text{BO}_3\text{F}$  293.1727; Found: 293.1725.

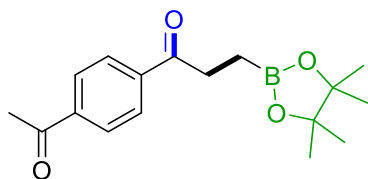

**1-(4-Acetylphenyl)-3-(4,4,5,5-tetramethyl-1,3,2-dioxaborolan-2-yl)propan-1-one (3p)**

36.2 mg, 60% yield, slight yellow solid. Eluent: pentane/ethyl acetate = 6/1.

$^1\text{H NMR}$  (700 MHz,  $\text{CDCl}_3$ )  $\delta$  8.02 (q,  $J = 8.5$  Hz, 4H), 3.16 (t,  $J = 7.0$  Hz, 2H), 2.63 (s, 3H), 1.24 (s, 12H), 1.09 (t,  $J = 7.0$  Hz, 2H).

$^{13}\text{C NMR}$  (176 MHz,  $\text{CDCl}_3$ )  $\delta$  200.1, 197.6, 140.2, 139.9, 128.4, 128.2, 83.2, 34.1, 26.9, 24.8.

$^{11}\text{B NMR}$  (128 MHz,  $\text{CDCl}_3$ )  $\delta$  34.26.

**HRMS** (ESI-TOF)  $m/z$ :  $[\text{M}+\text{H}]^+$  Calcd for  $\text{C}_{17}\text{H}_{24}\text{BO}_4$  303.1771; Found: 303.1773.

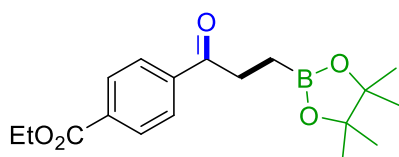

**Ethyl 4-(3-(4,4,5,5-tetramethyl-1,3,2-dioxaborolan-2-yl)propanoyl)benzoate (3q)**

39.9 mg, 60% yield, slight yellow sticky oil. Eluent: pentane/ethyl acetate = 6/1.

$^1\text{H NMR}$  (700 MHz,  $\text{CDCl}_3$ )  $\delta$  8.10 (d,  $J = 8.5$  Hz, 2H), 8.00 (d,  $J = 8.5$  Hz, 2H), 4.40 (q,  $J = 7.0$  Hz, 2H), 3.16 (t,  $J = 7.0$  Hz, 2H), 1.40 (t,  $J = 7.0$  Hz, 3H), 1.24 (s, 12H), 1.09 (t,  $J = 7.0$  Hz, 2H).

$^{13}\text{C NMR}$  (176 MHz,  $\text{CDCl}_3$ )  $\delta$  200.2, 165.9, 140.1, 134.0, 129.7, 127.9, 83.2, 61.4, 34.1, 24.8, 14.3.

$^{11}\text{B NMR}$  (128 MHz,  $\text{CDCl}_3$ )  $\delta$  34.06.

**HRMS** (ESI-TOF)  $m/z$ :  $[\text{M}+\text{H}]^+$  Calcd for  $\text{C}_{18}\text{H}_{26}\text{BO}_5$  333.1891; Found: 333.1897.

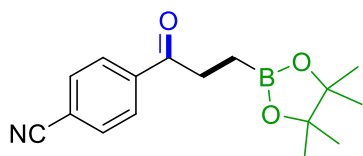

**4-(3-(4,4,5,5-Tetramethyl-1,3,2-dioxaborolan-2-yl)propanoyl)benzonitrile (3r)**

35.4 mg, 62% yield, light yellow oil. Eluent: pentane/ethyl acetate = 8/1.

$^1\text{H NMR}$  (700 MHz,  $\text{CDCl}_3$ )  $\delta$  8.05 (d,  $J = 7.5$  Hz, 2H), 7.76 (d,  $J = 7.5$  Hz, 1H), 3.15 (t,  $J = 7.0$  Hz, 2H), 1.25 (s, 12H), 1.10 (t,  $J = 6.5$  Hz, 2H).

$^{13}\text{C NMR}$  (176 MHz,  $\text{CDCl}_3$ )  $\delta$  199.3, 140.0, 132.4, 128.4, 118.1, 116.1, 83.3, 34.1, 25.0, 24.8.

$^{11}\text{B NMR}$  (128 MHz,  $\text{CDCl}_3$ )  $\delta$  33.88.

**HRMS** (ESI-TOF)  $m/z$ :  $[\text{M}+\text{H}]^+$  Calcd for  $\text{C}_{16}\text{H}_{21}\text{BNO}_3$  286.1614; Found: 286.1617.

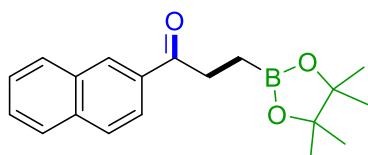

**1-(Naphthalen-2-yl)-3-(4,4,5,5-tetramethyl-1,3,2-dioxaborolan-2-yl)propan-1-one (3s)**

40.9 mg, 66% yield, slight yellow oil. Eluent: pentane/ethyl acetate = 10/1.

$^1\text{H NMR}$  (700 MHz,  $\text{CDCl}_3$ )  $\delta$  8.49 (s, 1H), 8.04 (dd,  $J = 8.5, 1.5$  Hz, 1H), 7.95 (d,  $J = 8.0$  Hz, 1H), 7.87 (t,  $J = 8.5$  Hz, 2H), 7.62 – 7.51 (m, 2H), 3.29 (t,  $J = 7.0$  Hz, 2H), 1.27 (s, 12H), 1.14 (t,  $J = 7.0$  Hz, 2H).

$^{13}\text{C NMR}$  (176 MHz,  $\text{CDCl}_3$ )  $\delta$  200.6, 135.5, 134.3, 132.6, 129.5, 129.5, 128.3, 128.2, 127.8, 126.7, 124.0, 83.2, 33.7, 25.0, 24.8.

$^{11}\text{B NMR}$  (128 MHz,  $\text{CDCl}_3$ )  $\delta$  34.89.

**HRMS** (ESI-TOF)  $m/z$ :  $[\text{M}+\text{H}]^+$  Calcd for  $\text{C}_{19}\text{H}_{24}\text{BO}_3$  311.1822; Found: 311.1826.

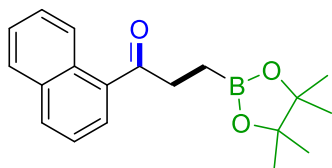

**1-(Naphthalen-1-yl)-3-(4,4,5,5-tetramethyl-1,3,2-dioxaborolan-2-yl)propan-1-one (3t)**

38.4 mg, 62% yield, slight yellow oil. Eluent: pentane/ethyl acetate = 10/1.

$^1\text{H NMR}$  (700 MHz,  $\text{CDCl}_3$ )  $\delta$  8.56 (d,  $J = 8.5$  Hz, 1H), 7.95 (d,  $J = 8.0$  Hz, 1H), 7.85 (dd,  $J = 7.5, 3.5$  Hz, 2H), 7.61 – 7.43 (m, 3H), 3.22 (t,  $J = 7.0$  Hz, 2H), 1.28 (s, 12H), 1.15 (t,  $J = 7.0$  Hz, 2H).

$^{13}\text{C NMR}$  (176 MHz,  $\text{CDCl}_3$ )  $\delta$  205.3, 136.5, 133.9, 132.0, 130.1, 128.3, 127.6, 126.9, 126.3, 125.9, 124.4, 83.2, 37.4, 24.9.

$^{11}\text{B NMR}$  (128 MHz,  $\text{CDCl}_3$ )  $\delta$  34.23.

**HRMS** (ESI-TOF)  $m/z$ :  $[\text{M}+\text{H}]^+$  Calcd for  $\text{C}_{19}\text{H}_{24}\text{BO}_3$  311.1822; Found: 311.1824.

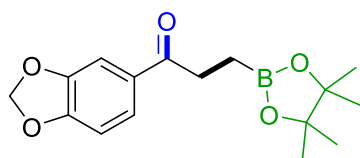

**1-(Benzo[d][1,3]dioxol-5-yl)-3-(4,4,5,5-tetramethyl-1,3,2-dioxaborolan-2-yl)propan-1-one (3u)**

35.3 mg, 58% yield, light yellow oil. Eluent: pentane/ethyl acetate = 8/1.

$^1\text{H NMR}$  (700 MHz,  $\text{CDCl}_3$ )  $\delta$  7.57 (d,  $J = 8.0$  Hz, 1H), 7.44 (s, 1H), 6.83 (d,  $J = 8.0$  Hz, 1H), 6.02 (s, 2H), 3.07 (t,  $J = 7.0$  Hz, 2H), 1.25 (s, 12H), 1.05 (t,  $J = 7.0$  Hz, 2H).

$^{13}\text{C NMR}$  (176 MHz,  $\text{CDCl}_3$ )  $\delta$  198.6, 151.4, 148.0, 131.8, 124.1, 107.9, 107.8, 101.7, 83.1, 33.4, 25.0, 24.8.

$^{11}\text{B NMR}$  (128 MHz,  $\text{CDCl}_3$ )  $\delta$  34.17.

**HRMS** (ESI-TOF)  $m/z$ :  $[\text{M}+\text{H}]^+$  Calcd for  $\text{C}_{16}\text{H}_{22}\text{BO}_5$  305.1563; Found: 305.1568.

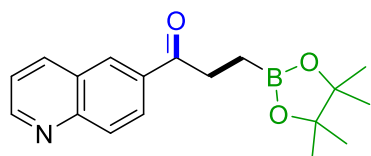

**1-(Quinolin-6-yl)-3-(4,4,5,5-tetramethyl-1,3,2-dioxaborolan-2-yl)propan-1-one**

**(3v)**

43.5 mg, 70% yield, brown solid. Eluent: pentane/ethyl acetate = 2/1.

**<sup>1</sup>H NMR** (700 MHz, CDCl<sub>3</sub>) δ 9.09 – 8.93 (m, 1H), 8.47 (s, 1H), 8.28 (d, *J* = 8.5 Hz, 2H), 8.15 (d, *J* = 9.0 Hz, 1H), 7.47 (dd, *J* = 8.0, 4.0 Hz, 1H), 3.30 (t, *J* = 7.0 Hz, 2H), 1.27 (s, 12H), 1.16 (t, *J* = 7.0 Hz, 2H).

**<sup>13</sup>C NMR** (176 MHz, CDCl<sub>3</sub>) δ 199.9, 152.4, 150.0, 137.5, 134.7, 129.7, 129.2, 127.8, 127.5, 121.8, 83.2, 33.9, 24.8.

**<sup>11</sup>B NMR** (128 MHz, CDCl<sub>3</sub>) δ 34.28.

**HRMS** (ESI-TOF) *m/z*: [M+H]<sup>+</sup> Calcd for C<sub>18</sub>H<sub>23</sub>BO<sub>3</sub>N 312.1774; Found: 312.1777.

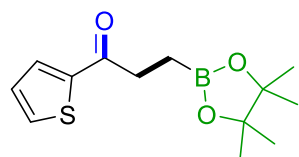

**3-(4,4,5,5-Tetramethyl-1,3,2-dioxaborolan-2-yl)-1-(thiophen-2-yl)propan-1-one**

**(3w)**

39.4 mg, 74% yield, yellow oil. Eluent: pentane/ethyl acetate = 10/1.

**<sup>1</sup>H NMR** (700 MHz, CDCl<sub>3</sub>) δ 7.73 (d, *J* = 3.5 Hz, 1H), 7.59 (d, *J* = 5.0 Hz, 1H), 7.16 – 7.06 (m, 1H), 3.09 (t, *J* = 7.0 Hz, 2H), 1.25 (s, 12H), 1.09 (t, *J* = 7.0 Hz, 2H).

**<sup>13</sup>C NMR** (176 MHz, CDCl<sub>3</sub>) δ 193.6, 144.1, 132.9, 131.5, 127.9, 83.2, 34.2, 25.0, 24.8.

**<sup>11</sup>B NMR** (128 MHz, CDCl<sub>3</sub>) δ 34.24.

**HRMS** (ESI-TOF) *m/z*: [M+H]<sup>+</sup> Calcd for C<sub>13</sub>H<sub>20</sub>BO<sub>3</sub>S 267.1229; Found: 267.1224.



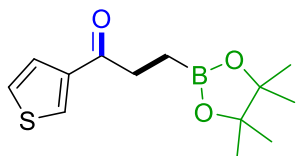

**3-(4,4,5,5-Tetramethyl-1,3,2-dioxaborolan-2-yl)-1-(thiophen-3-yl)propan-1-one**

**(3x)**

40.5 mg, 76% yield, yellow oil. Eluent: pentane/ethyl acetate = 10/1.

$^1\text{H NMR}$  (700 MHz,  $\text{CDCl}_3$ )  $\delta$  8.05 (d,  $J = 2.5$  Hz, 1H), 7.55 (d,  $J = 5.0$  Hz, 1H), 7.29 (dd,  $J = 5.0, 3.0$  Hz, 1H), 3.06 (t,  $J = 7.0$  Hz, 2H), 1.25 (s, 12H), 1.06 (t,  $J = 7.0$  Hz, 2H).

$^{13}\text{C NMR}$  (176 MHz,  $\text{CDCl}_3$ )  $\delta$  195.0, 142.1, 131.5, 127.0, 126.0, 83.1, 34.8, 25.0, 24.8.

$^{11}\text{B NMR}$  (128 MHz,  $\text{CDCl}_3$ )  $\delta$  34.17.

**HRMS** (ESI-TOF)  $m/z$ :  $[\text{M}+\text{H}]^+$  Calcd for  $\text{C}_{13}\text{H}_{20}\text{BO}_3\text{S}$  267.1229; Found: 267.1227.

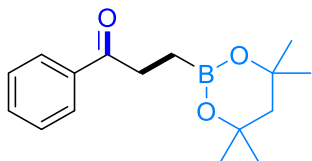

**1-Phenyl-3-(4,4,6,6-tetramethyl-1,3,2-dioxaborinan-2-yl)propan-1-one (3y)**

31.8 mg, 58% yield, colorless oil. Eluent: pentane/ethyl acetate = 20/1.

$^1\text{H NMR}$  (700 MHz,  $\text{CDCl}_3$ )  $\delta$  8.10 – 7.83 (m, 2H), 7.53 (t,  $J = 7.5$  Hz, 1H), 7.44 (t,  $J = 7.5$  Hz, 2H), 3.07 (t,  $J = 7.0$  Hz, 1H), 1.80 (s, 2H), 1.29 (s, 12H), 1.00 (t,  $J = 7.0$  Hz, 2H).

$^{13}\text{C NMR}$  (176 MHz,  $\text{CDCl}_3$ )  $\delta$  201.7, 137.5, 132.5, 128.4, 128.0, 70.3, 48.8, 33.8, 31.67.

$^{11}\text{B NMR}$  (128 MHz,  $\text{CDCl}_3$ )  $\delta$  30.26.

**HRMS** (ESI-TOF)  $m/z$ :  $[\text{M}+\text{H}]^+$  Calcd for  $\text{C}_{16}\text{H}_{24}\text{BO}_3$  275.1822; Found: 275.1828.

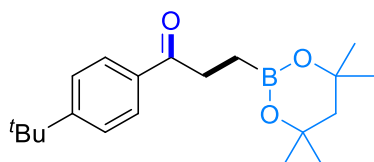

**1-(4-(Tert-butyl)phenyl)-3-(4,4,6,6-tetramethyl-1,3,2-dioxaborinan-2-yl)propan-1-one (3z)**

45.5 mg, 69% yield, yellow oil. Eluent: pentane/ethyl acetate = 20/1.

$^1\text{H NMR}$  (700 MHz,  $\text{CDCl}_3$ )  $\delta$  7.91 (d,  $J = 8.0$  Hz, 2H), 7.45 (d,  $J = 8.0$  Hz, 2H), 3.05 (t,  $J = 7.0$  Hz, 2H), 1.80 (s, 2H), 1.30 (s, 12H), 0.98 (t,  $J = 7.0$  Hz, 2H).

$^{13}\text{C NMR}$  (176 MHz,  $\text{CDCl}_3$ )  $\delta$  201.3, 156.0, 134.9, 127.9, 125.3, 70.3, 48.8, 35.0, 33.8, 31.7, 31.1.

$^{11}\text{B NMR}$  (128 MHz,  $\text{CDCl}_3$ )  $\delta$  30.12.

**HRMS** (ESI-TOF)  $m/z$ :  $[\text{M}+\text{H}]^+$  Calcd for  $\text{C}_{20}\text{H}_{32}\text{BO}_3$  331.2448; Found: 311.2453.

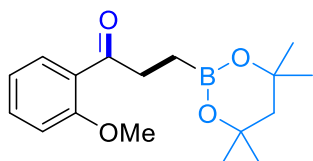

**1-(2-Methoxyphenyl)-3-(4,4,6,6-tetramethyl-1,3,2-dioxaborinan-2-yl)propan-1-one (3aa)**

41.4 mg, 68% yield, white solid. Eluent: pentane/ethyl acetate = 15/1.

$^1\text{H NMR}$  (700 MHz,  $\text{CDCl}_3$ )  $\delta$  7.63 (dd,  $J = 7.6, 1.7$  Hz, 1H), 7.47 – 7.34 (m, 1H), 7.02 – 6.87 (m, 2H), 3.88 (s, 3H), 3.06 (t,  $J = 7.0$  Hz, 2H), 1.80 (s, 2H), 1.33 (s, 12H), 0.93 (t,  $J = 6.9$  Hz, 2H).

$^{13}\text{C NMR}$  (176 MHz,  $\text{CDCl}_3$ )  $\delta$  204.3, 158.2, 132.6, 123.0, 120.4, 111.5, 70.2, 69.4, 55.5, 49.5, 39.1, 31.9, 31.7.

$^{11}\text{B NMR}$  (128 MHz,  $\text{CDCl}_3$ )  $\delta$  30.29.

**HRMS** (ESI-TOF)  $m/z$ :  $[\text{M}+\text{H}]^+$  Calcd for  $\text{C}_{17}\text{H}_{26}\text{BO}_4$  305.1927; Found: 305.1921.

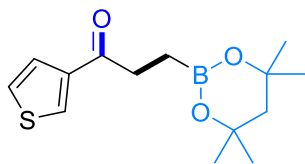

**3-(4,4,6,6-Tetramethyl-1,3,2-dioxaborinan-2-yl)-1-(thiophen-3-yl)propan-1-one  
(3ab)**

30.8 mg, 55% yield, pale yellow oil. Eluent: pentane/ethyl acetate = 20/1.

$^1\text{H NMR}$  (700 MHz,  $\text{CDCl}_3$ )  $\delta$  8.05 (s, 1H), 7.55 (d,  $J = 5.0$  Hz, 1H), 7.30 – 7.27 (m, 1H), 2.97 (t,  $J = 7.0$  Hz, 2H), 1.56 (s, 2H), 1.30 (s, 12H), 0.99 (t,  $J = 7.0$  Hz, 2H).

$^{13}\text{C NMR}$  (176 MHz,  $\text{CDCl}_3$ )  $\delta$  196.14, 142.61, 131.22, 127.08, 125.86, 69.38, 49.51, 31.93, 31.69.

**HRMS** (ESI-TOF)  $m/z$ :  $[\text{M}+\text{H}]^+$  Calcd for  $\text{C}_{14}\text{H}_{22}\text{BO}_3\text{S}$  281.1385; Found: 281.1380.

## 5. NMR Spectra

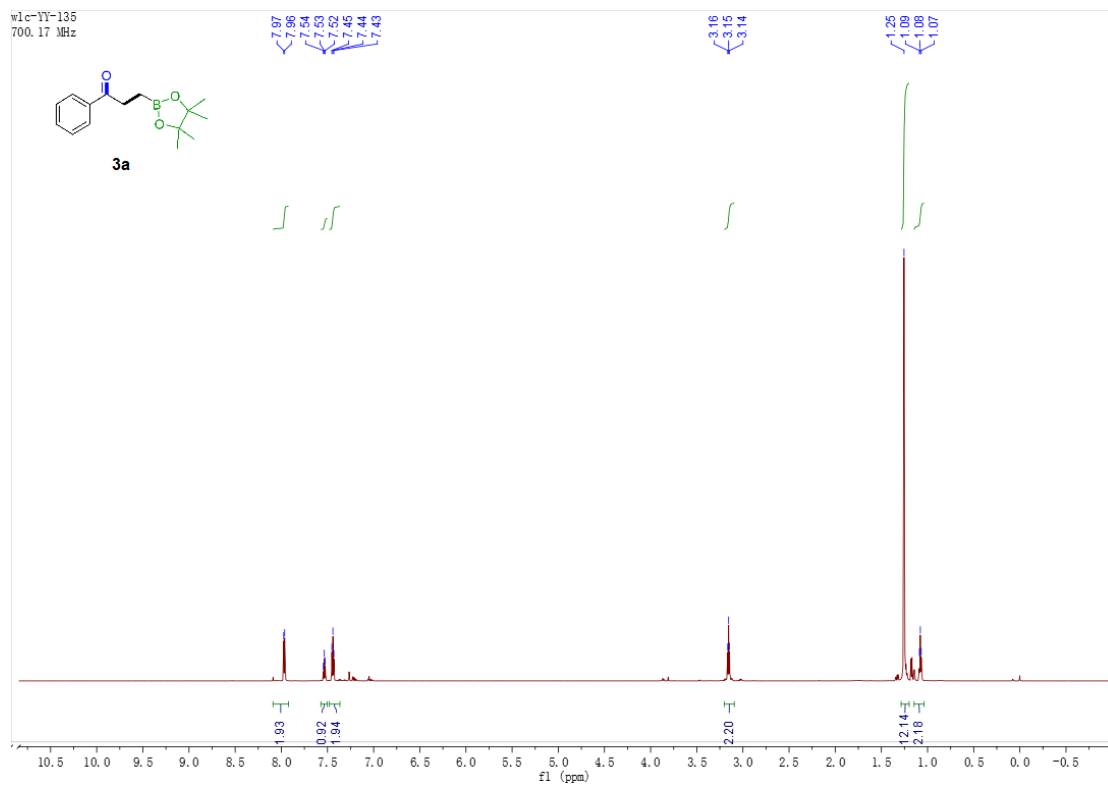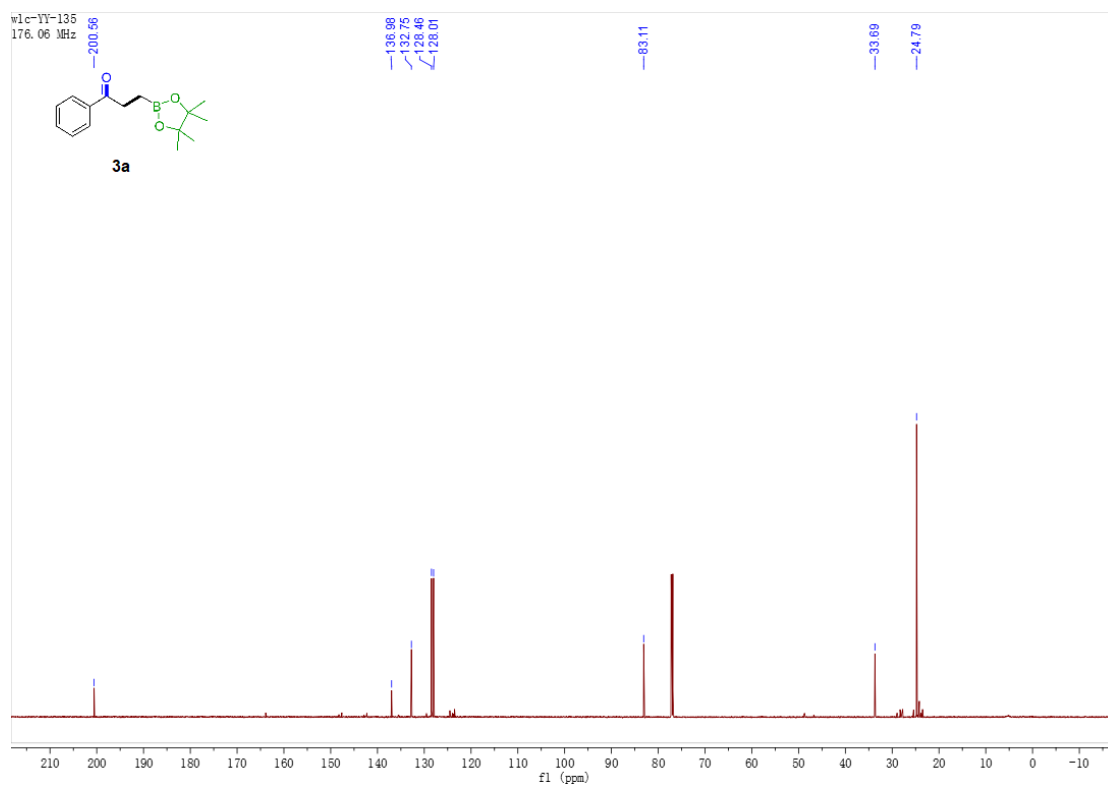

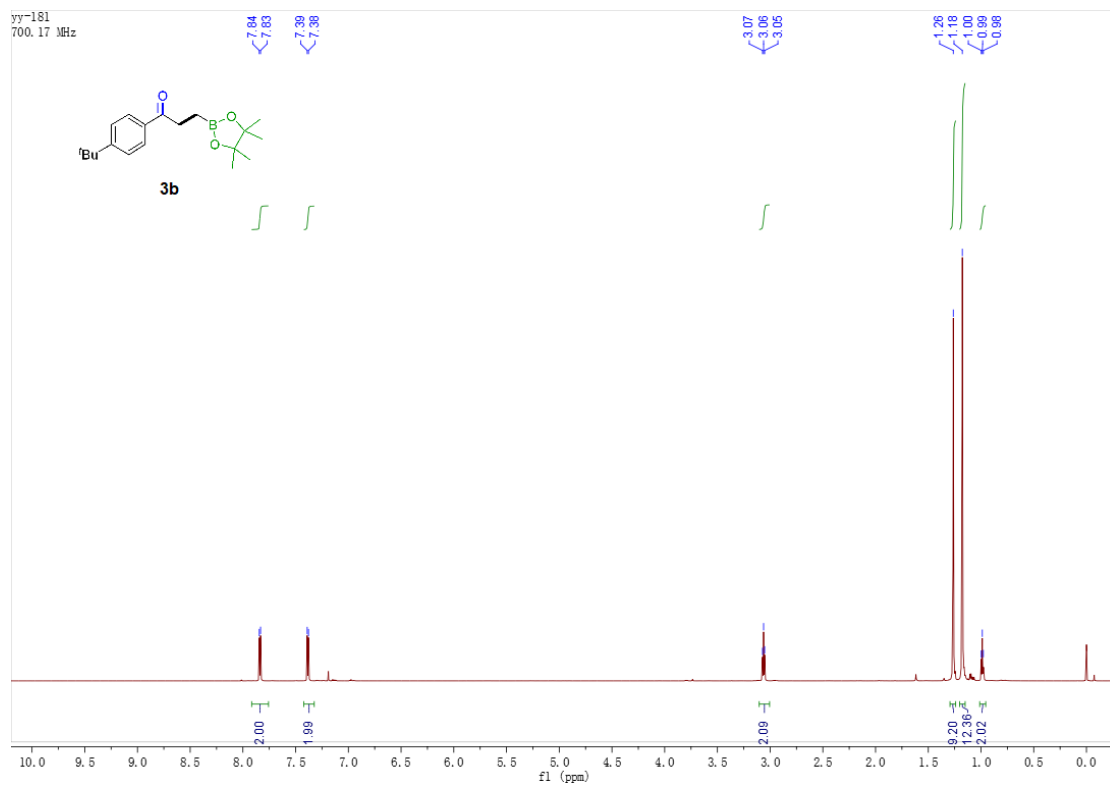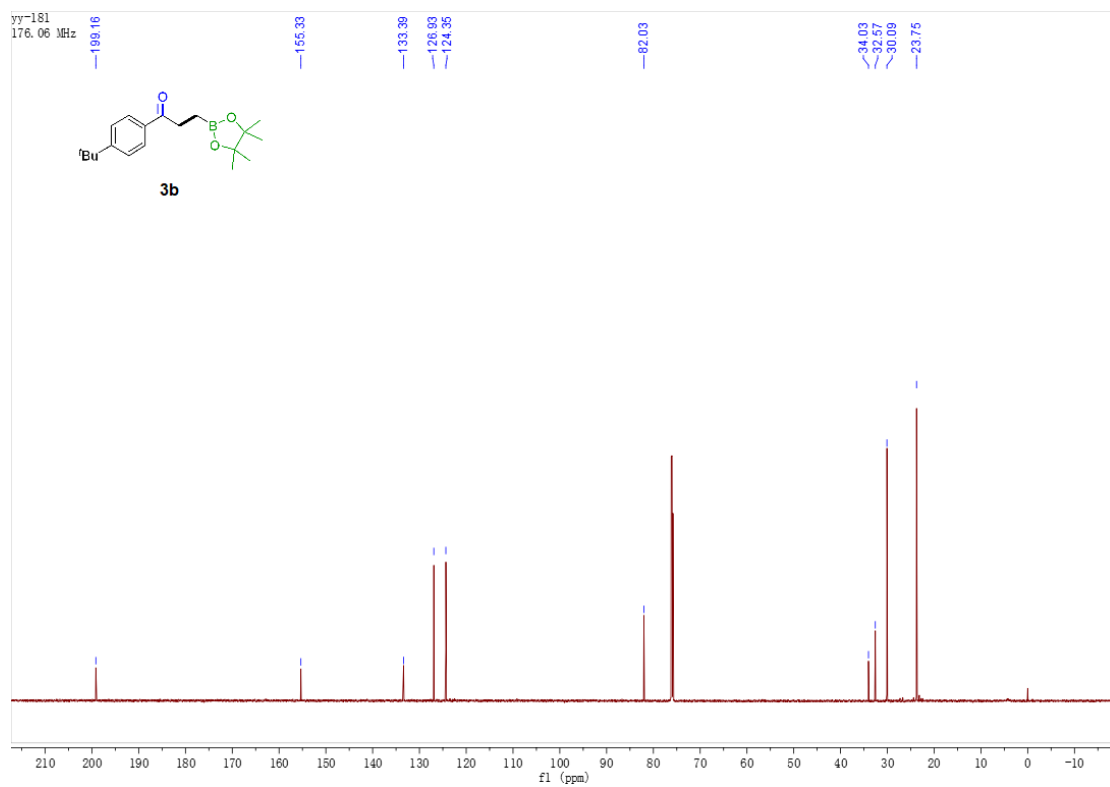

0690-YY-181  
B11ZG30 CDCl3 [D:\NMR400\DNL0604] nmrsu 1  
128.38 MHz

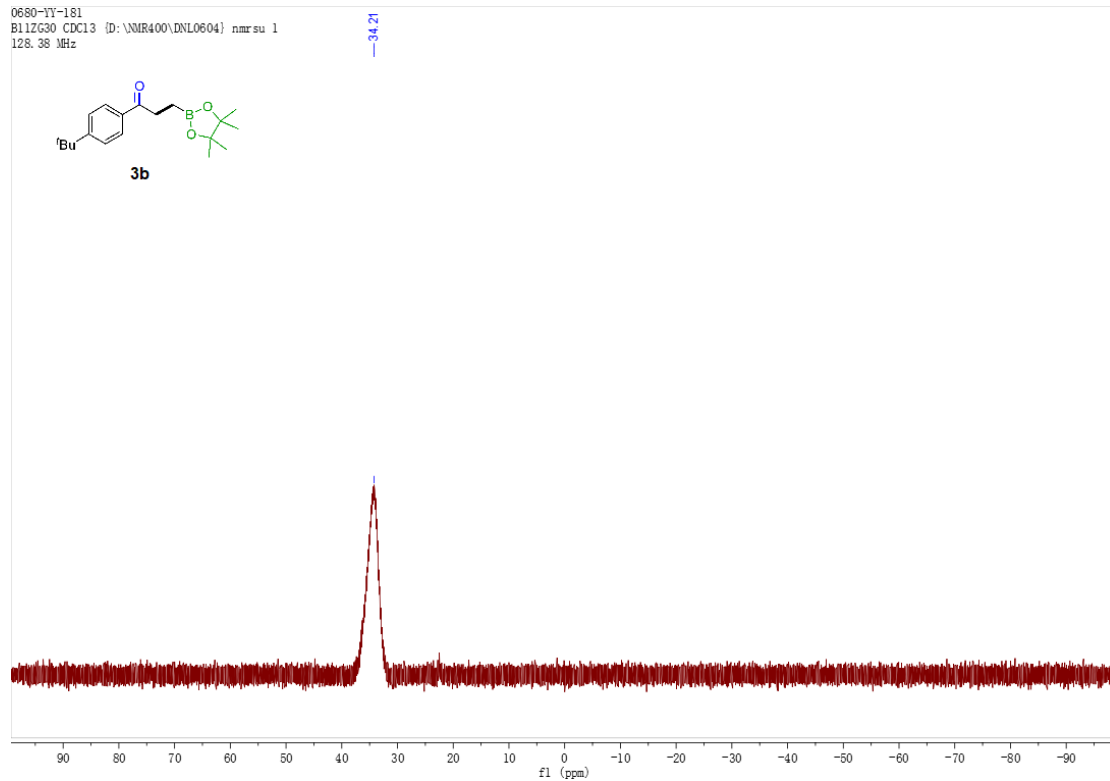

YY-182  
700.17 MHz

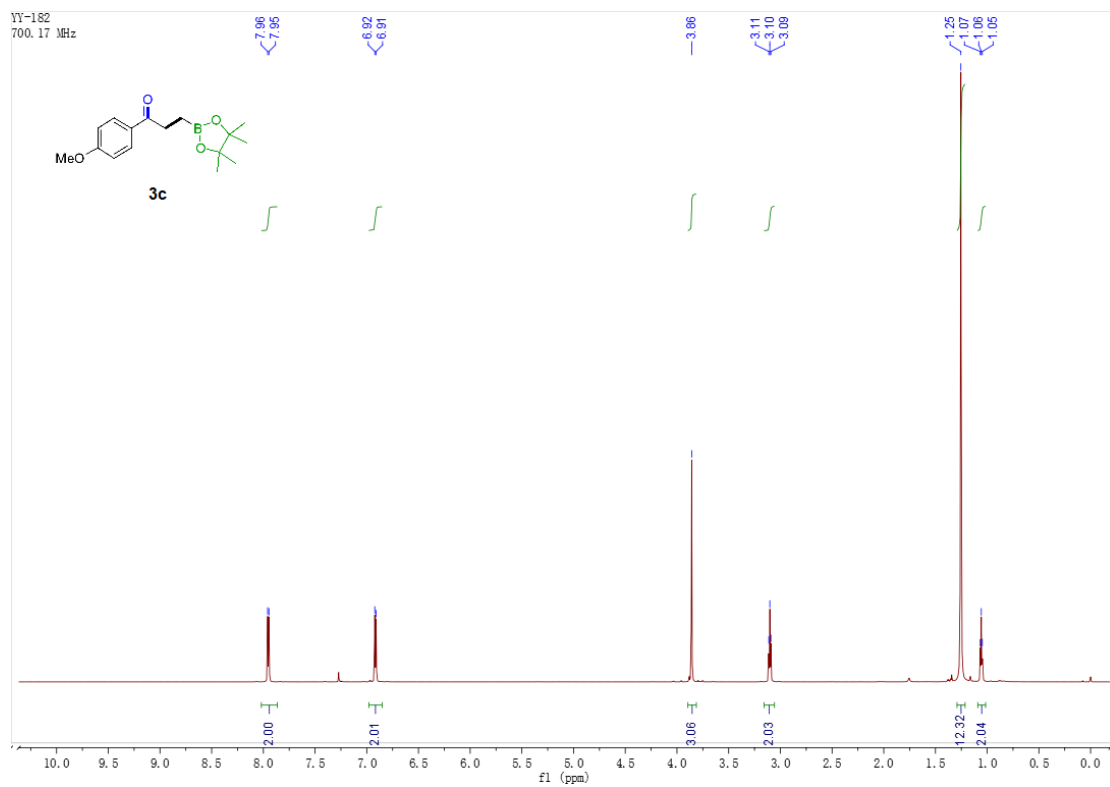

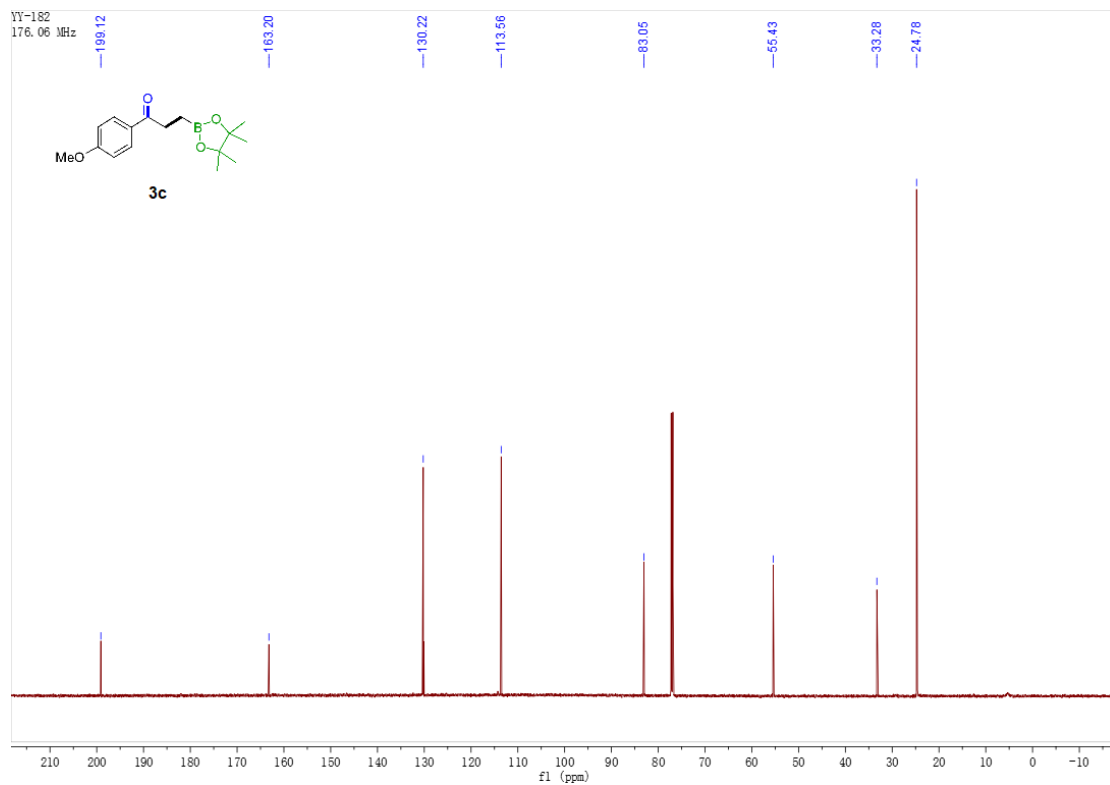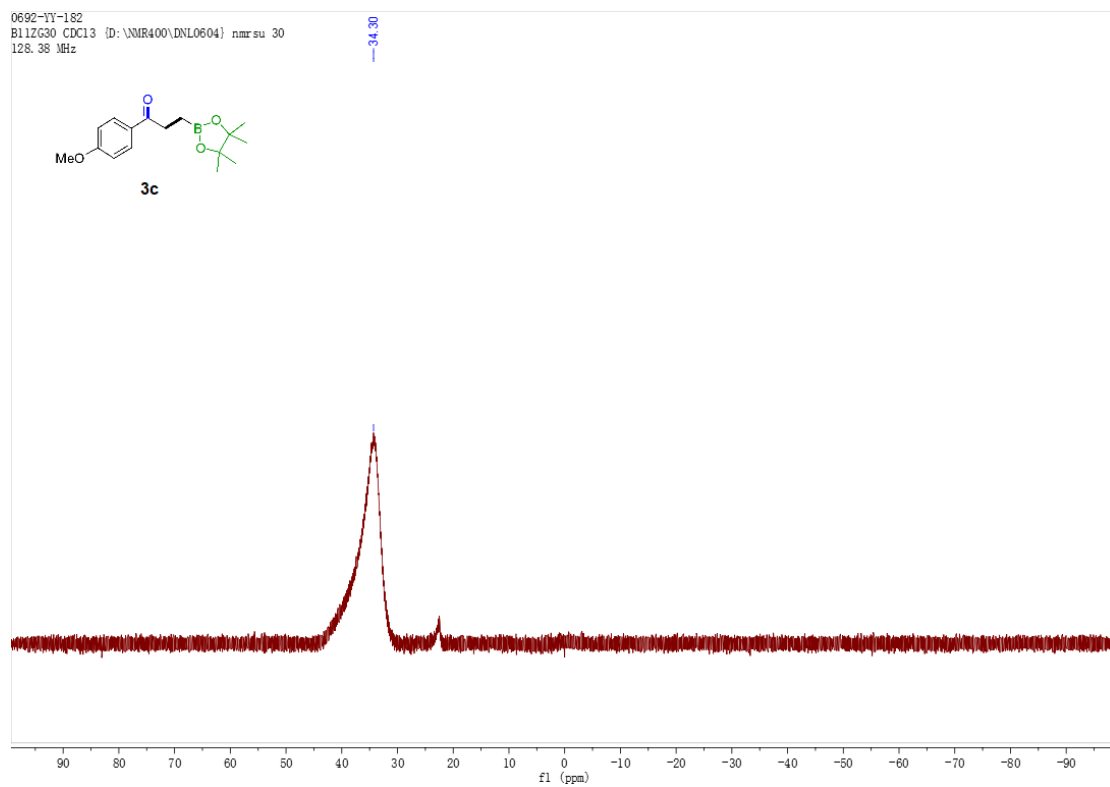

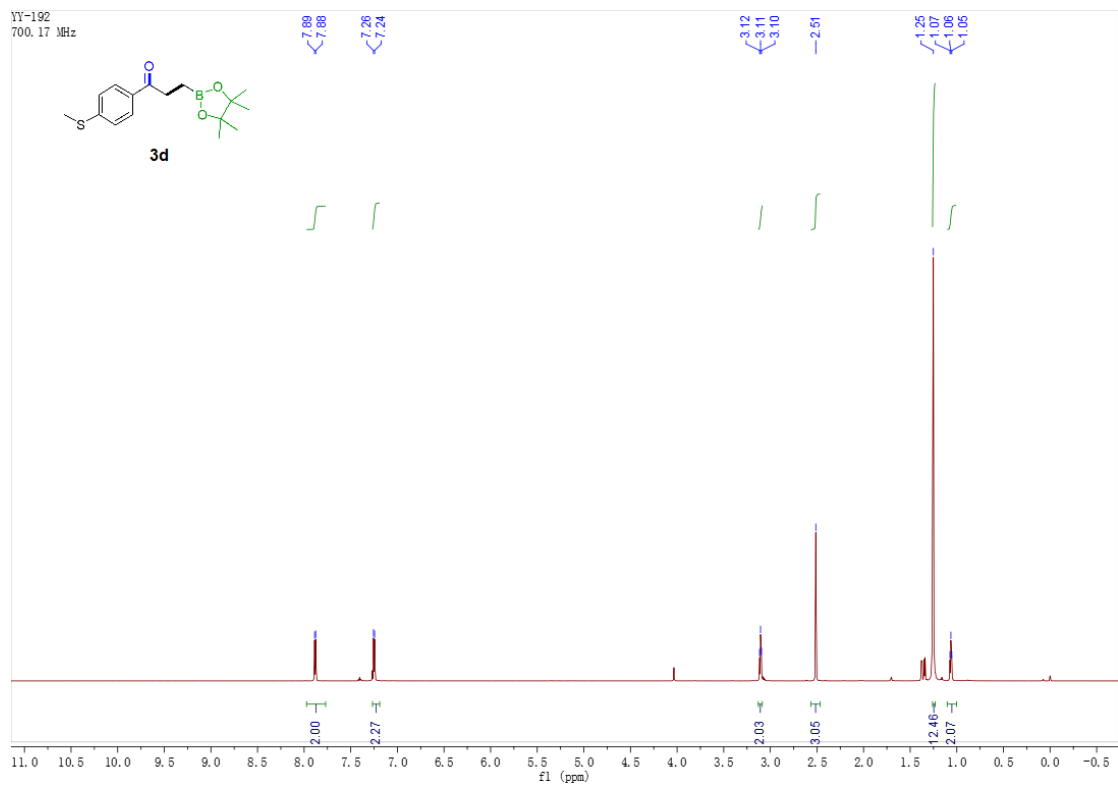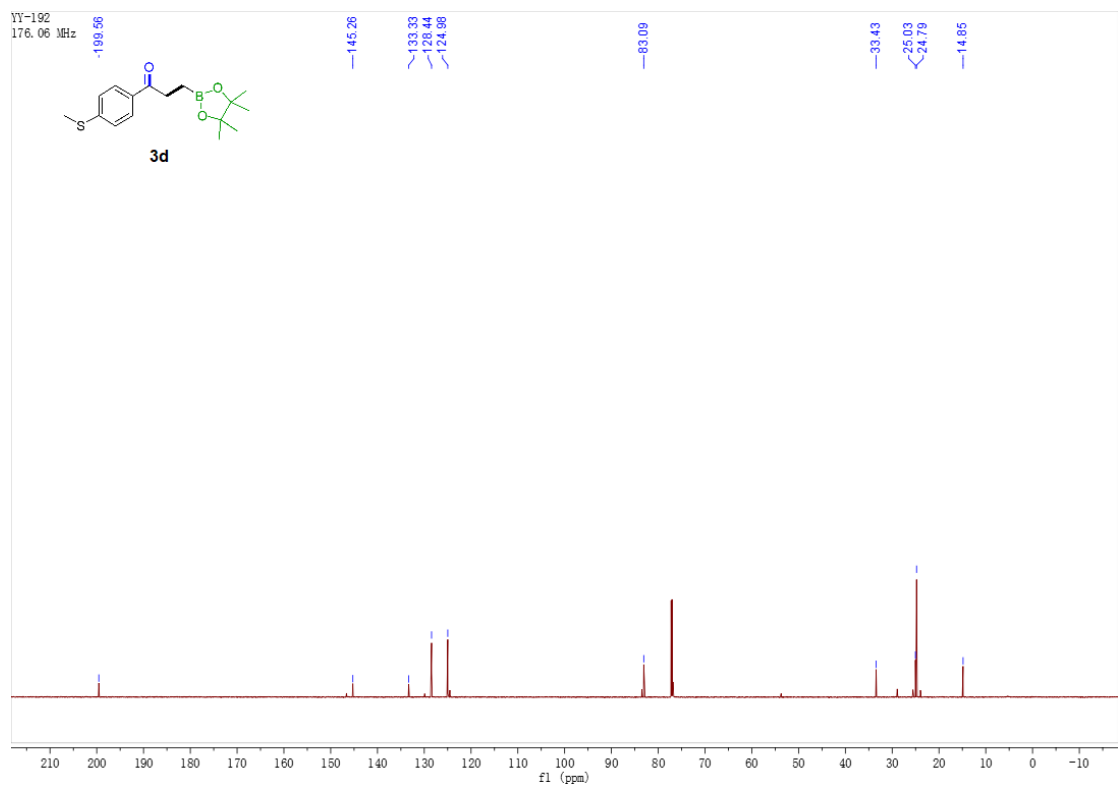



WT1650506422-1H-YY-207  
700.17 MHz

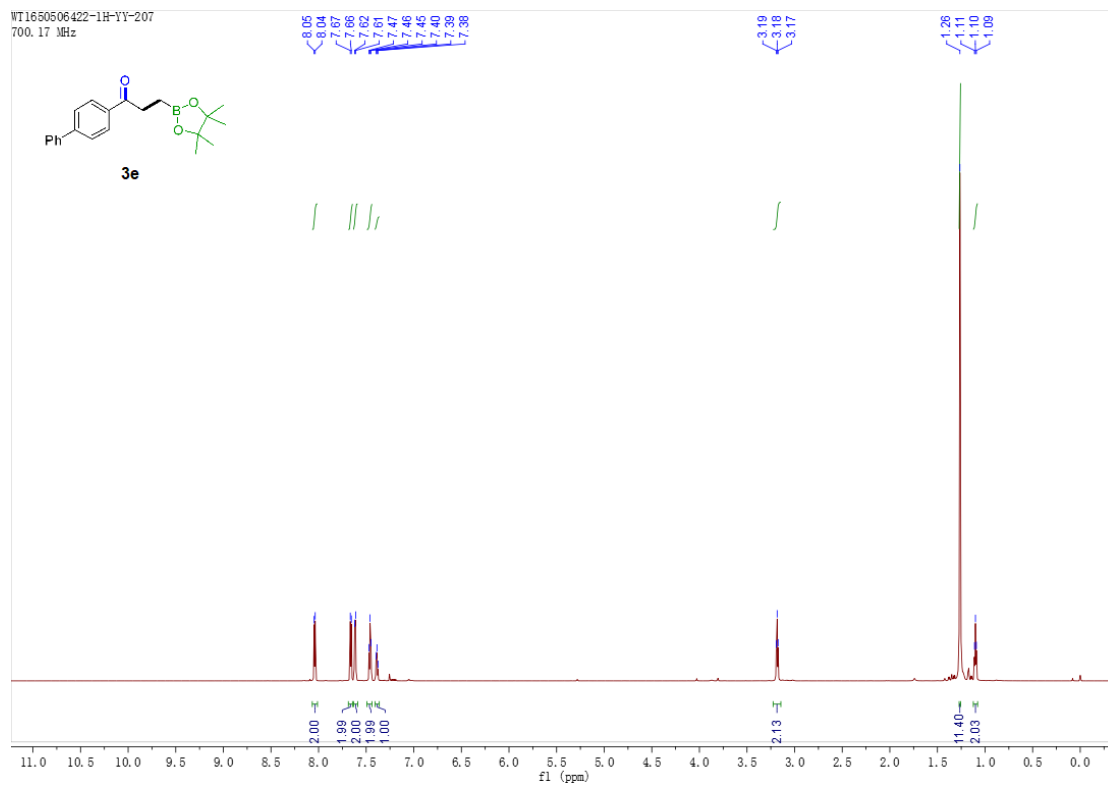

WT1650506422-13C-YY-207  
176.06 MHz

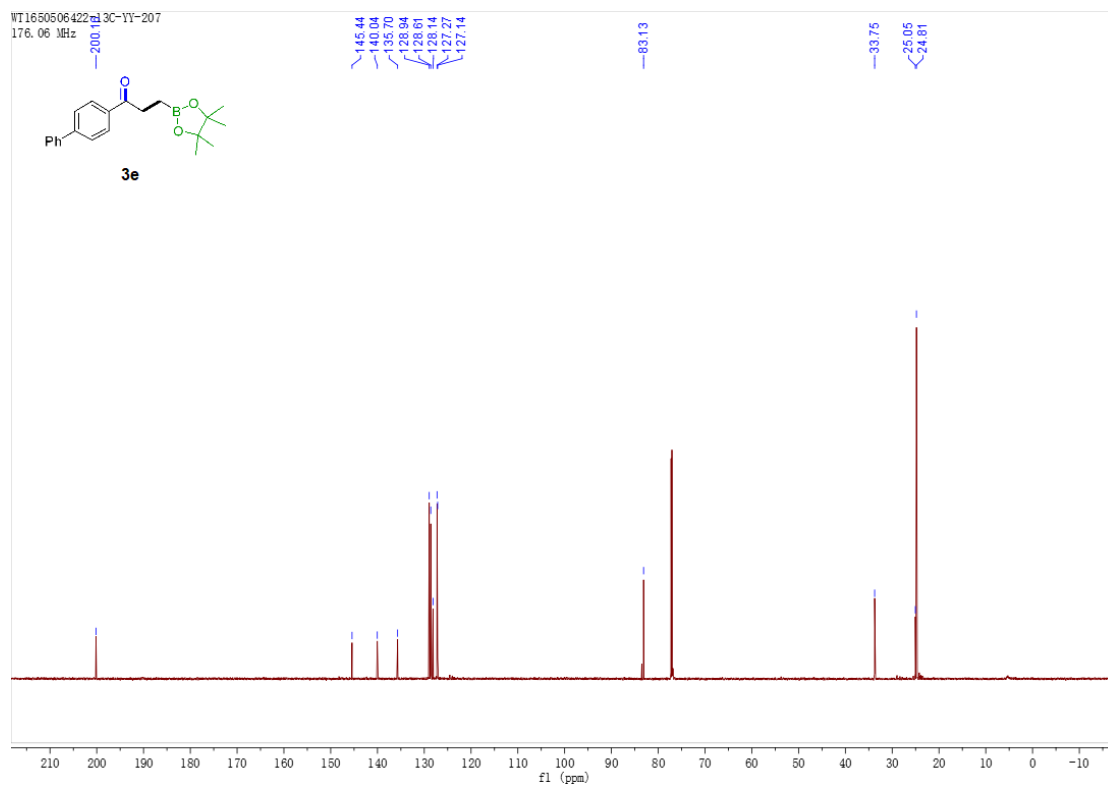

0692-YY-207  
B11ZG30 CDCl3 [D:\NMR400\DNL0604] nmr su 20  
128.38 MHz

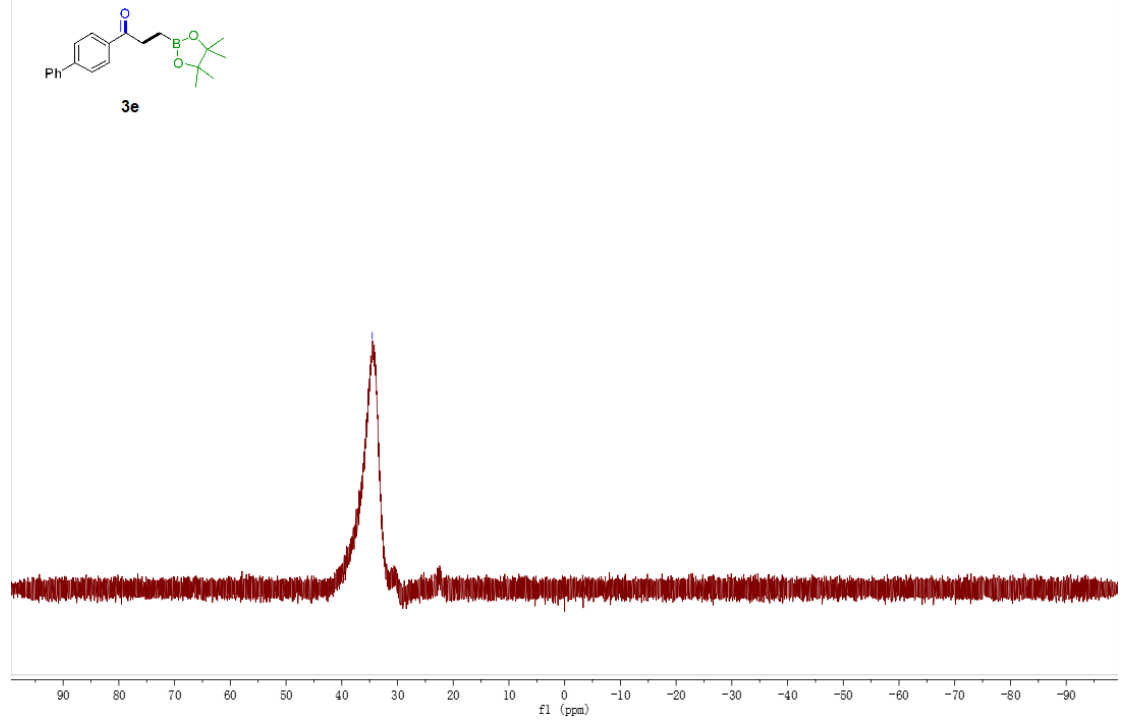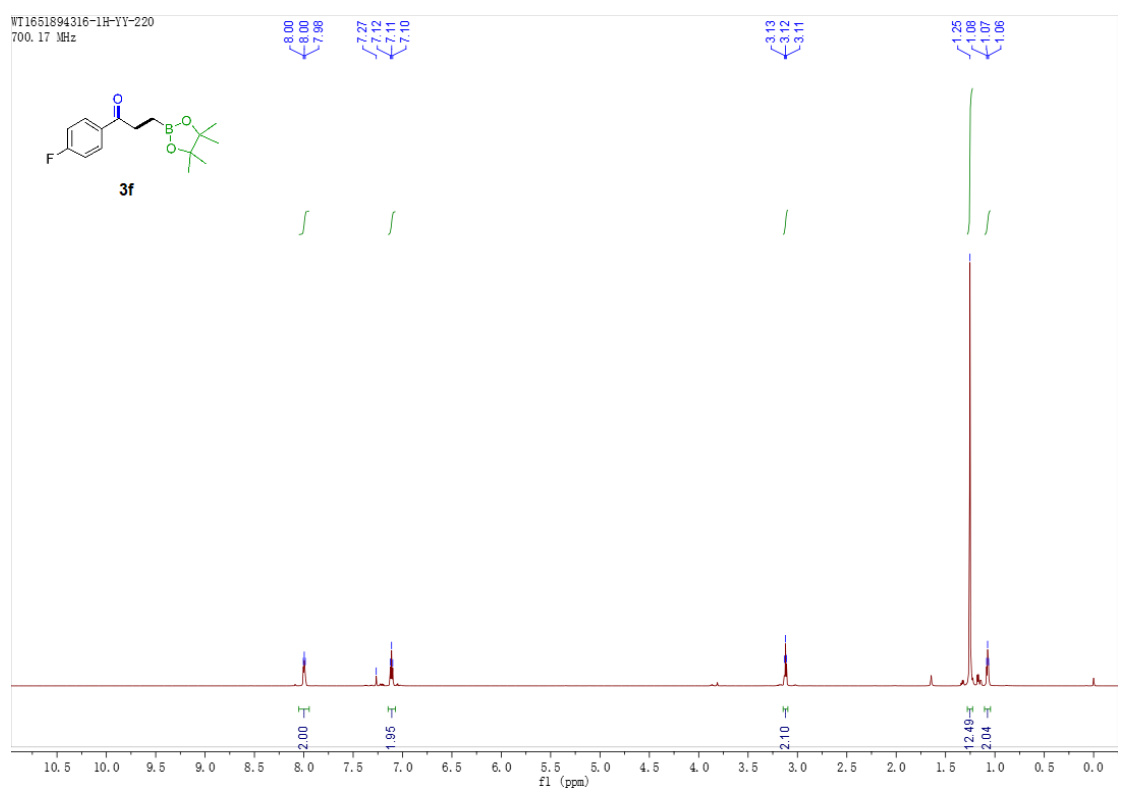

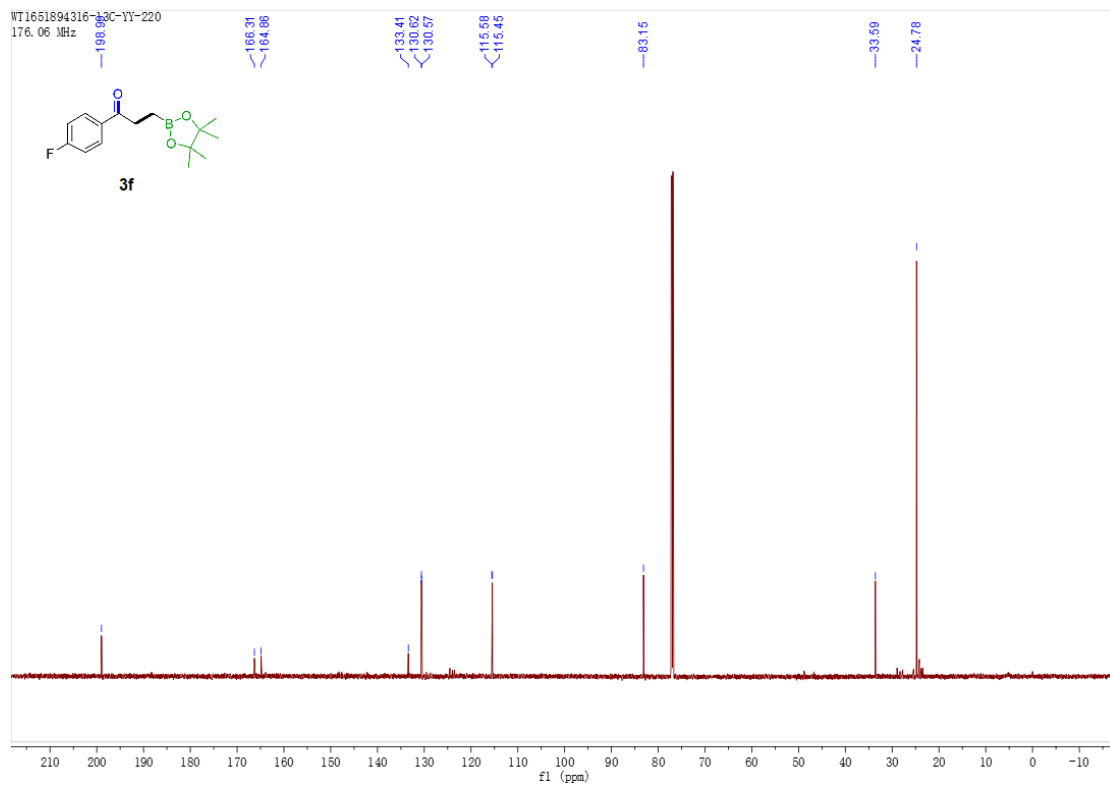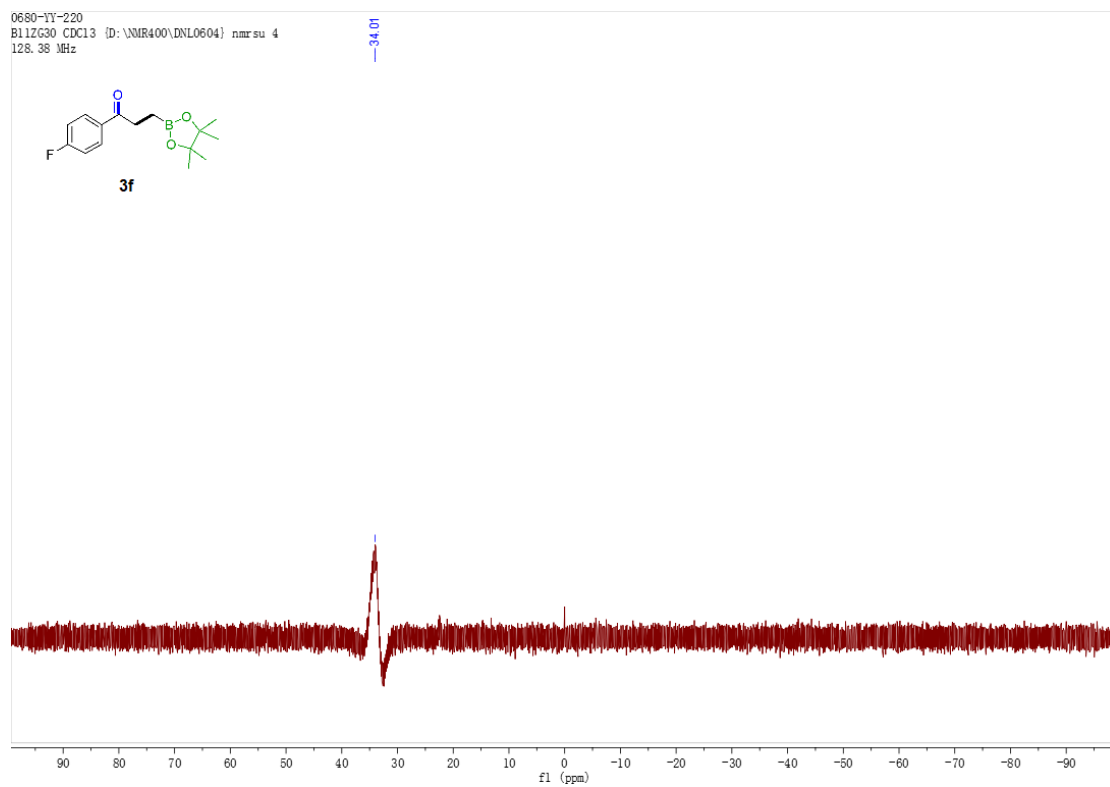

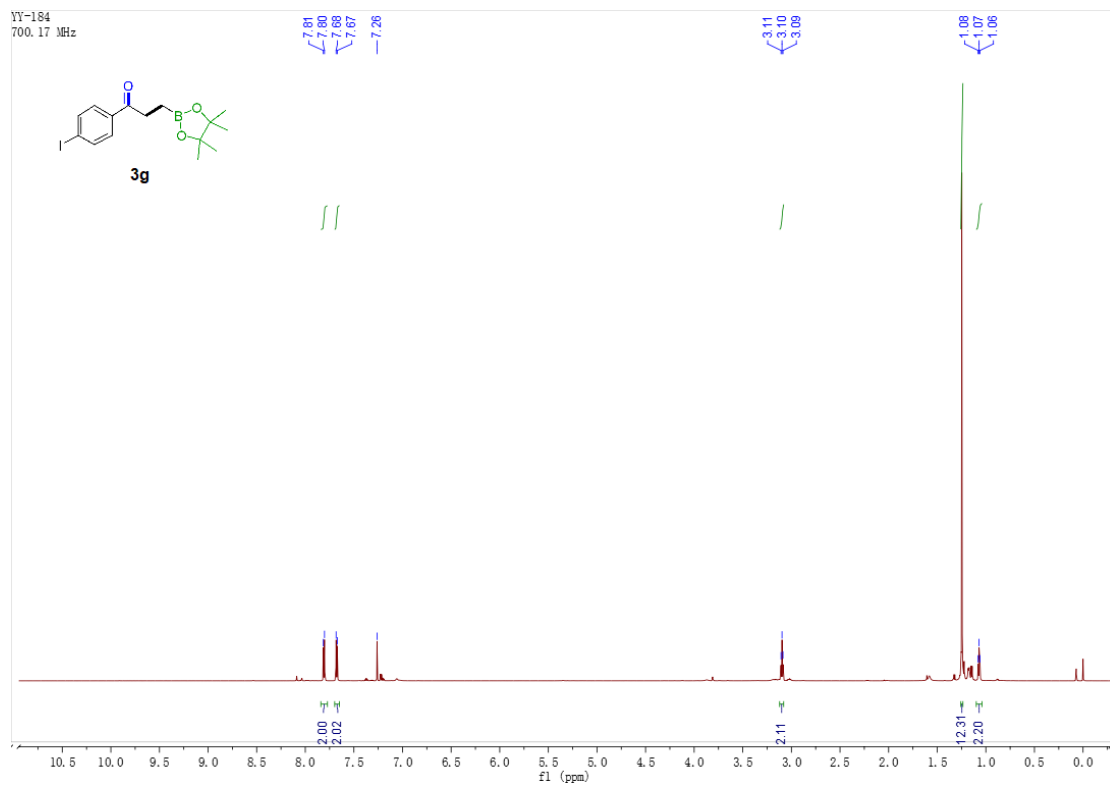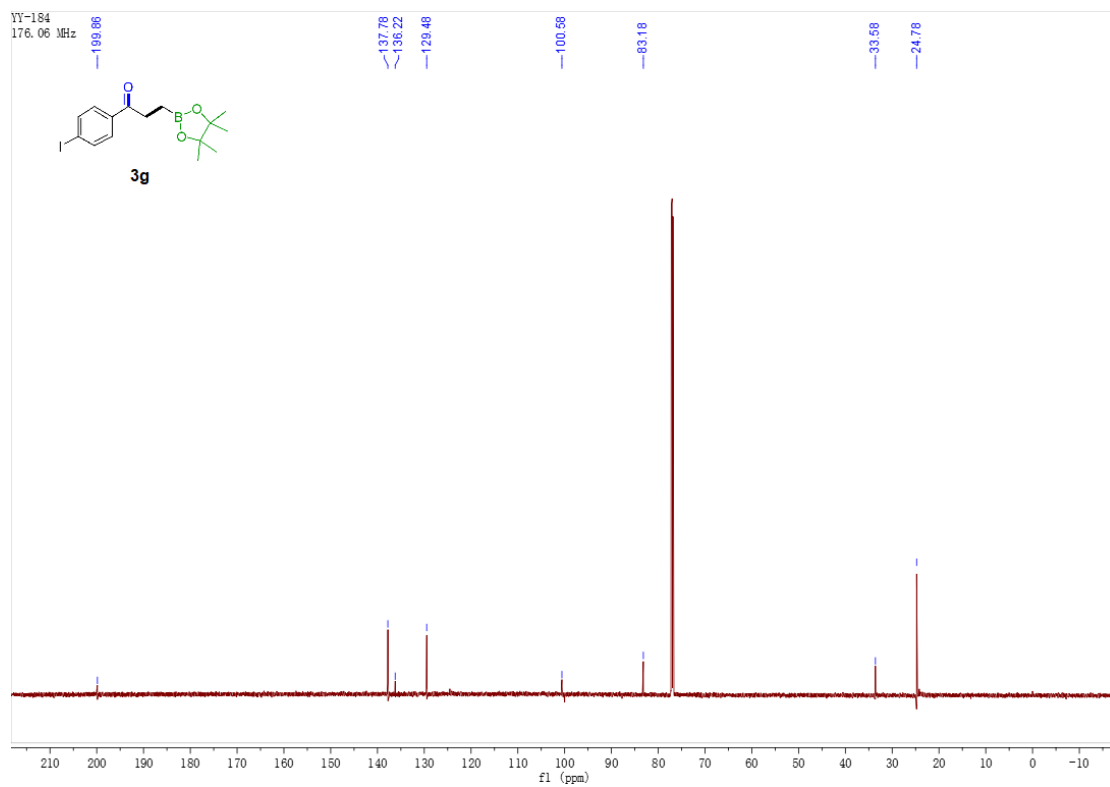

0692-YY-184  
B11ZG30 CDCl3 [D:\NMR400\DNL0604] nmrsu 7  
128.38 MHz

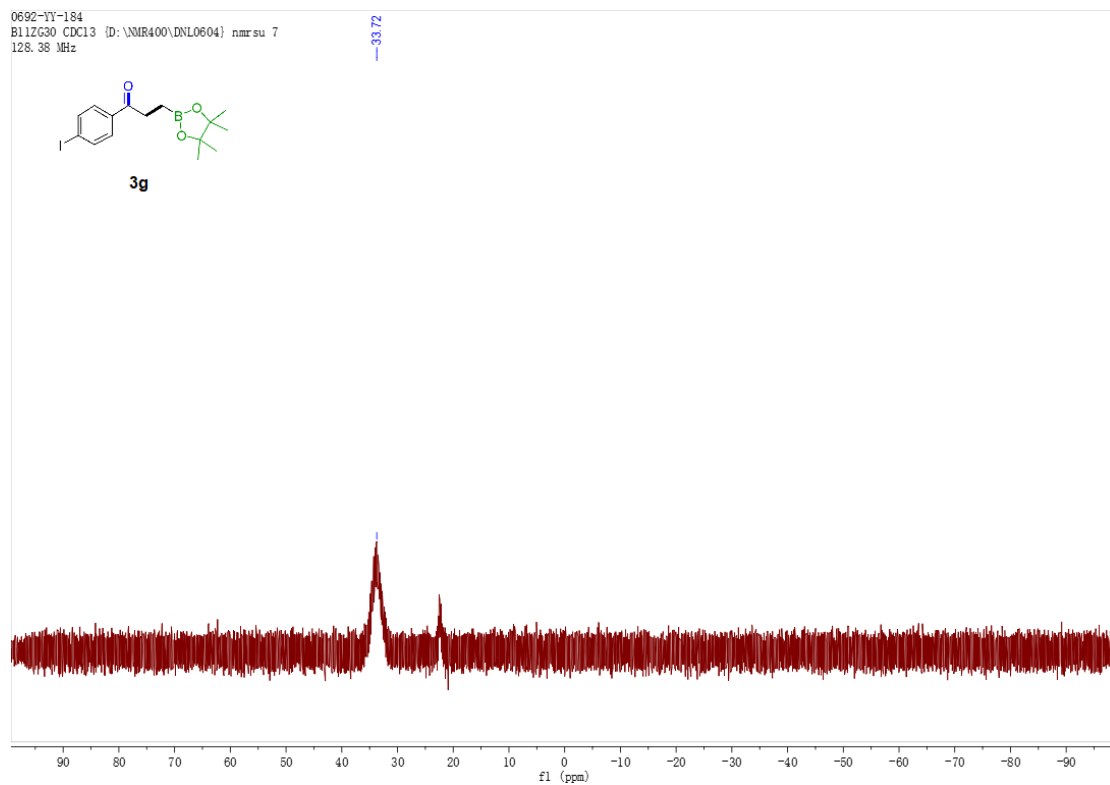

WT1650420011-1H-YY-194  
700.17 MHz

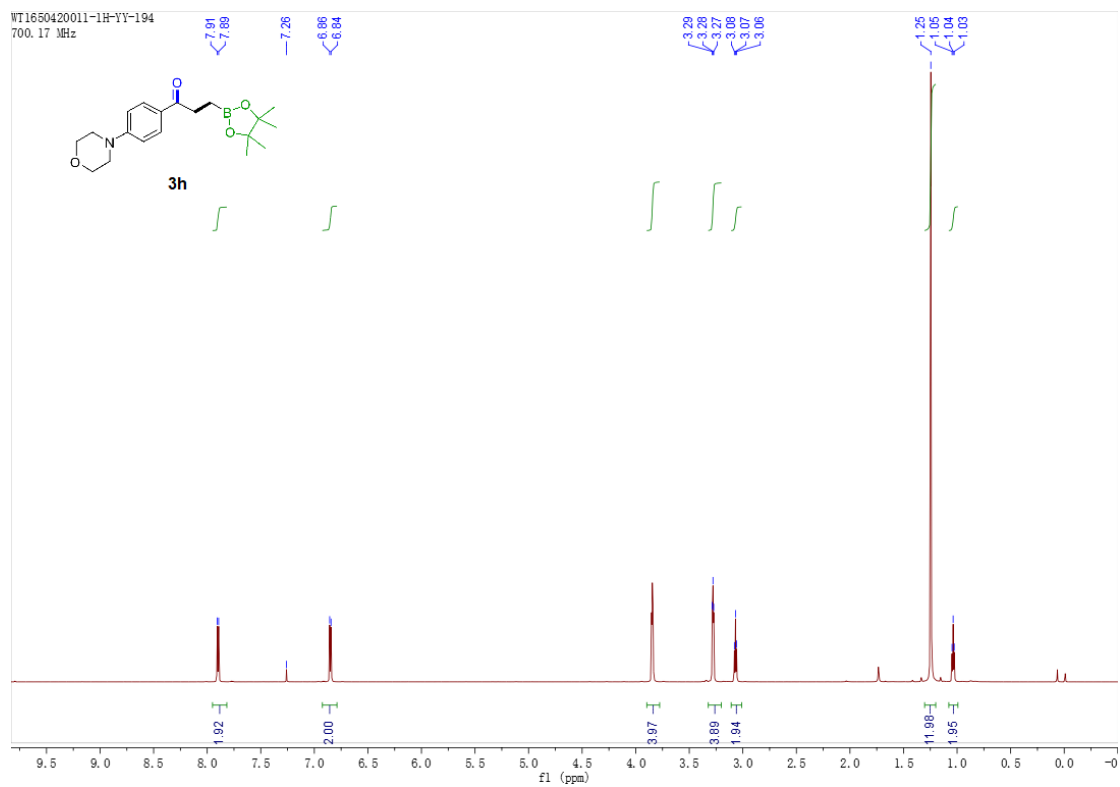

WT1650420011-13C-YY-194  
176.06 MHz

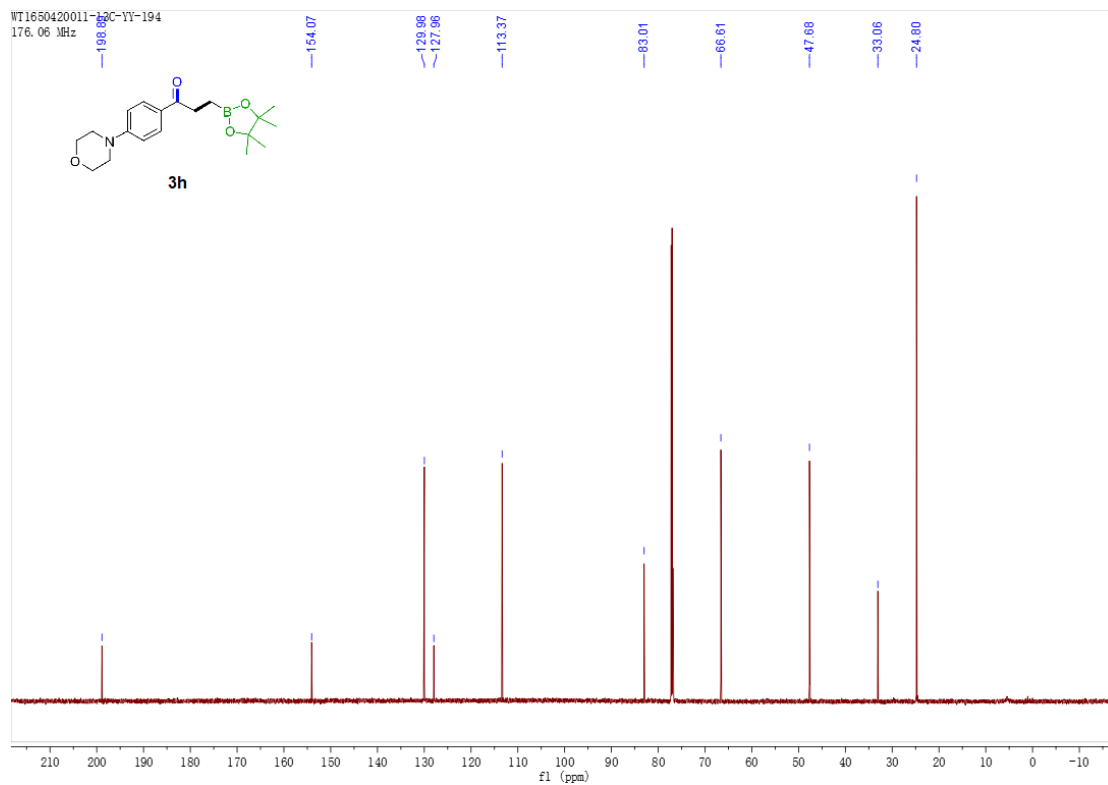

0692-YY-194  
B11ZG30 CDCl3 [D:\NMR400\DNL0604] nmrsu 14  
128.38 MHz

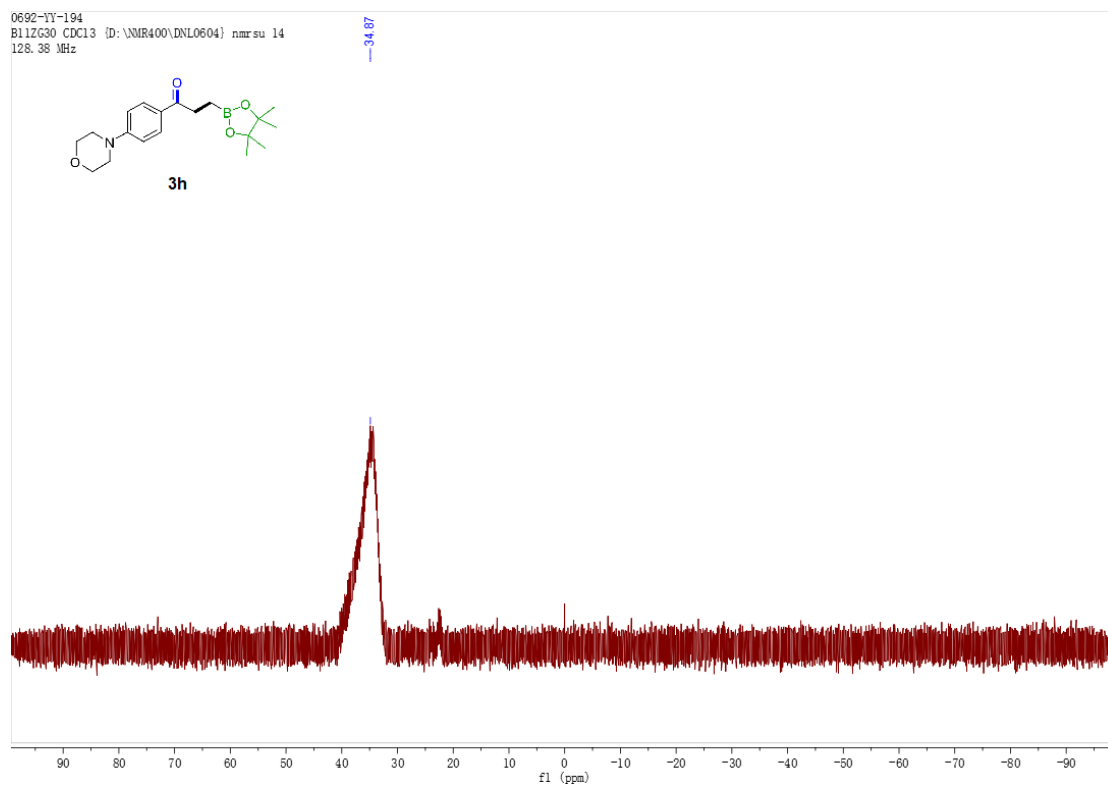

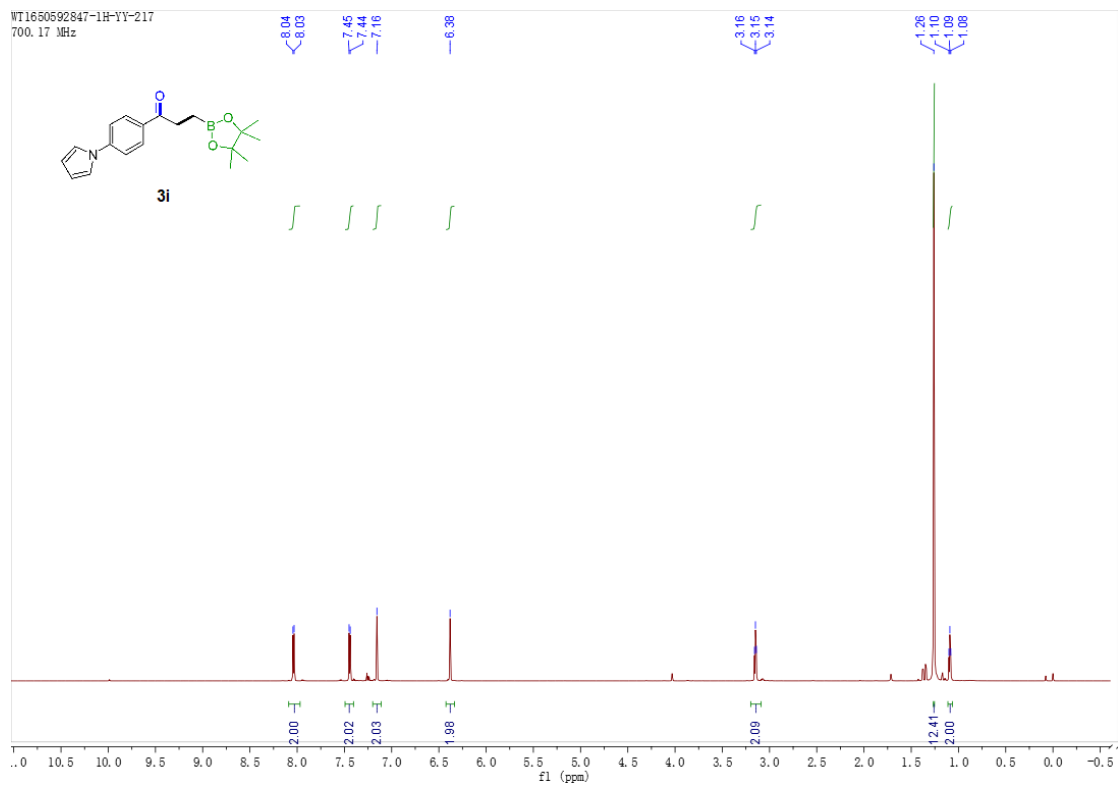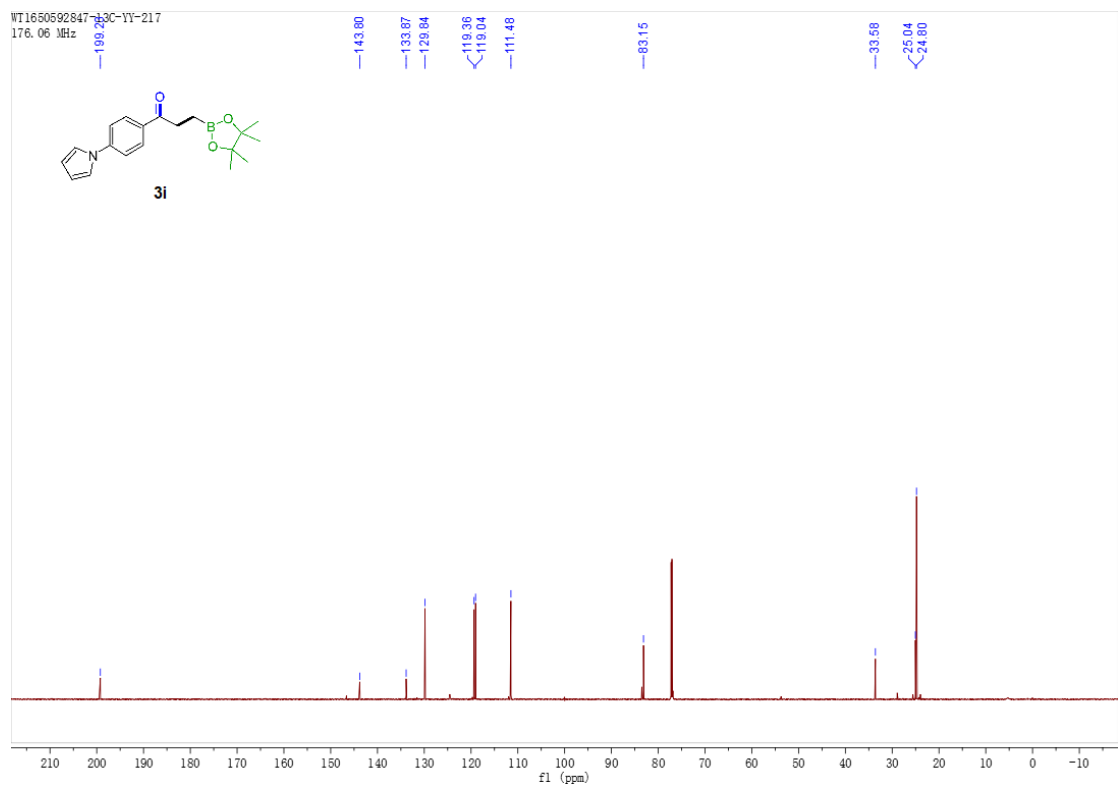

0692-YY-217  
B11ZG30 CDCl3 [D:\NMR400\DNL0604] nmrsu 26  
128.38 MHz

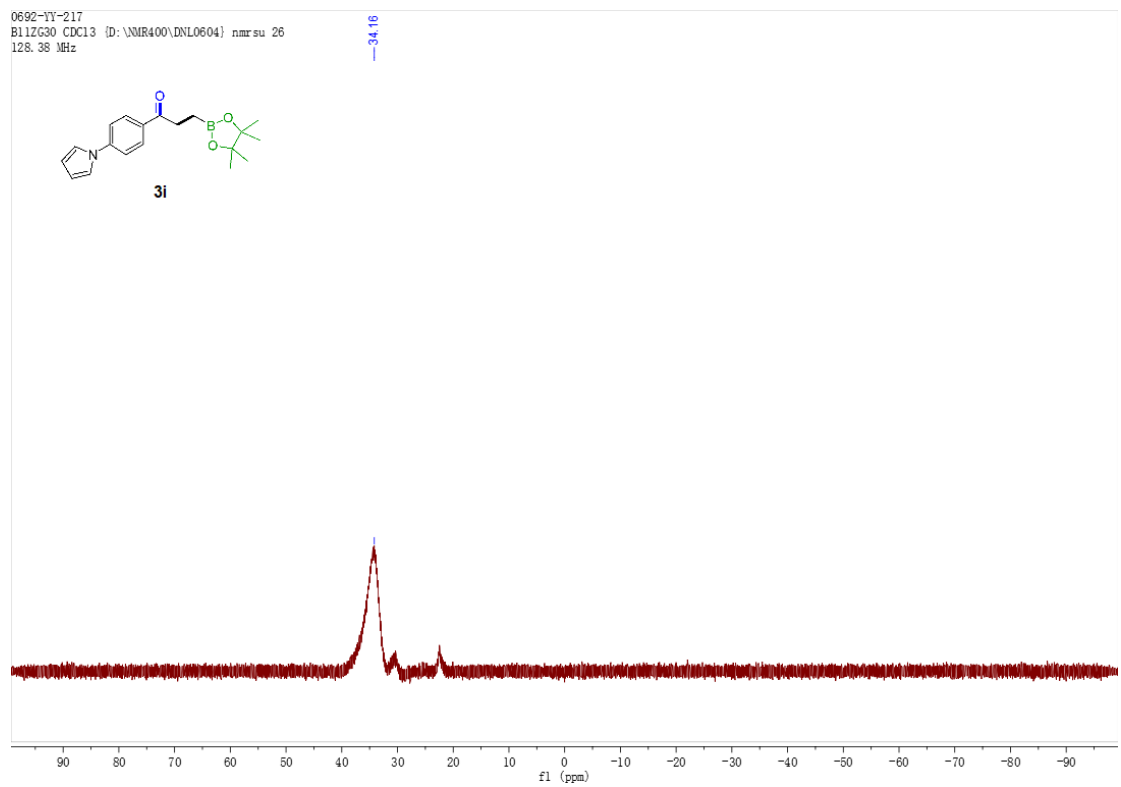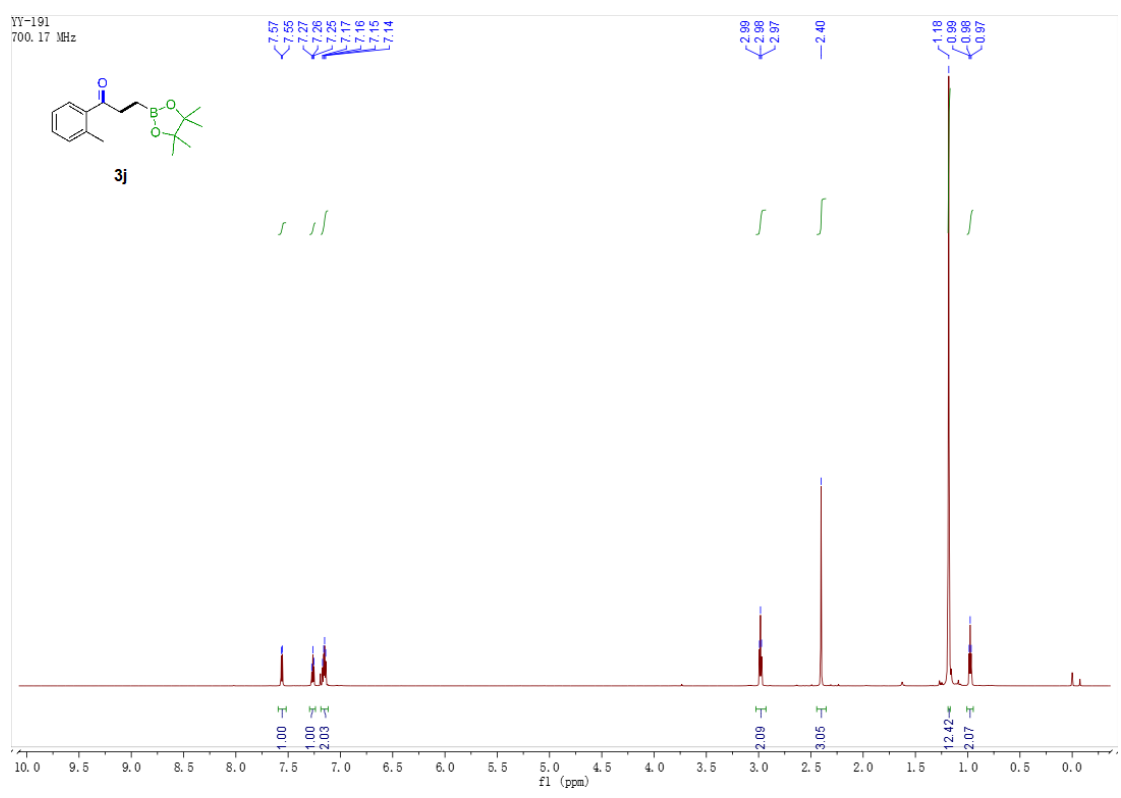



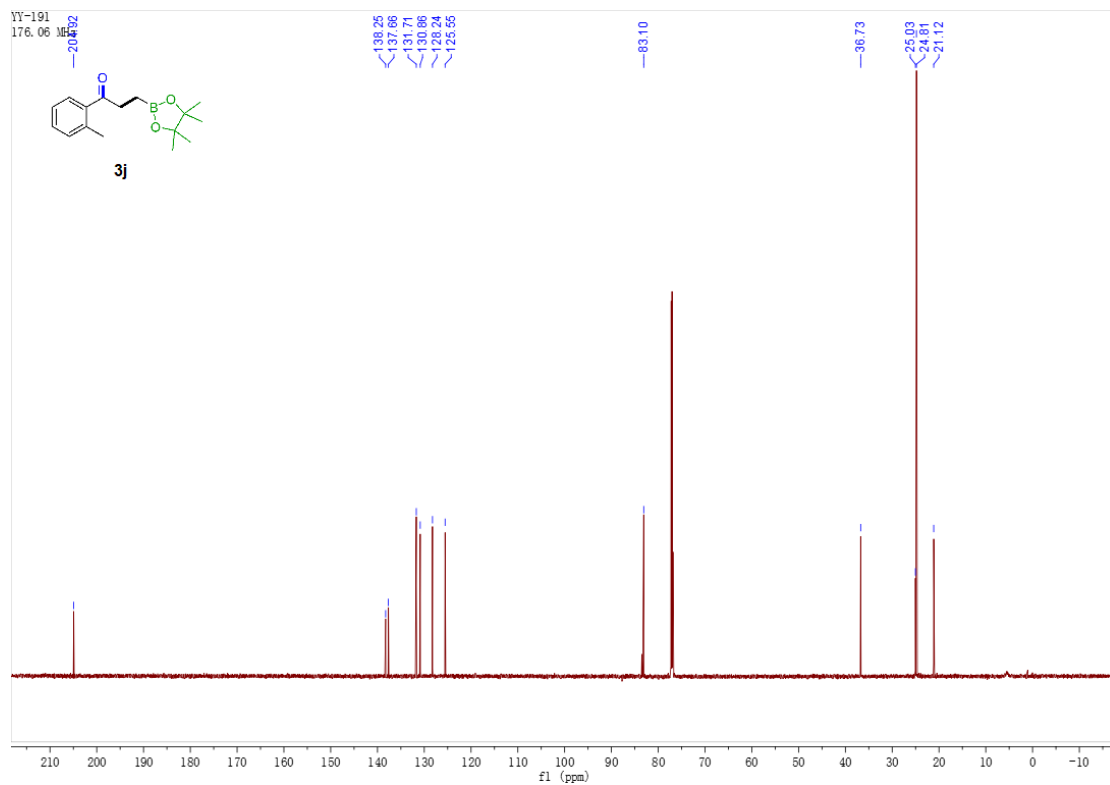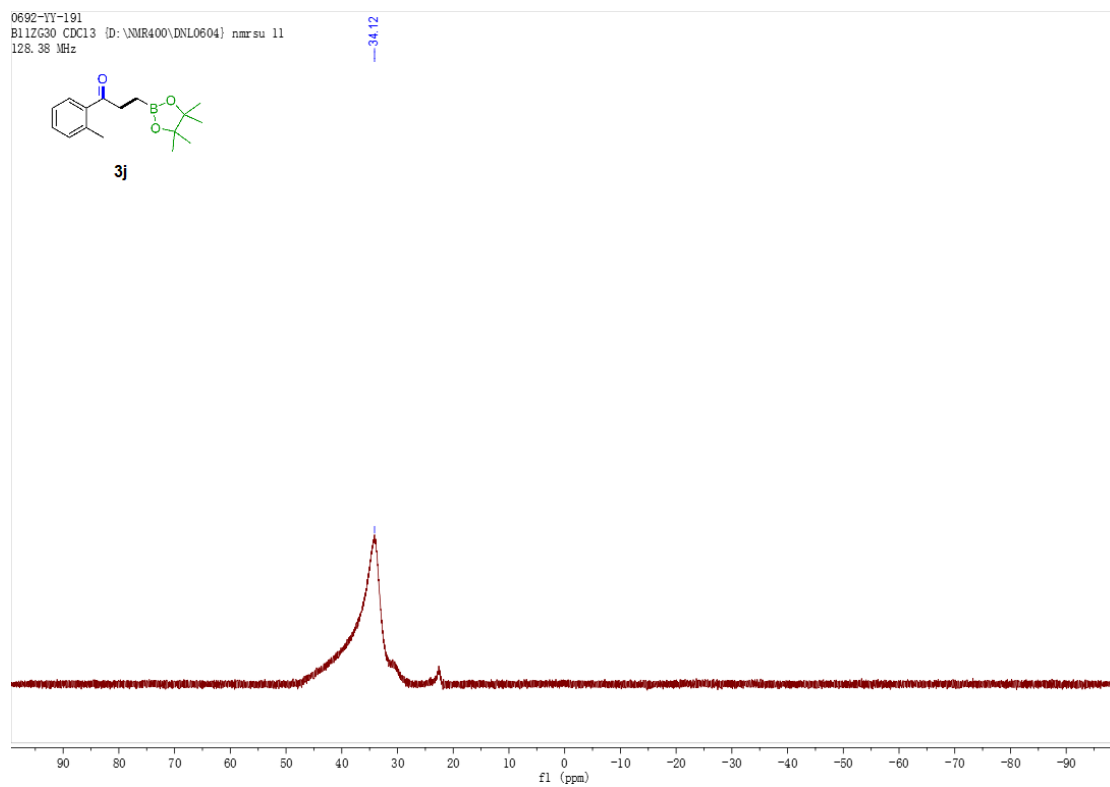

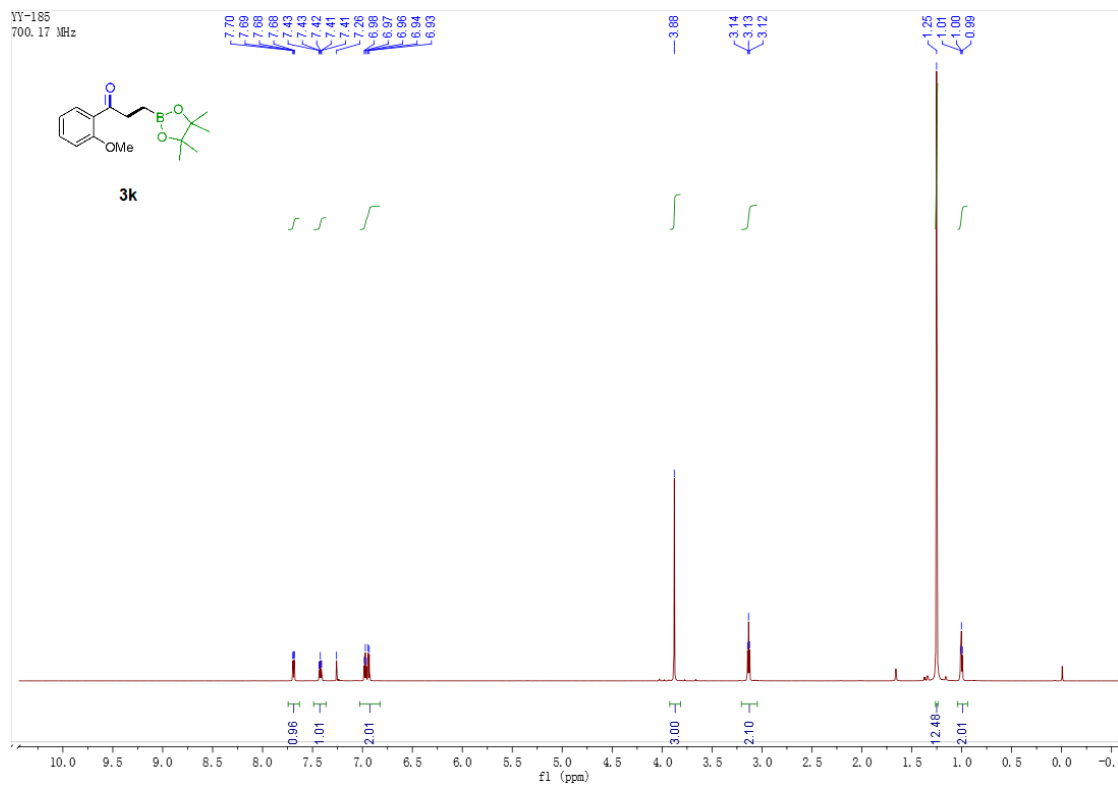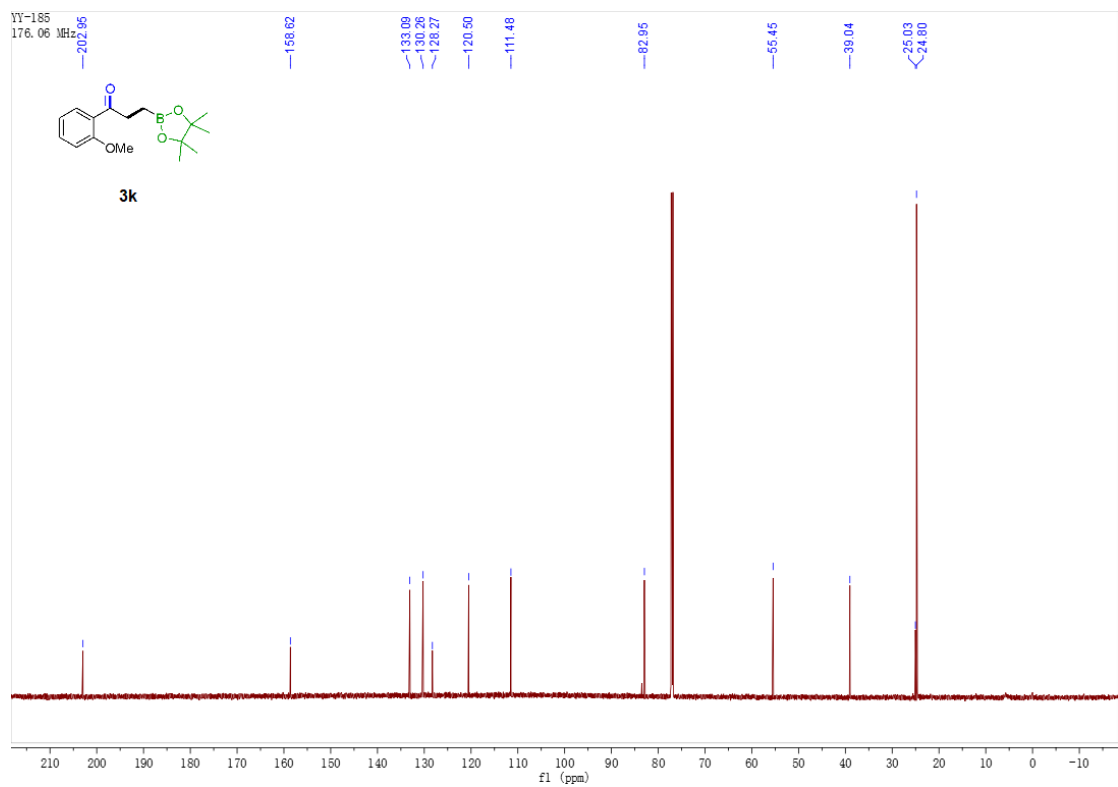

0692-YY-185  
B11ZG30 CDCl3 [D:\NMR400\DNL0604] nmr su 8  
128.38 MHz

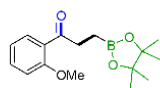

3k

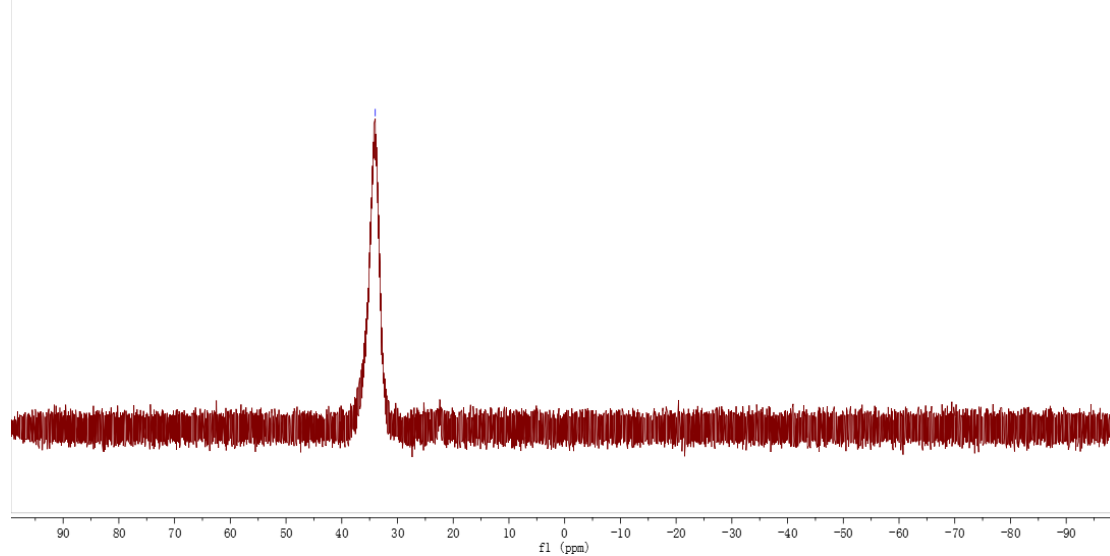

YY-188  
700.17 MHz

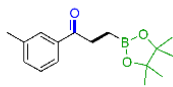

3m

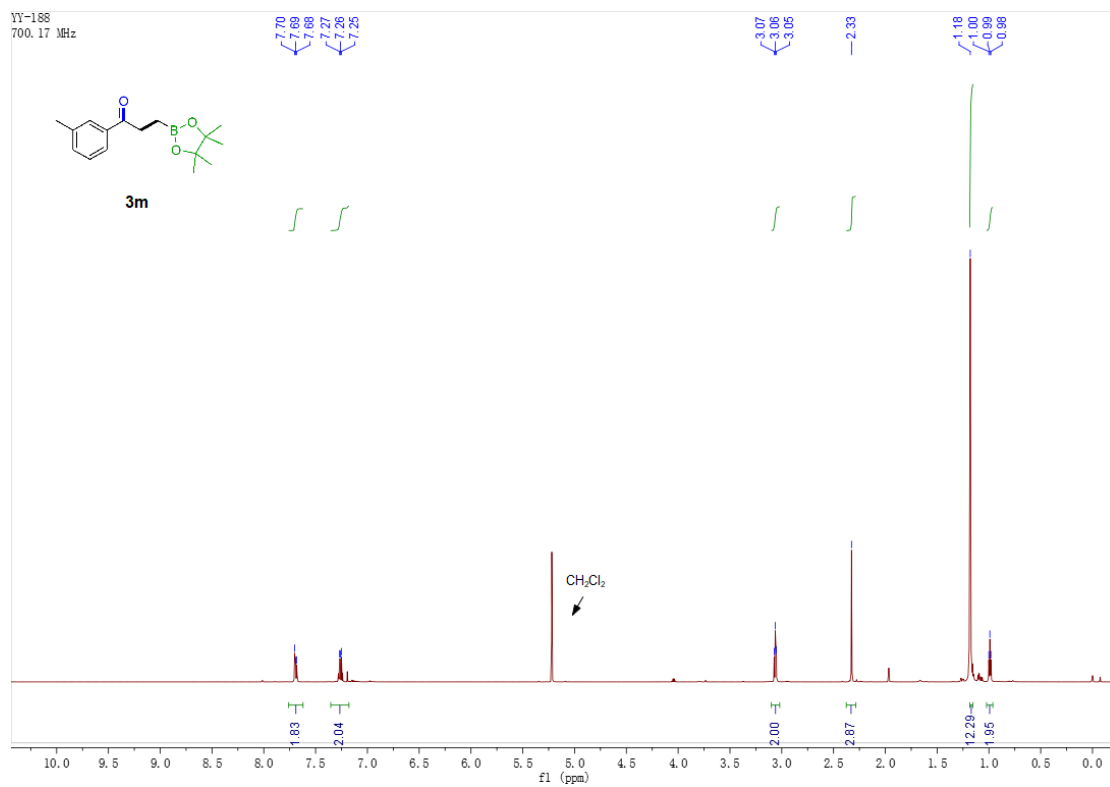

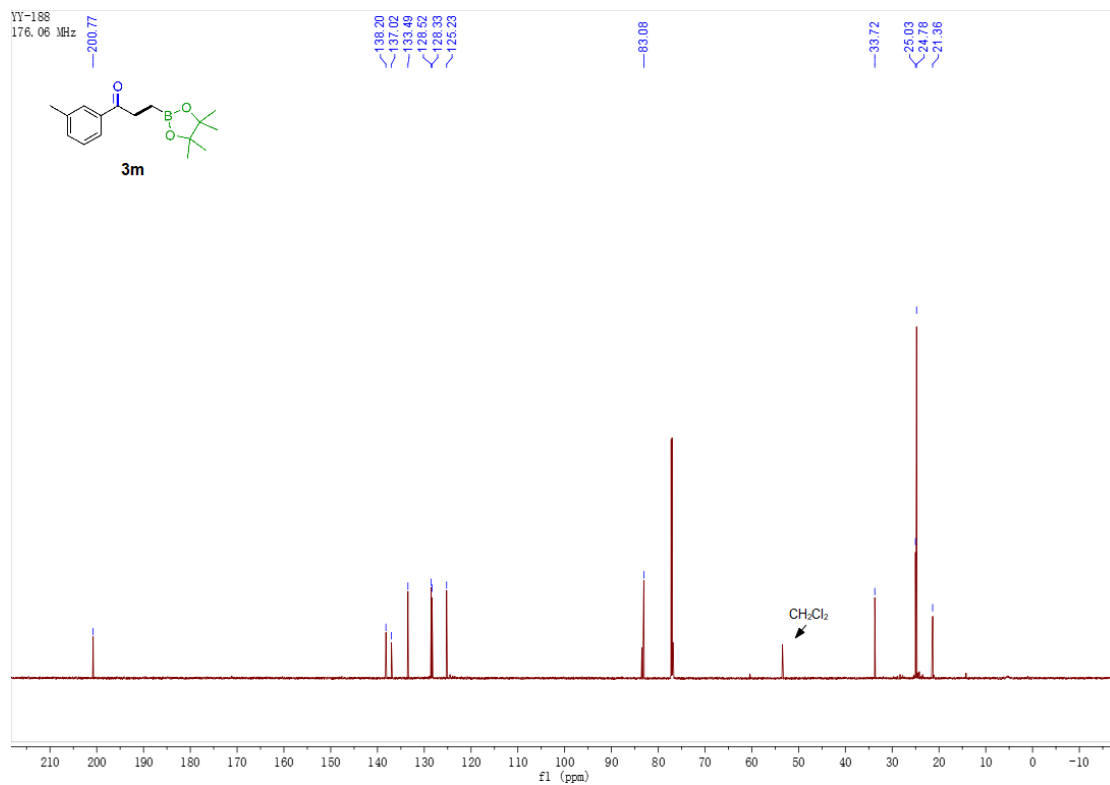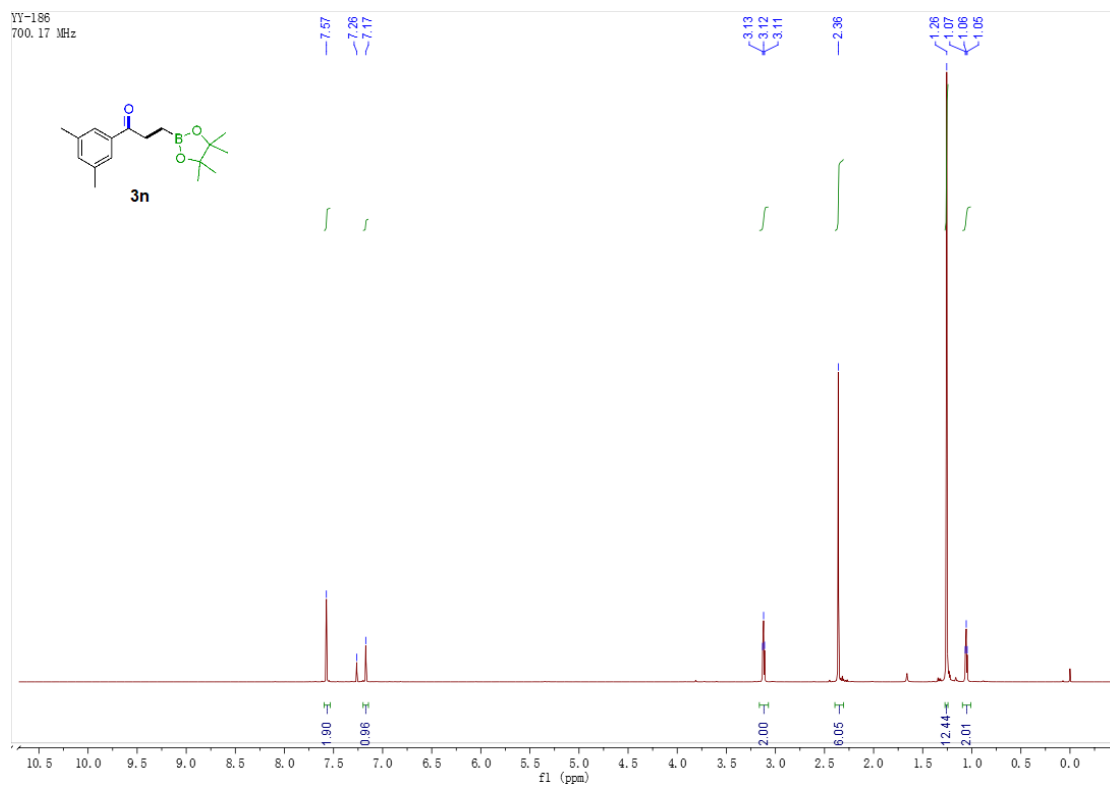

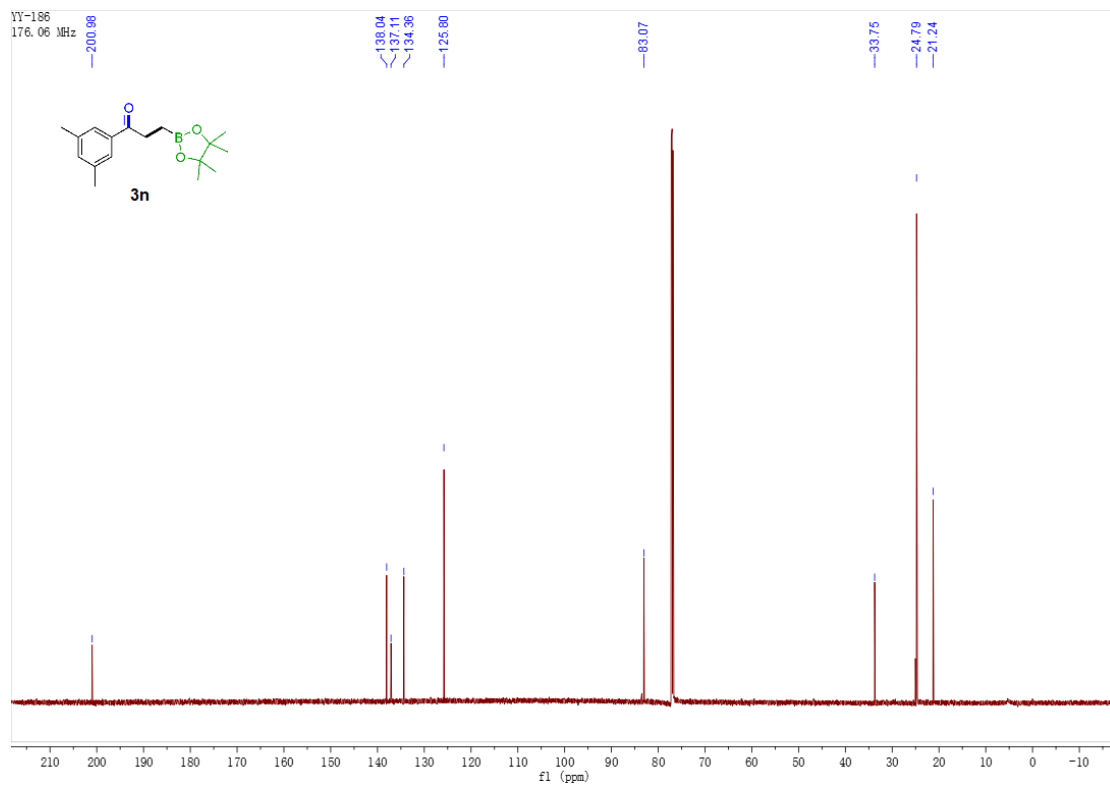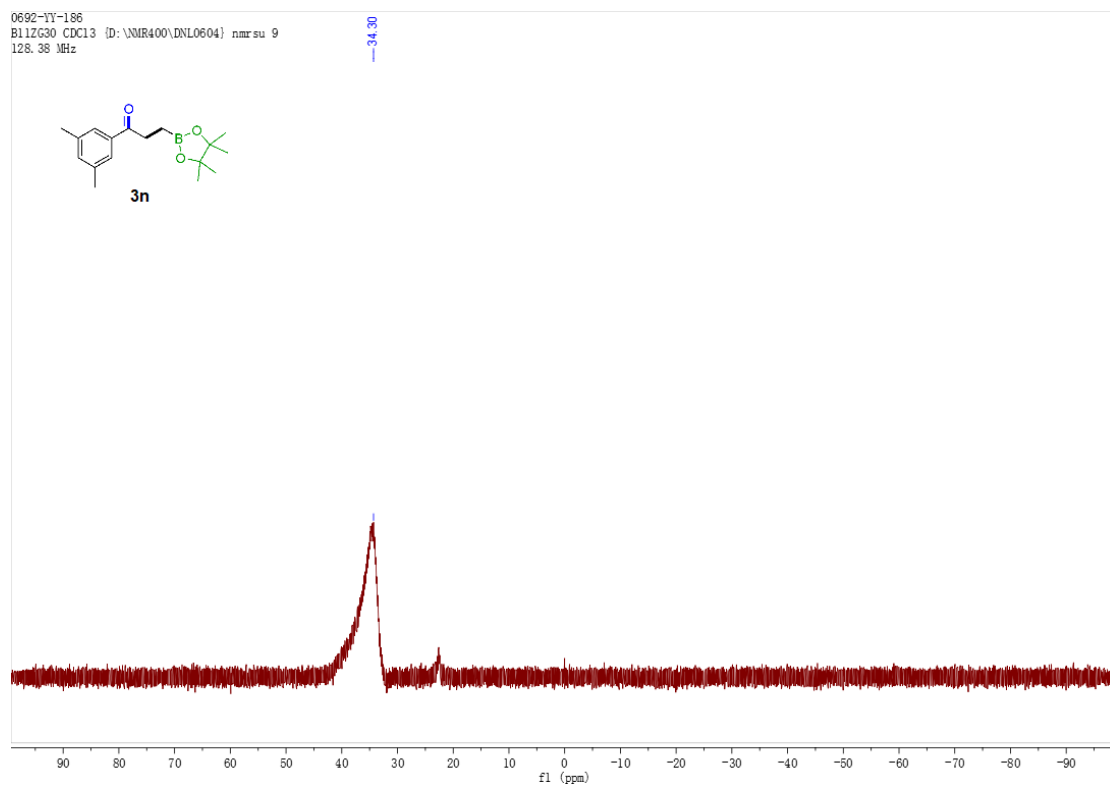

WT1650506422-1H-YY-202  
700.17 MHz

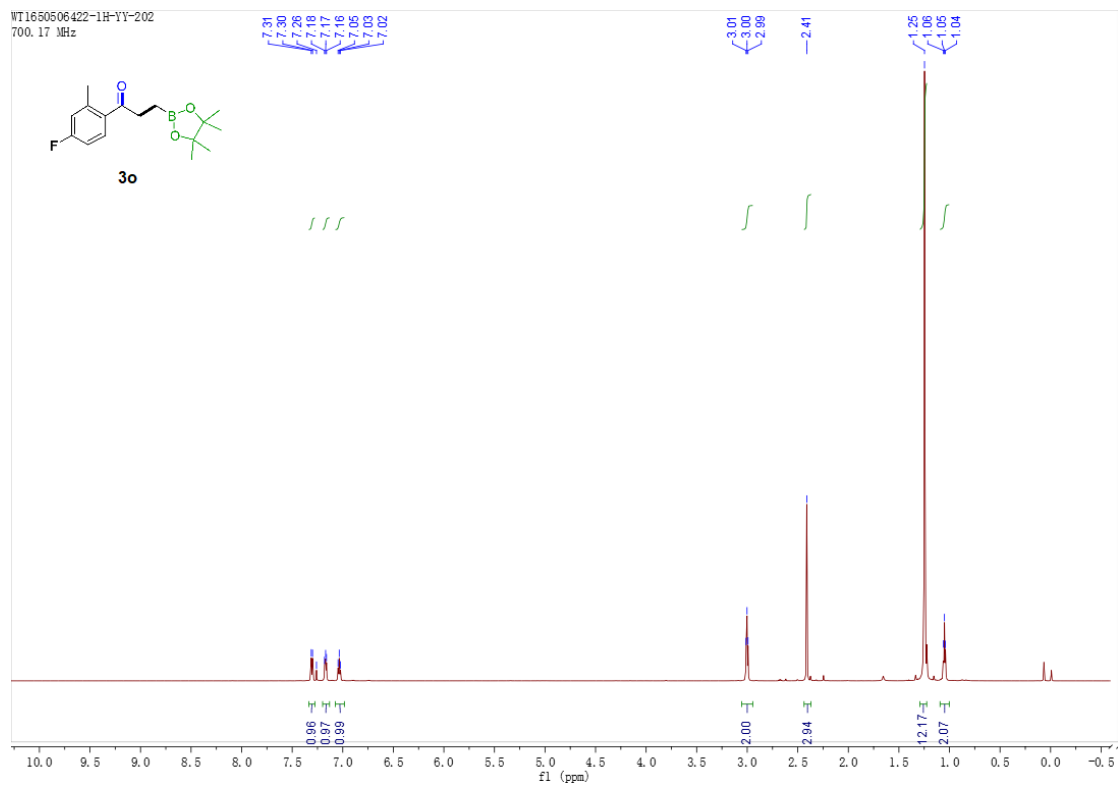

WT1650506422-13C-YY-202  
176.06 MHz

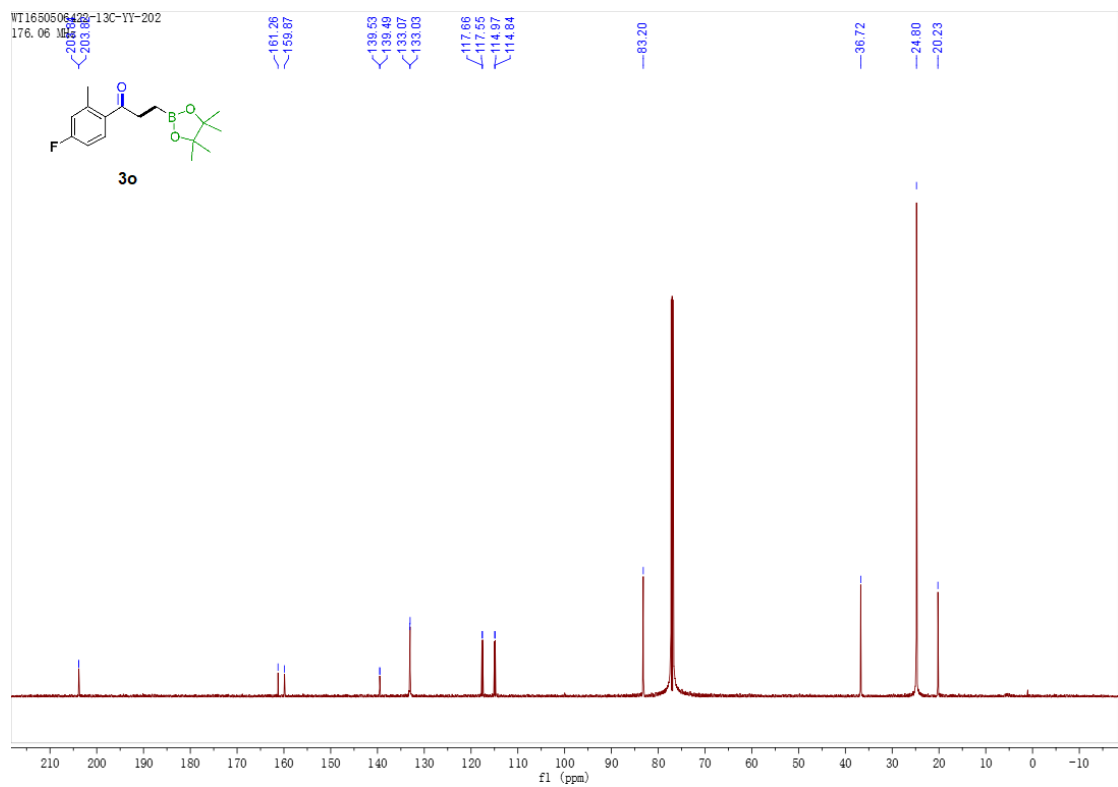

0680-YY-202  
F19 CDCl3 [D:\NMR400\DNL0604] nmr su 3  
376.50 MHz

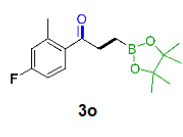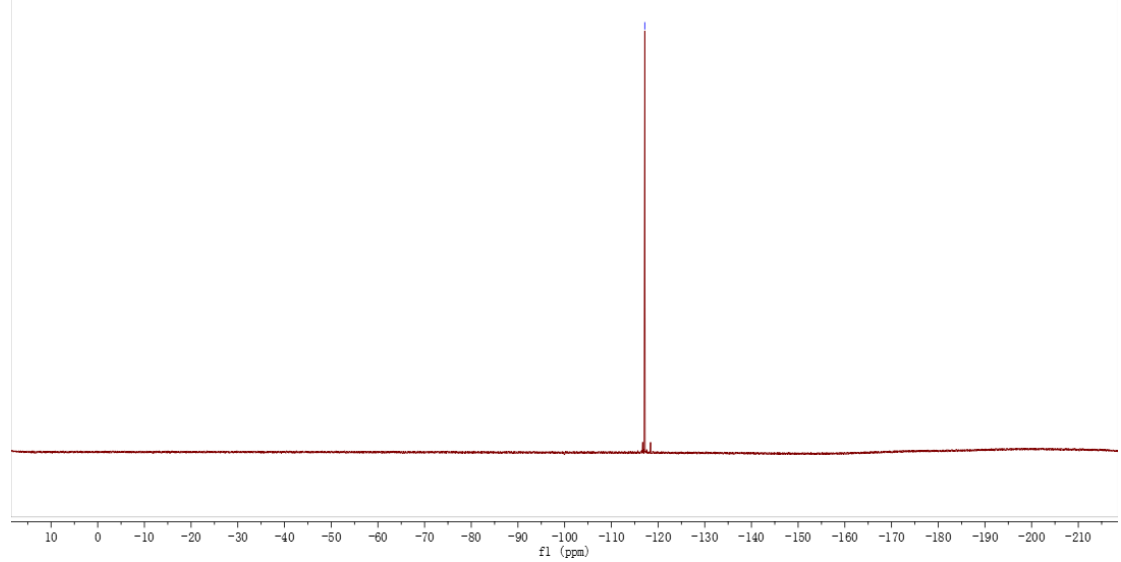

0680-YY-202  
B11ZG30 CDCl3 [D:\NMR400\DNL0604] nmr su 3  
128.38 MHz

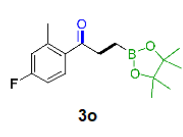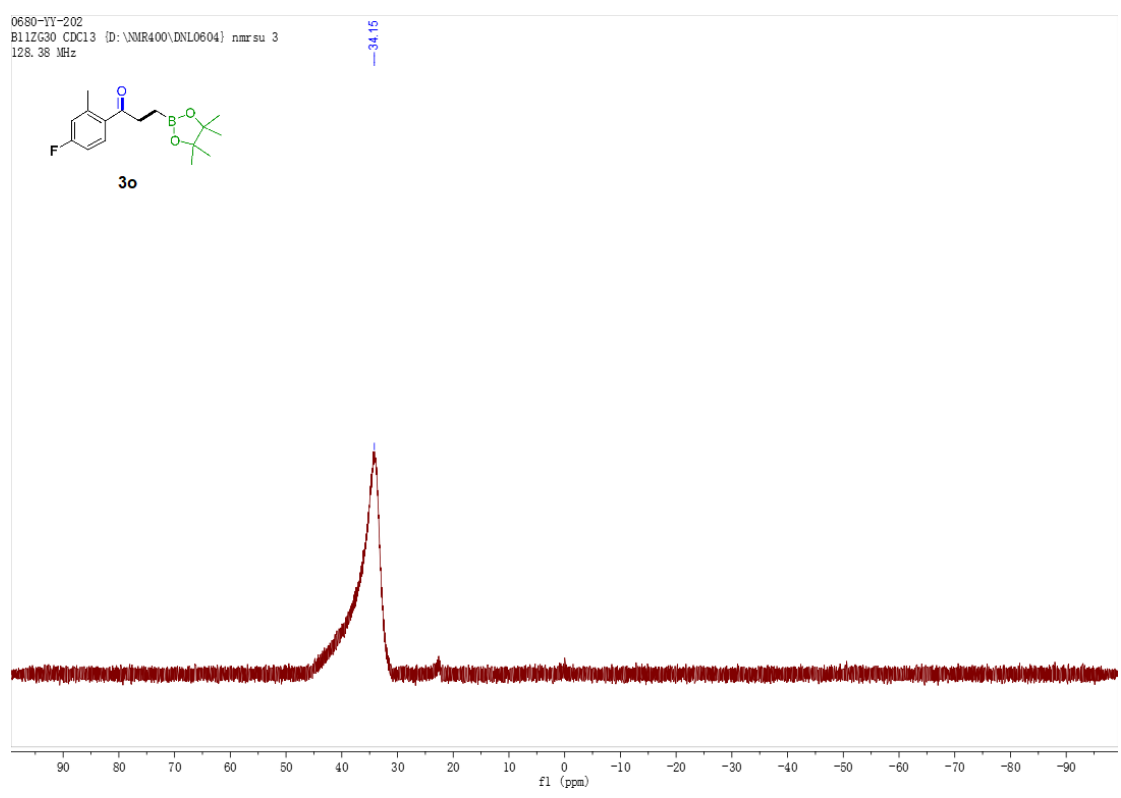

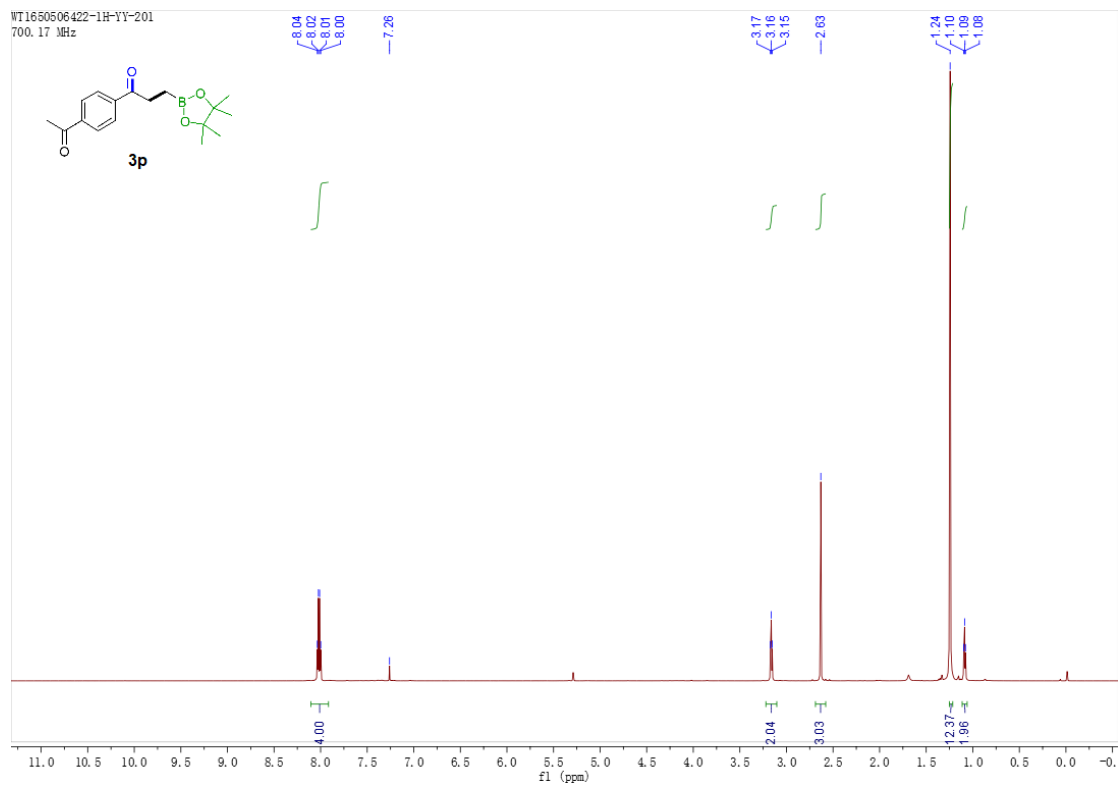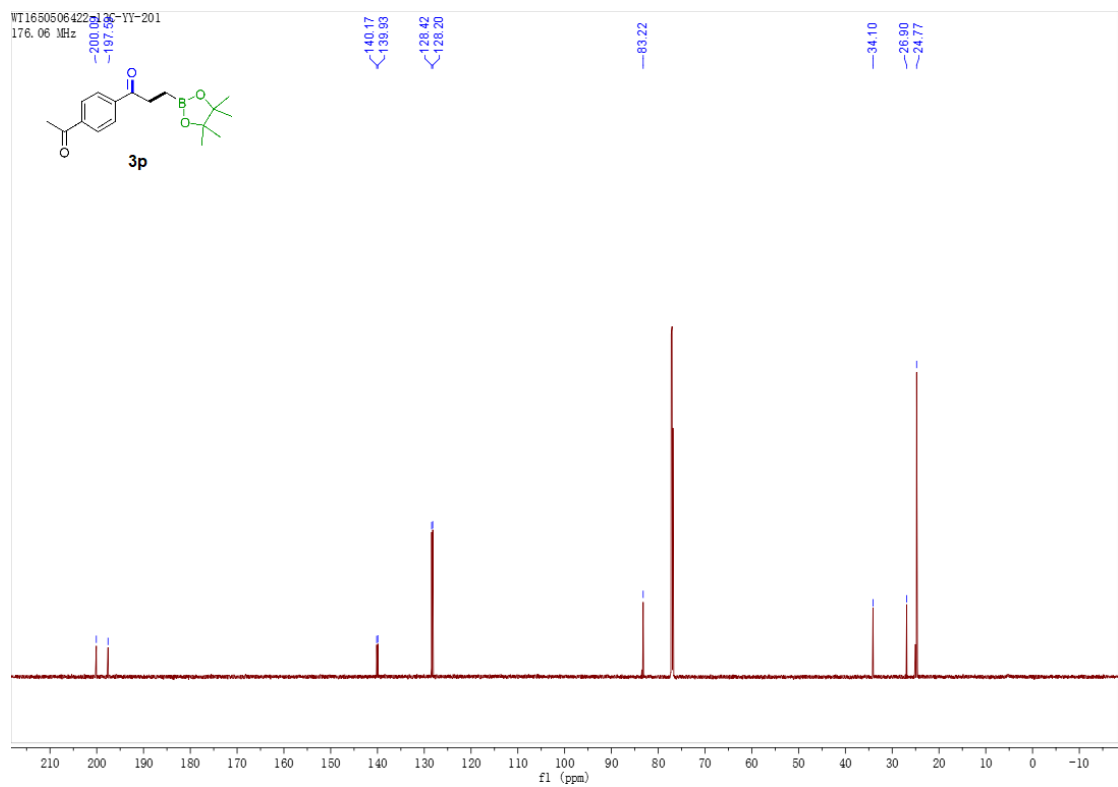



0692-YY-201  
B11ZG30 CDCl3 [D:\NMR400\DNL0604] nmrsu 16  
128.38 MHz

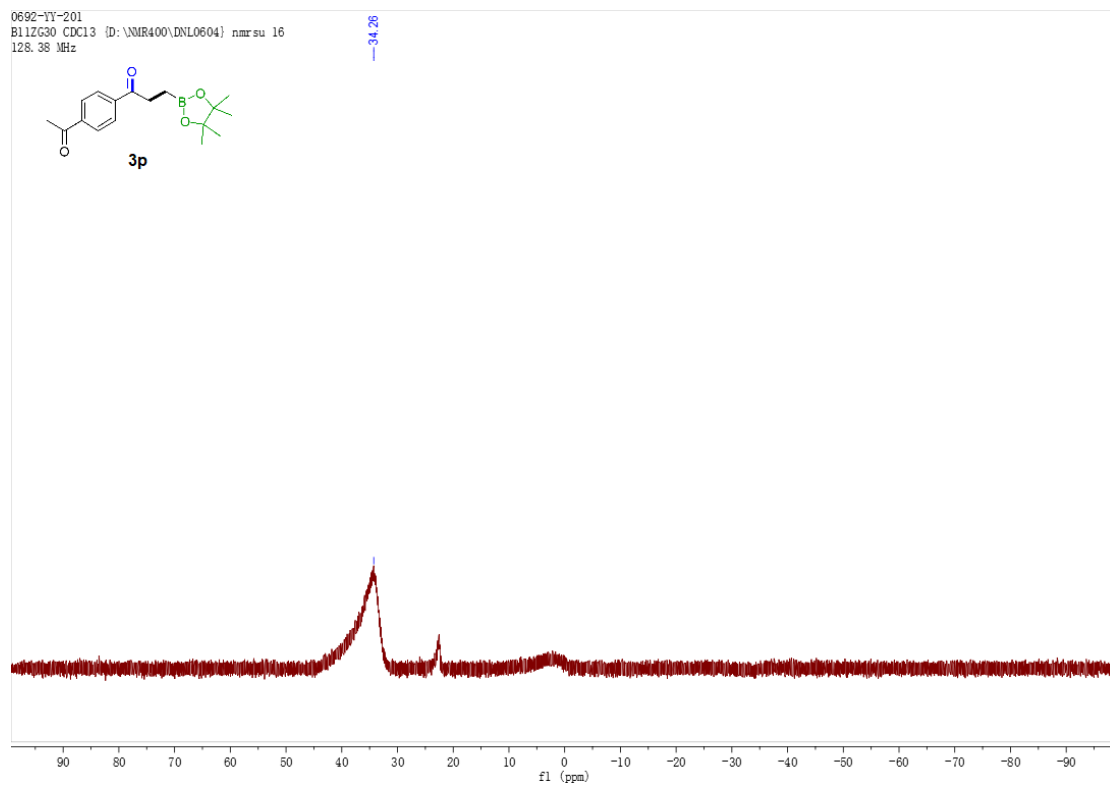

WT1650506422-1H-YY-206  
700.17 MHz

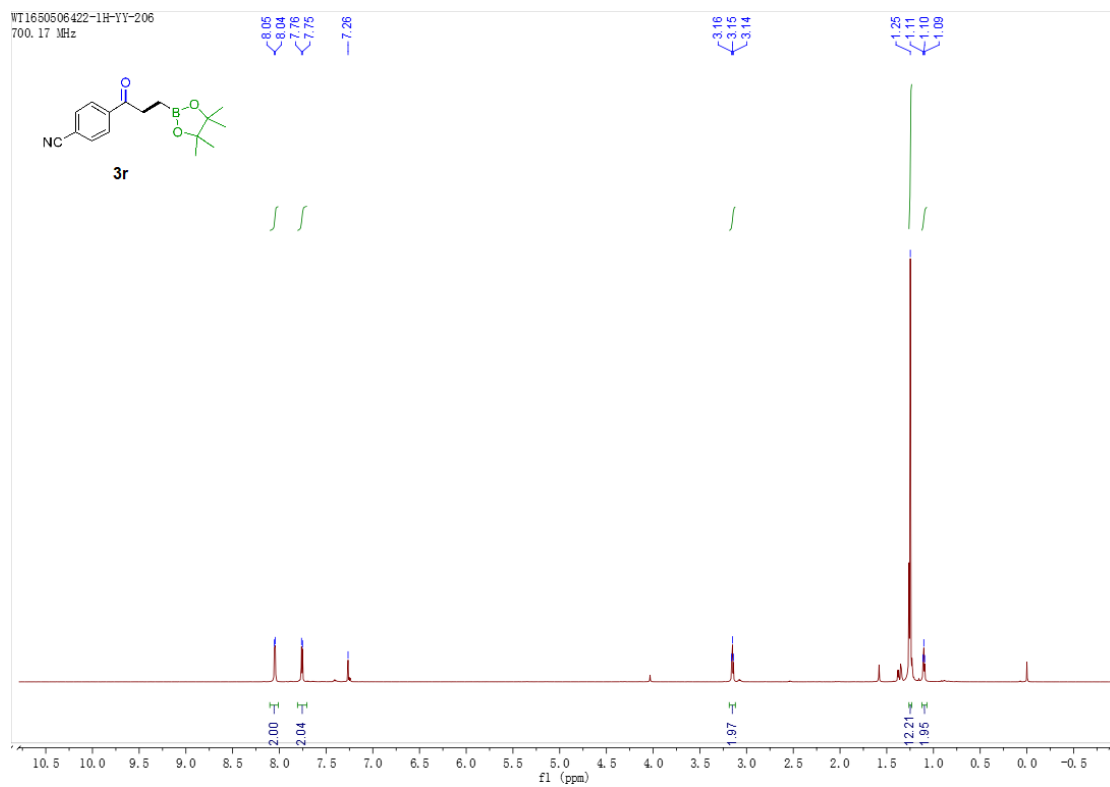

WT1650506422-33C-YY-206  
176.06 MHz

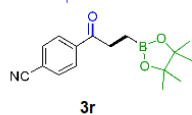

136.94  
132.44  
128.43  
118.07  
116.08  
83.29  
34.05  
25.04  
24.77

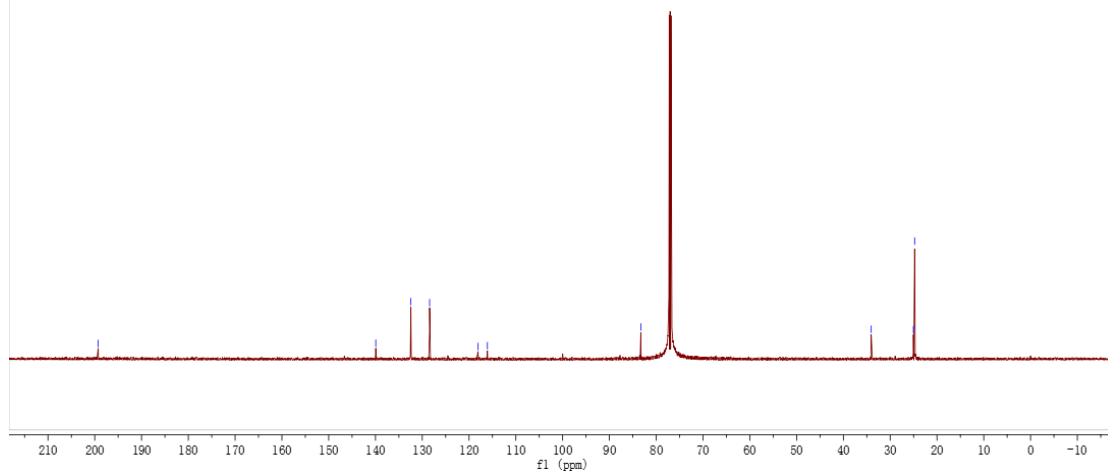

0692-YY-206  
B11ZG30 CDCl3 [D:\NMR400\DNL0604] nmr su 19  
128.38 MHz

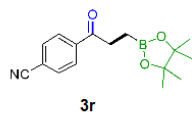

33.88

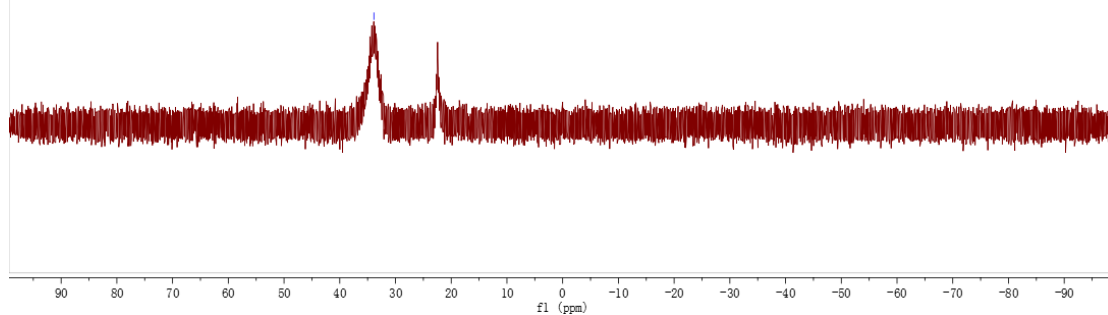

WT1650592847-1H-YY-216  
700.17 MHz

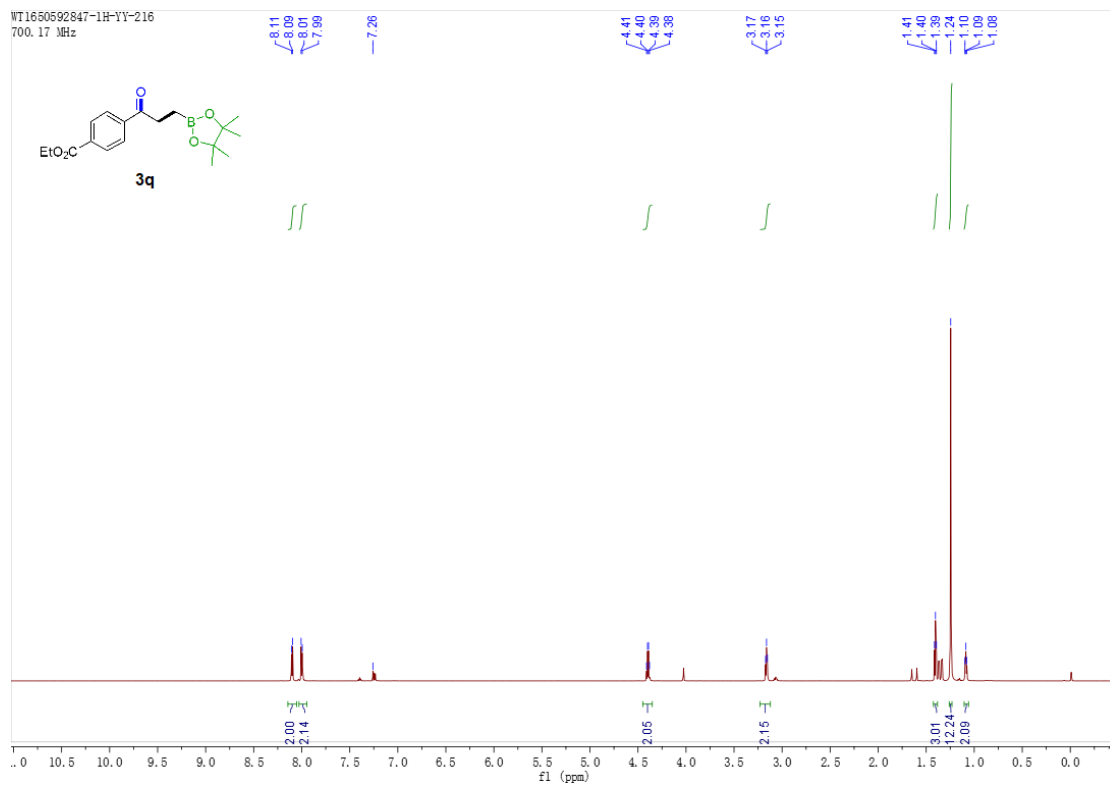

WT1650592847-13C-YY-216  
176.06 MHz

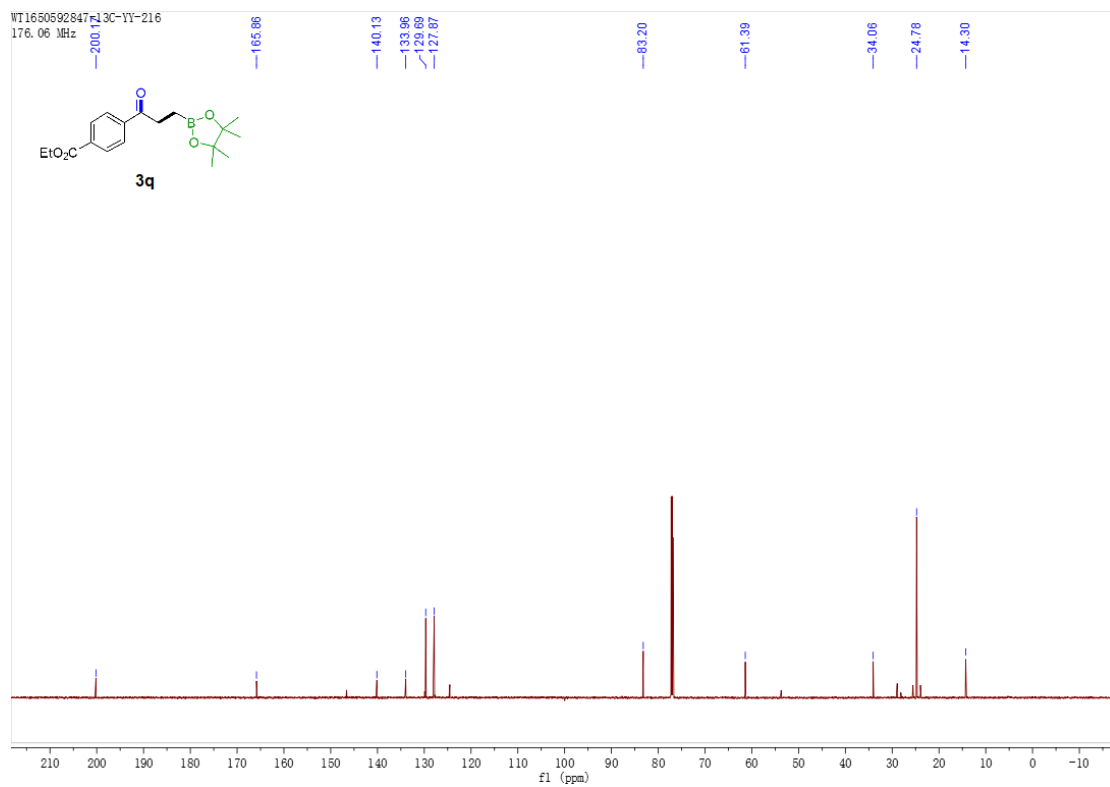

0692-YY-216  
B11ZG30 CDCl3 [D:\NMR400\DNL0604] nmrsu 25  
128.38 MHz

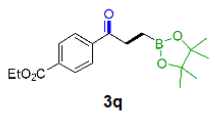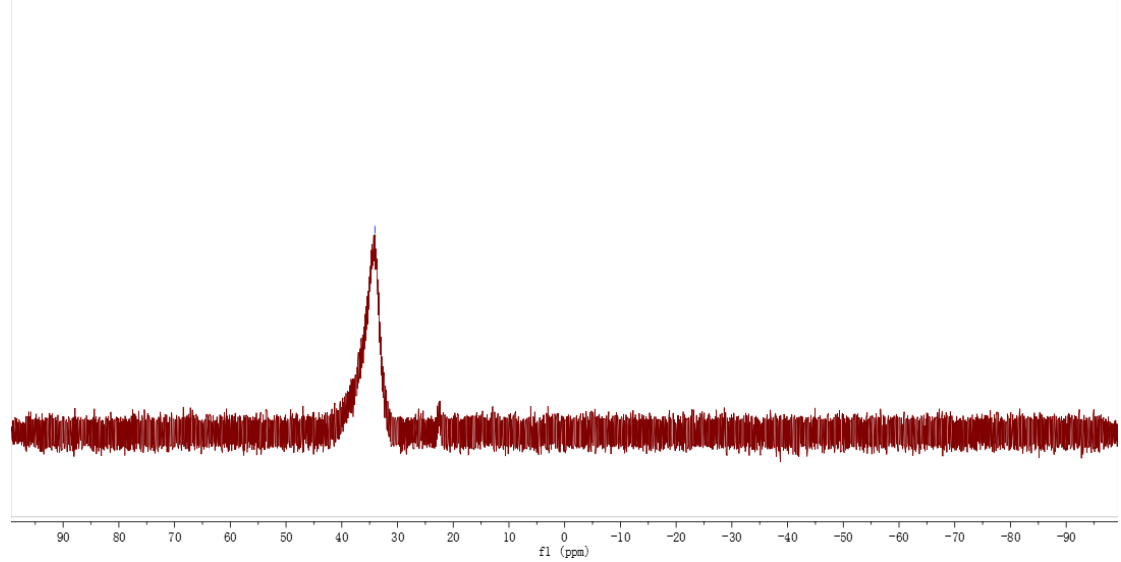

WT1650506422-1H-YY-197  
700.17 MHz

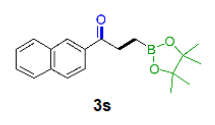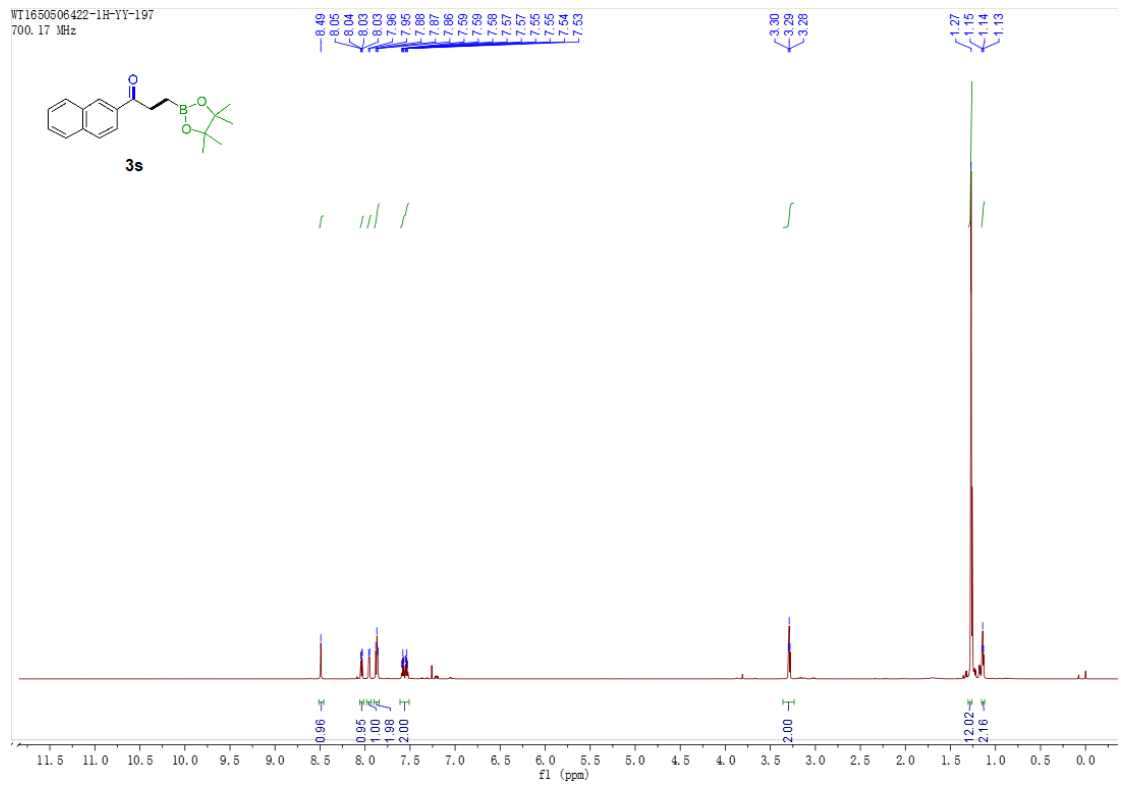

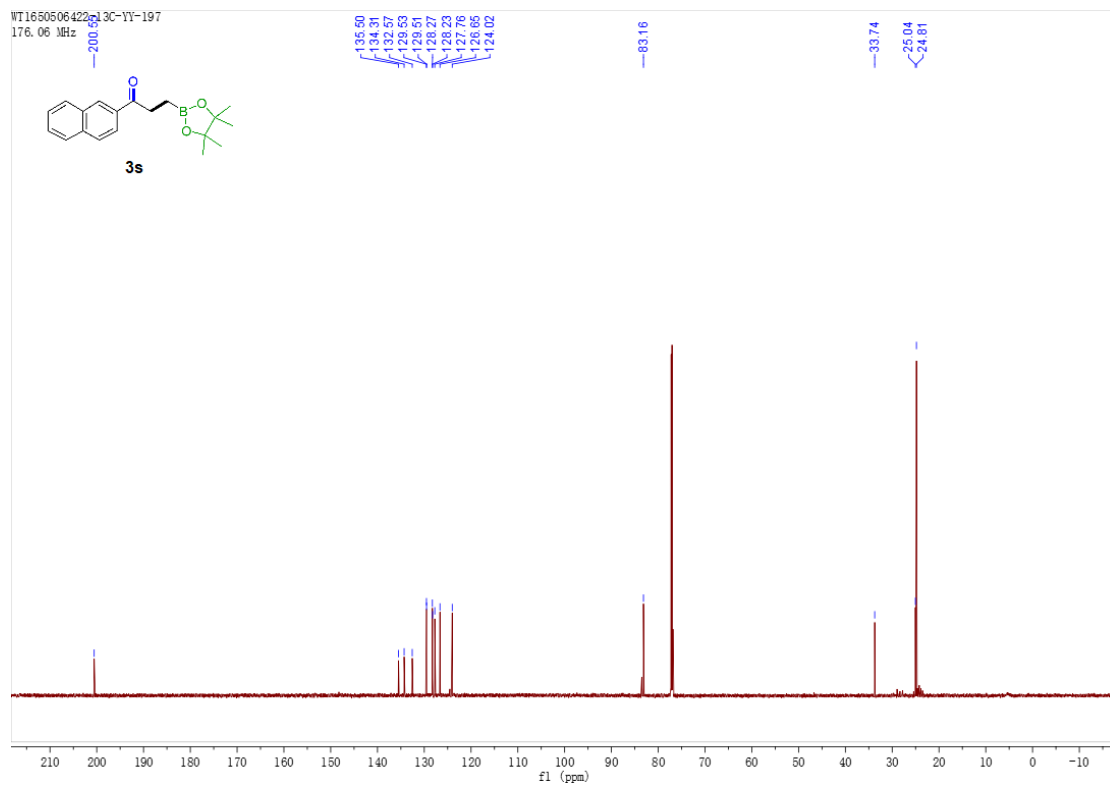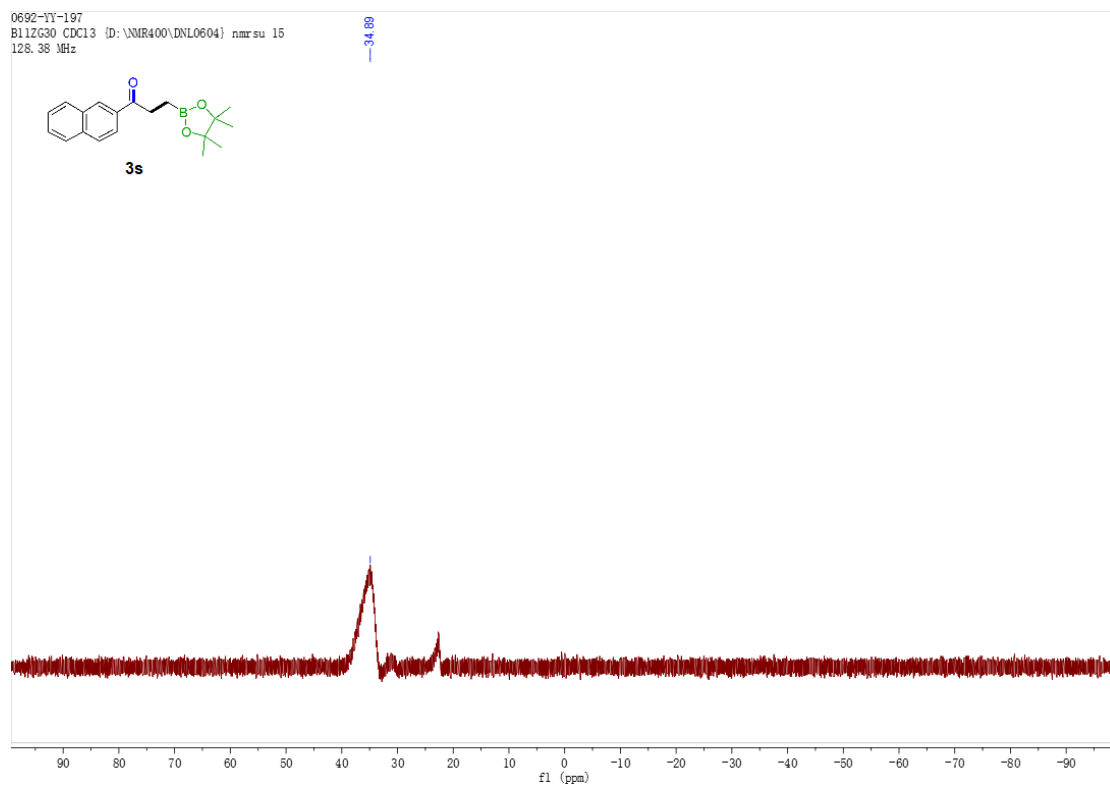

WT1650592847-1H-YY-215  
700.17 MHz

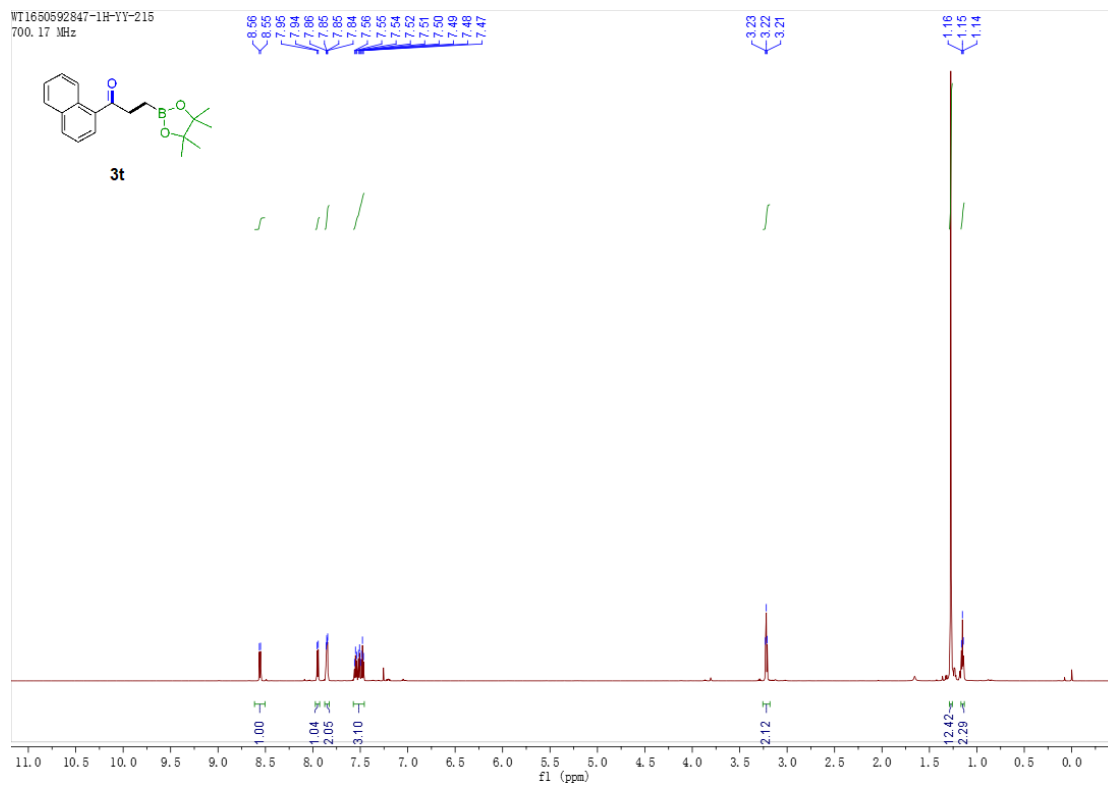

WT1650592847-13C-YY-215  
176.06 MHz

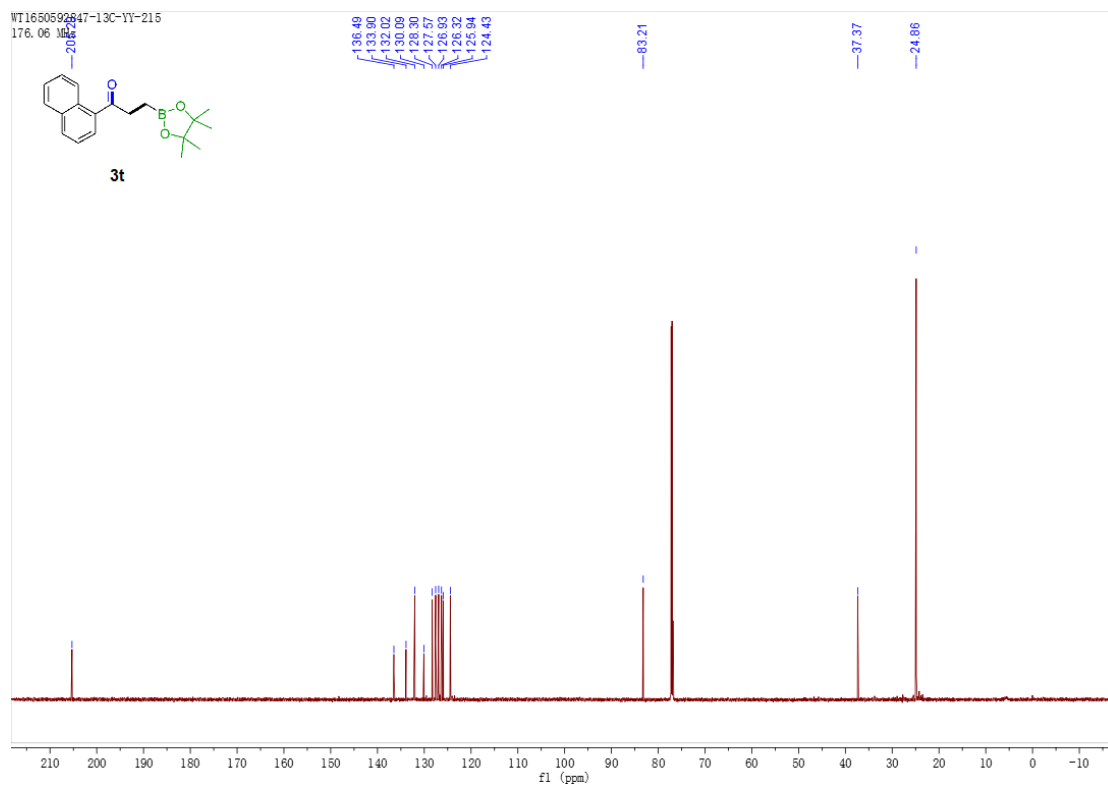

0692-YY-215  
B11ZG30 CDCl3 [D:\NMR400\DNL0604] nmrsu 24  
128.38 MHz

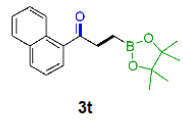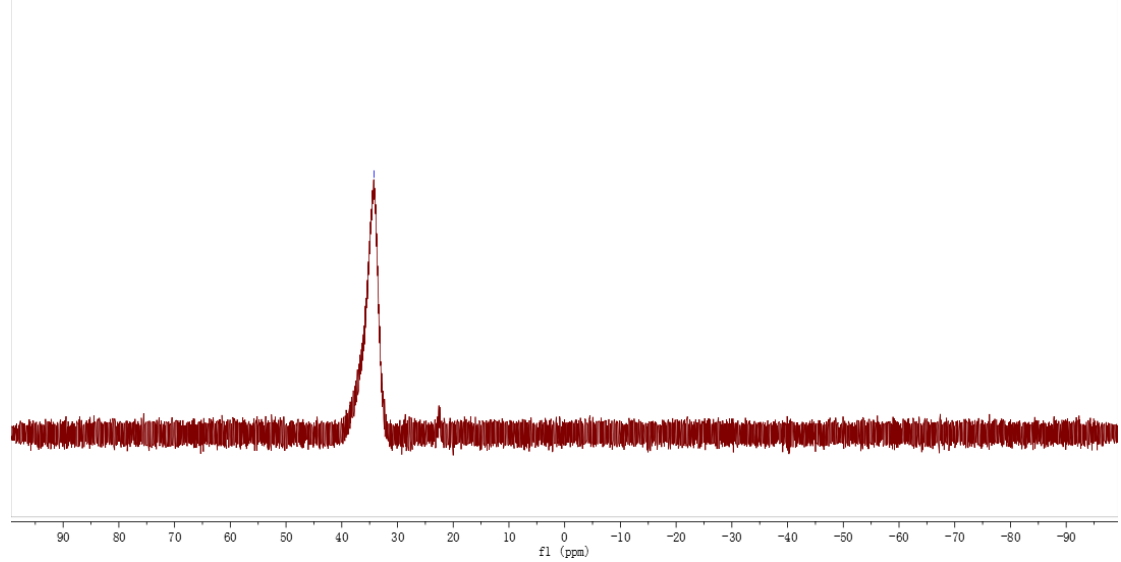

YY-193  
700.17 MHz

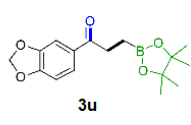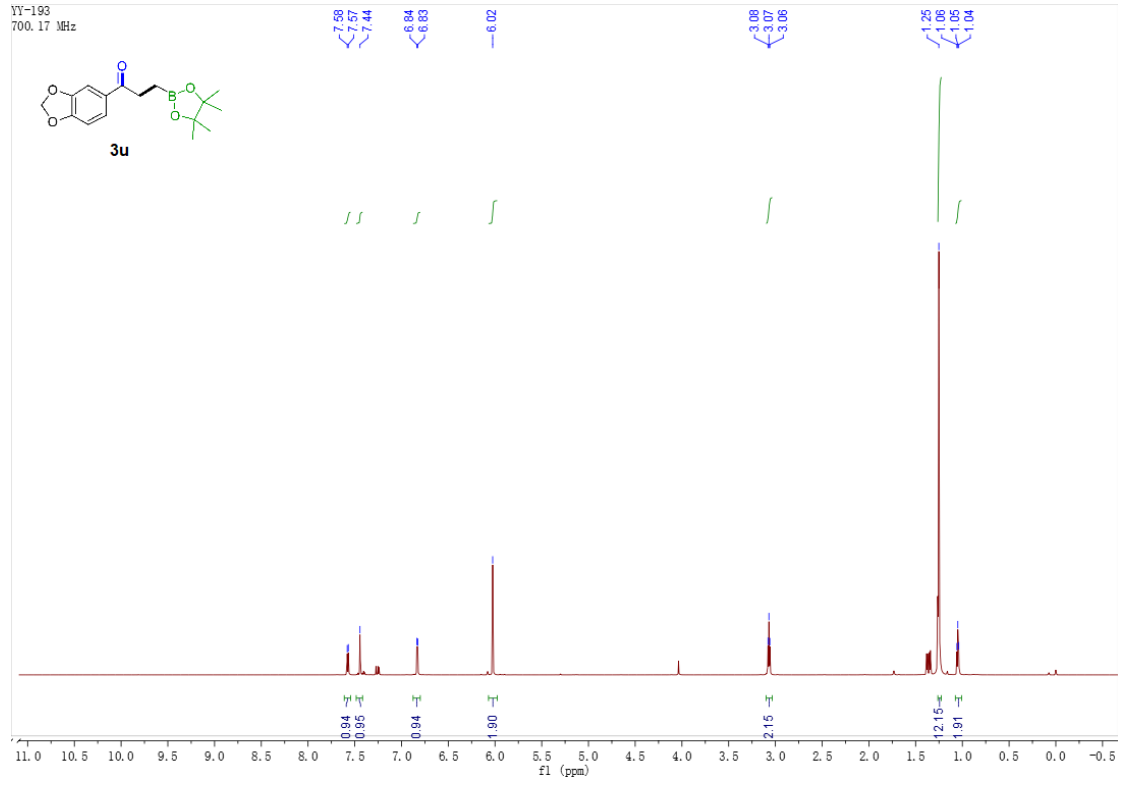

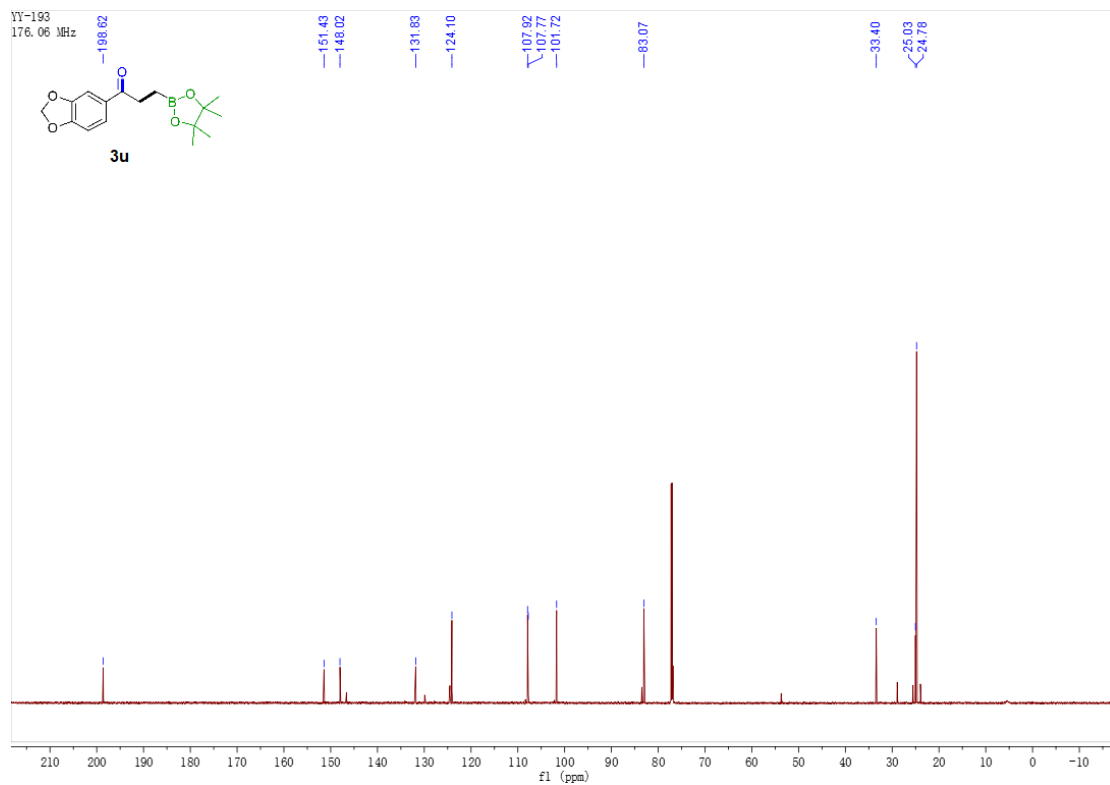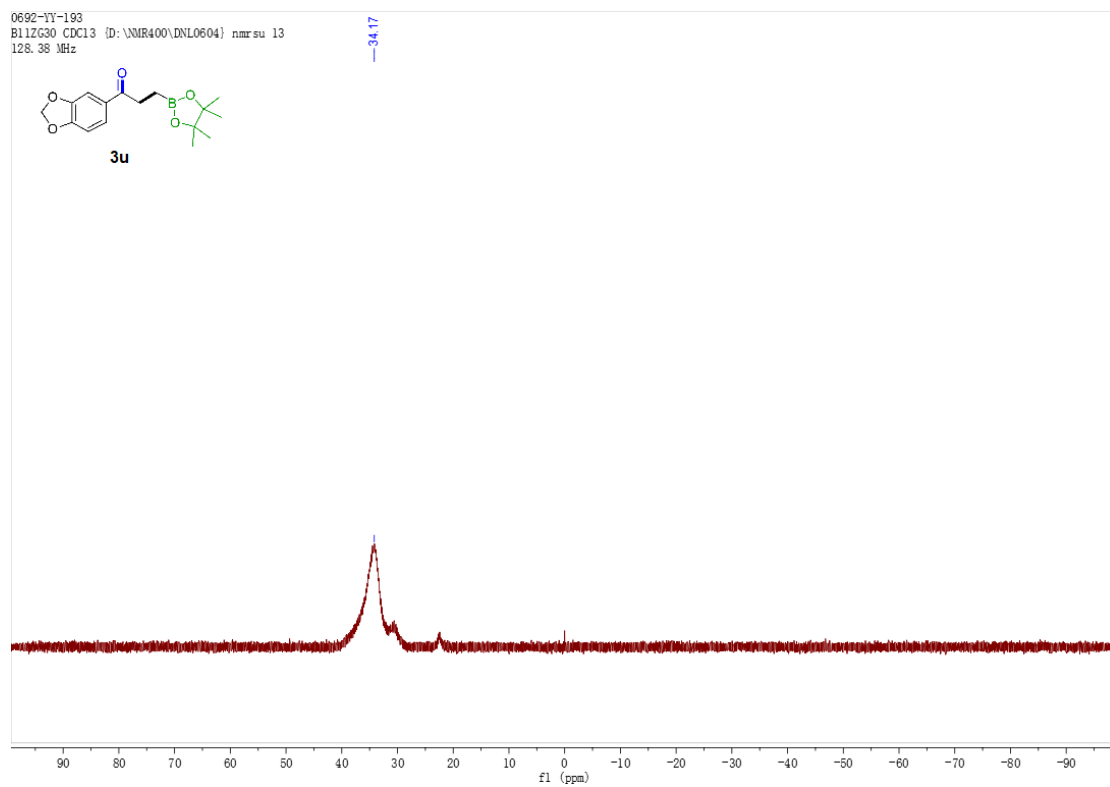



WT1650420011-1H-YY-195  
700.17 MHz

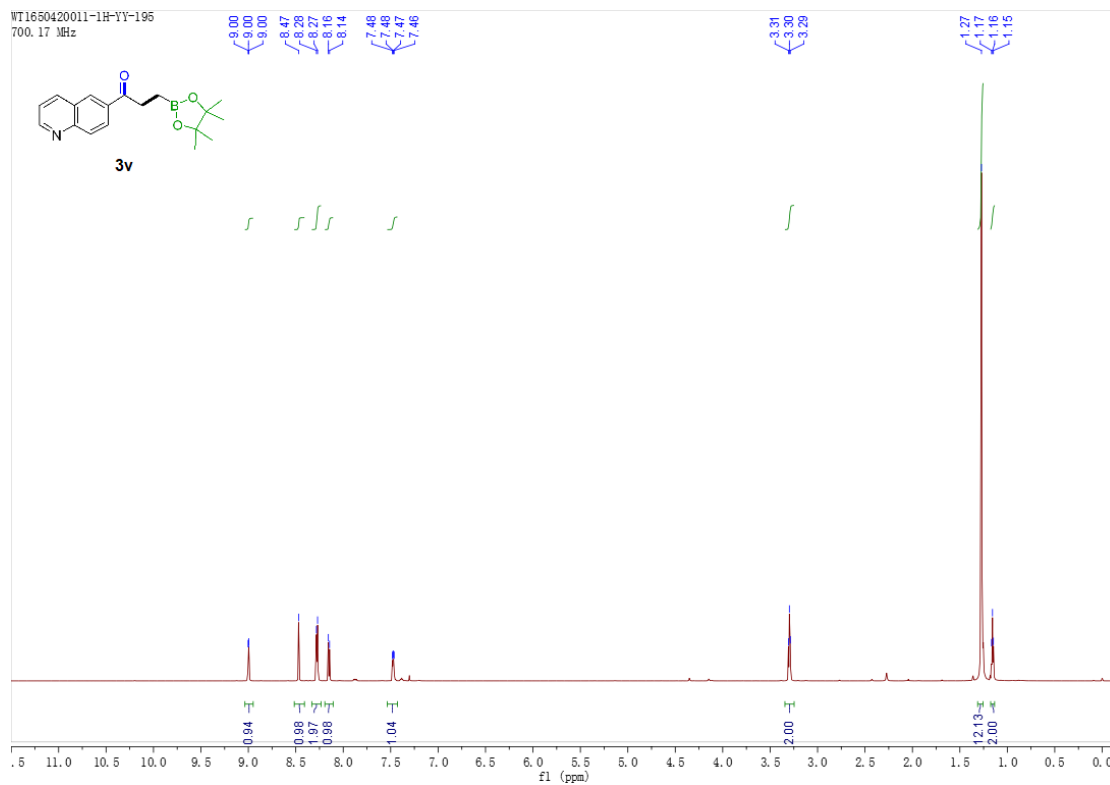

WT1650420011-13C-YY-195  
176.06 MHz

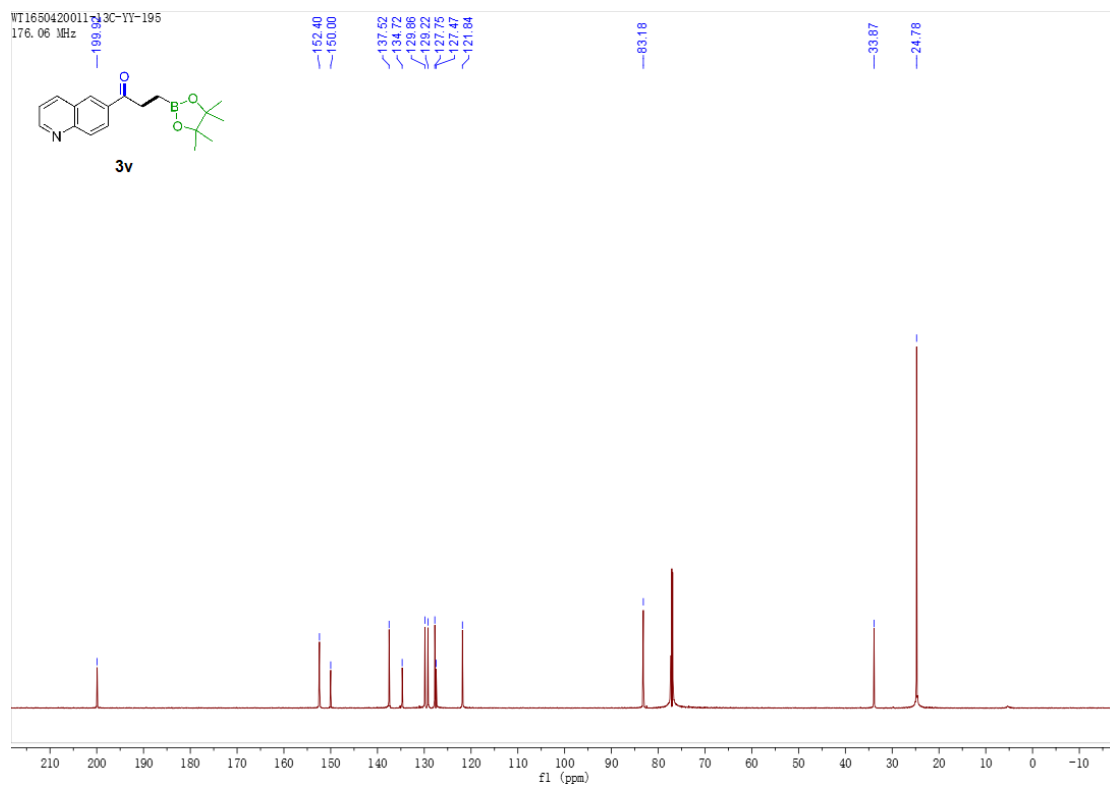

0690-YY-195  
B112G30 CDCl3 [D:\NMR400\DNL0604] nmrsu 2  
128.38 MHz

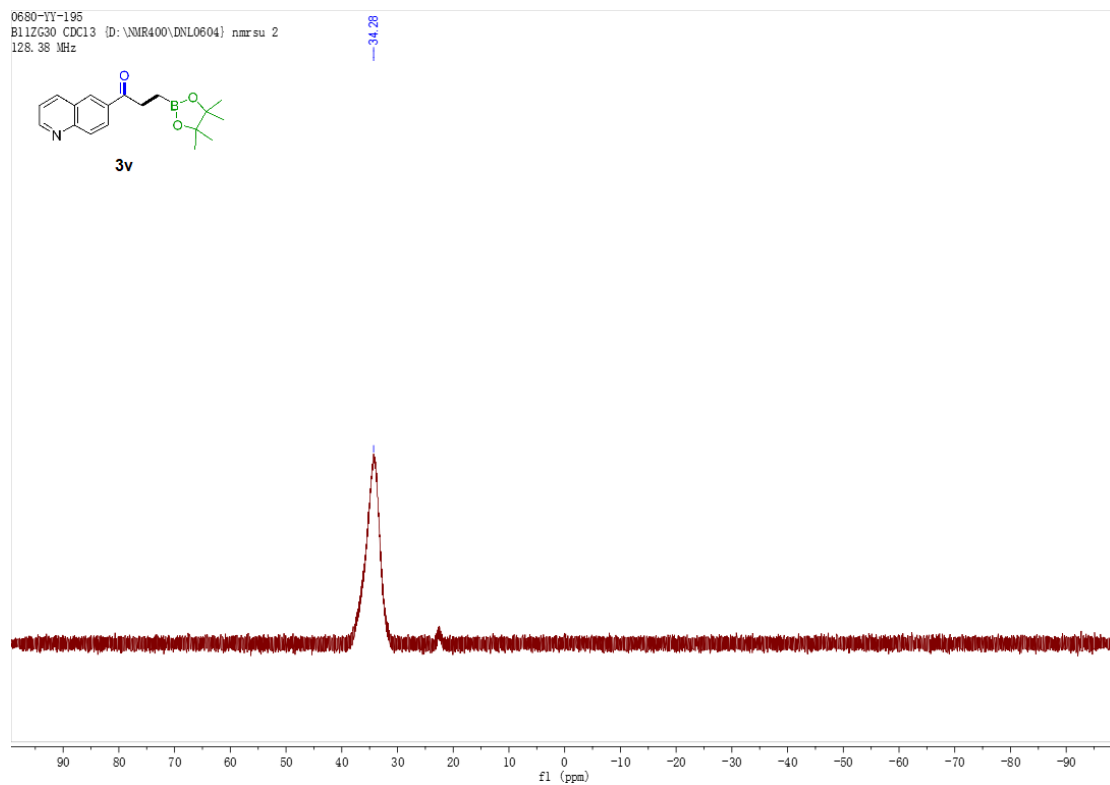

WT1650506422-1H-YY-203  
700.17 MHz

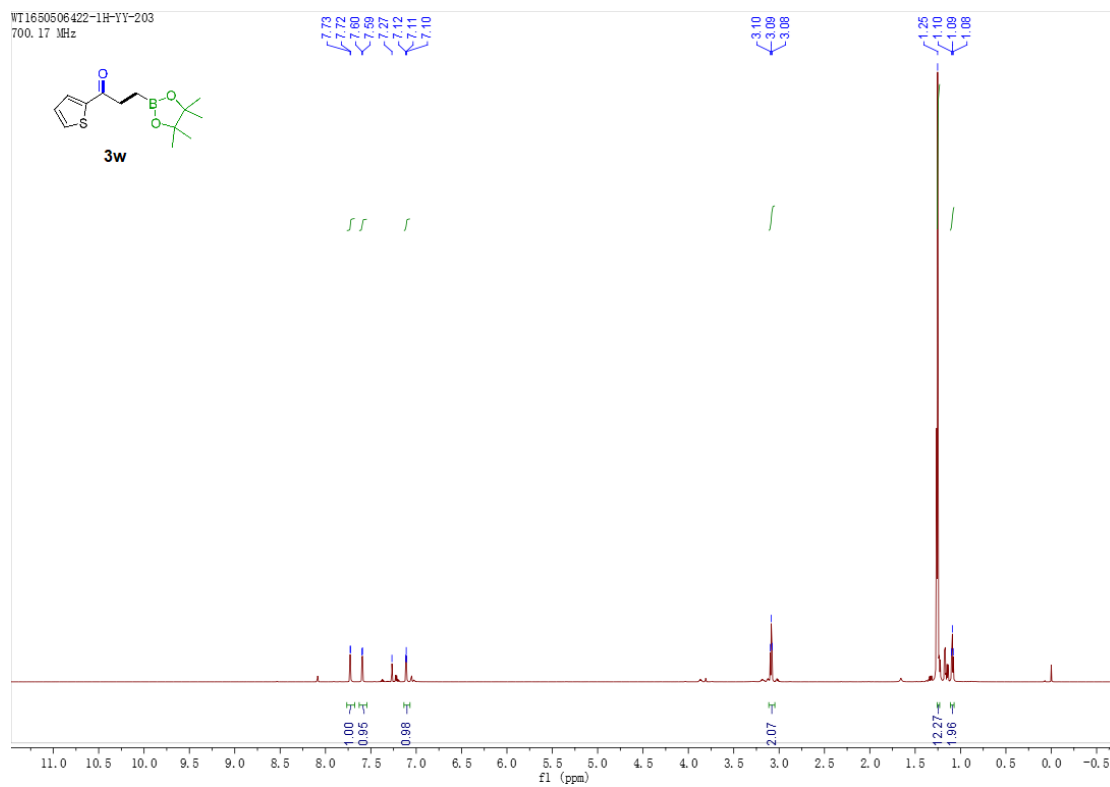

WT1650506422-13C-31-203  
176.06 MHz

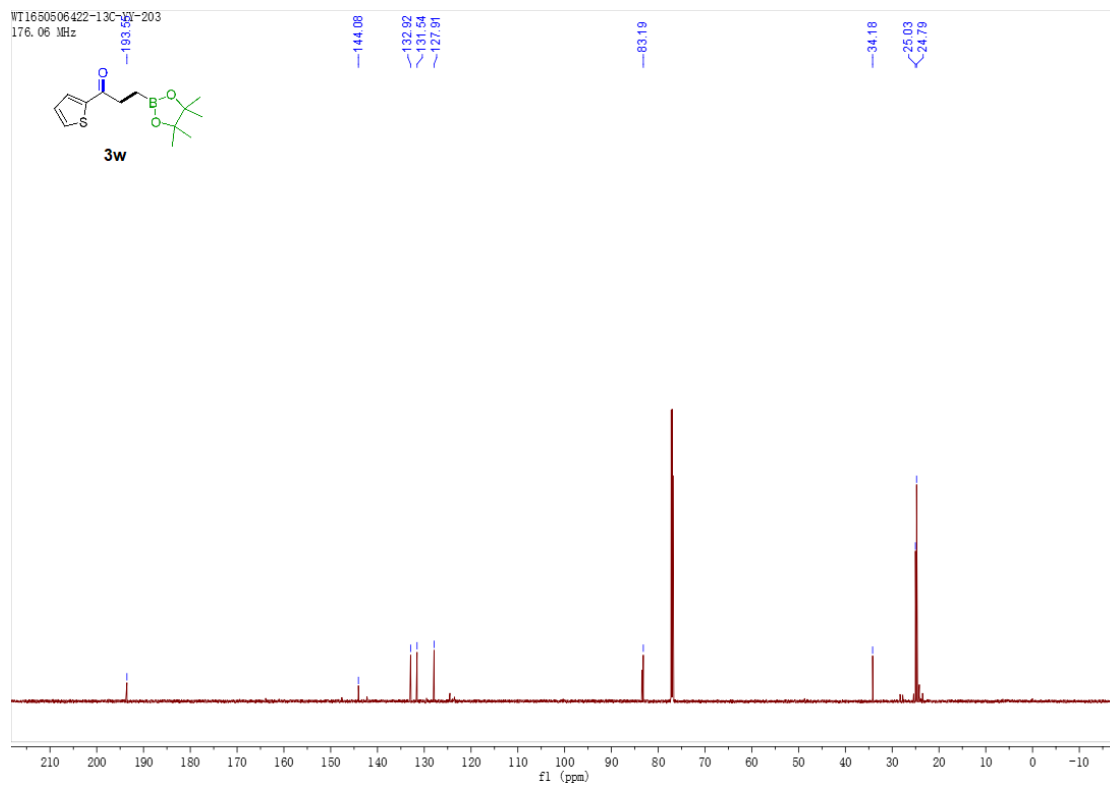

0692-1Y-203  
B11ZG30 CDCl3 [D:\NMR400\DNL0604] nmr su 17  
128.38 MHz

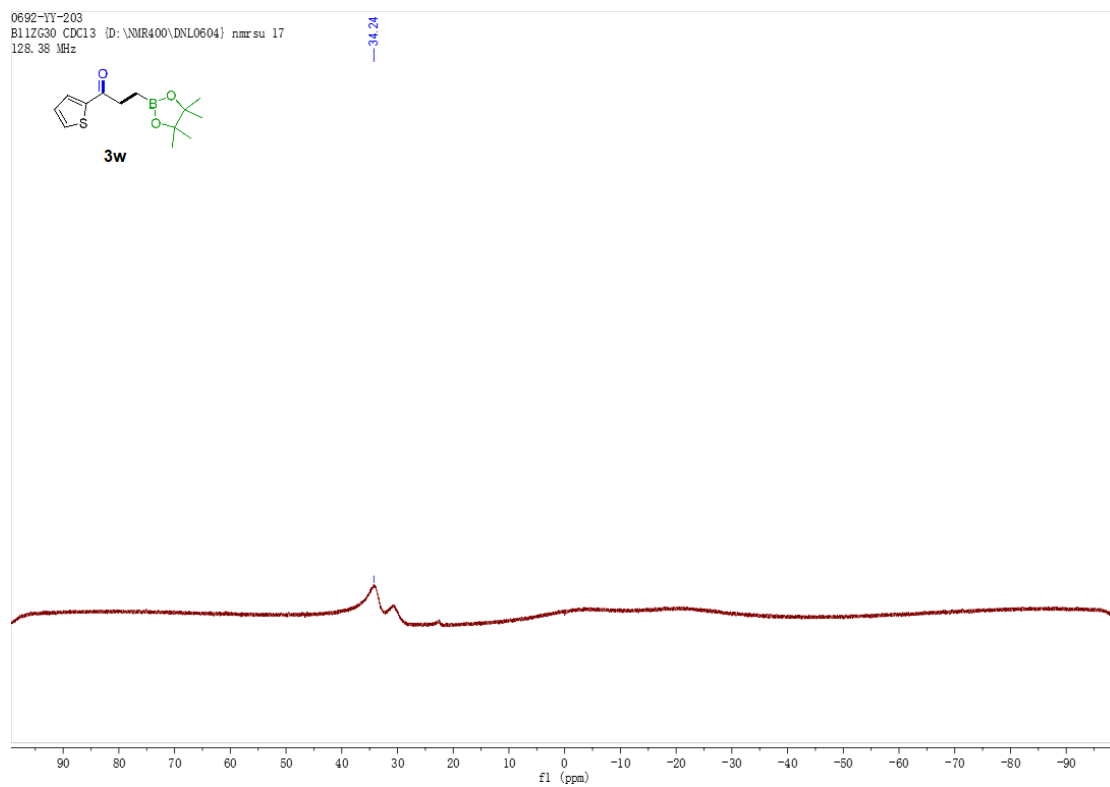

WT1650506422-1H-YY-205  
700.17 MHz

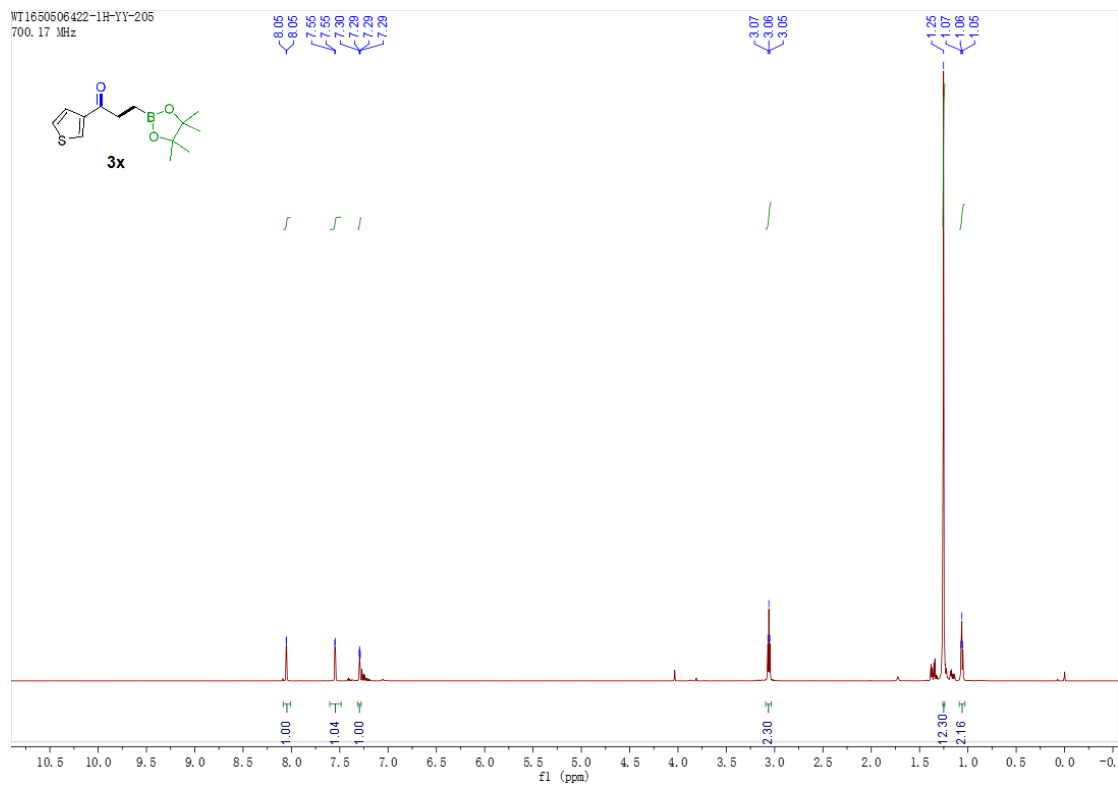

WT1650506422-13C-YY-205  
176.06 MHz

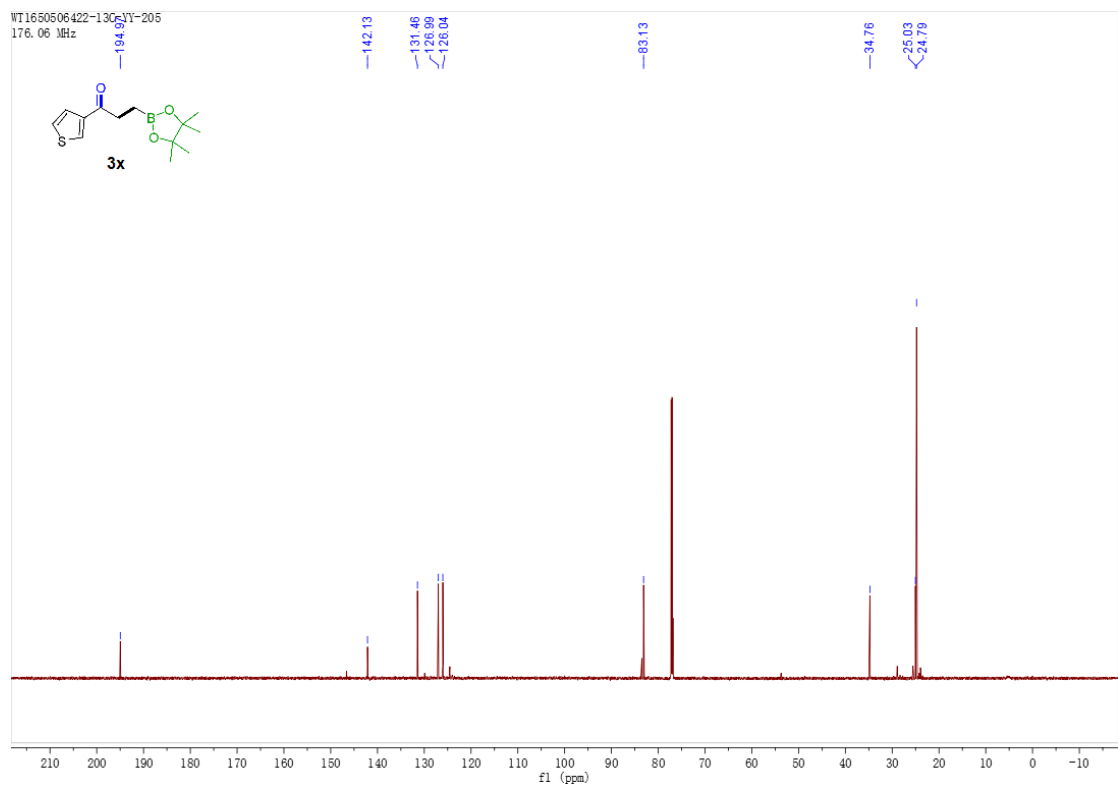

0692-YY-205  
B11ZG30 CDCl3 [D:\NMR400\DNL0604] nmrsu 18  
128.38 MHz

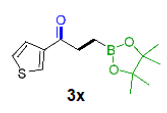

-34.17

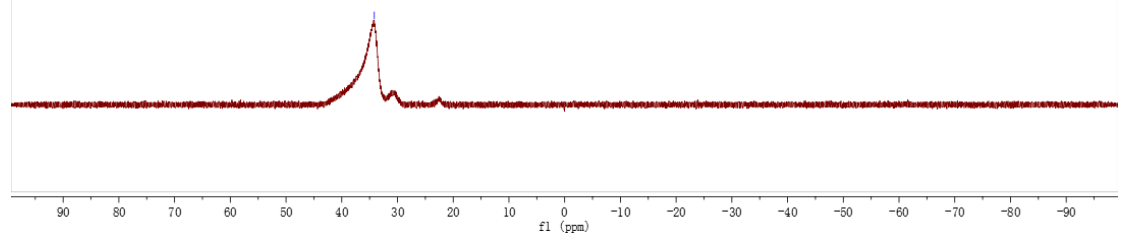

WT1650506422-1H-YY-172  
700.17 MHz

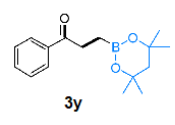

7.97  
7.96  
7.96  
7.54  
7.53  
7.51  
7.46  
7.44  
7.43  
7.28

3.08  
3.07  
3.06

1.80

1.29  
1.01  
1.00  
0.99

∫

∫

∫

∫

∫

∫

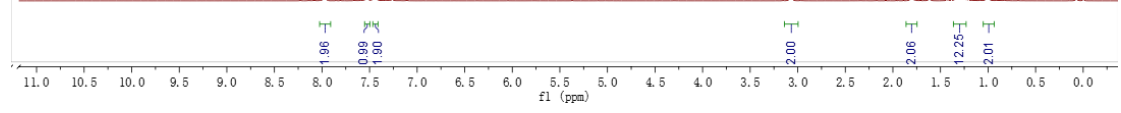

WT1650506422-13C-YY-172  
176.06 MHz

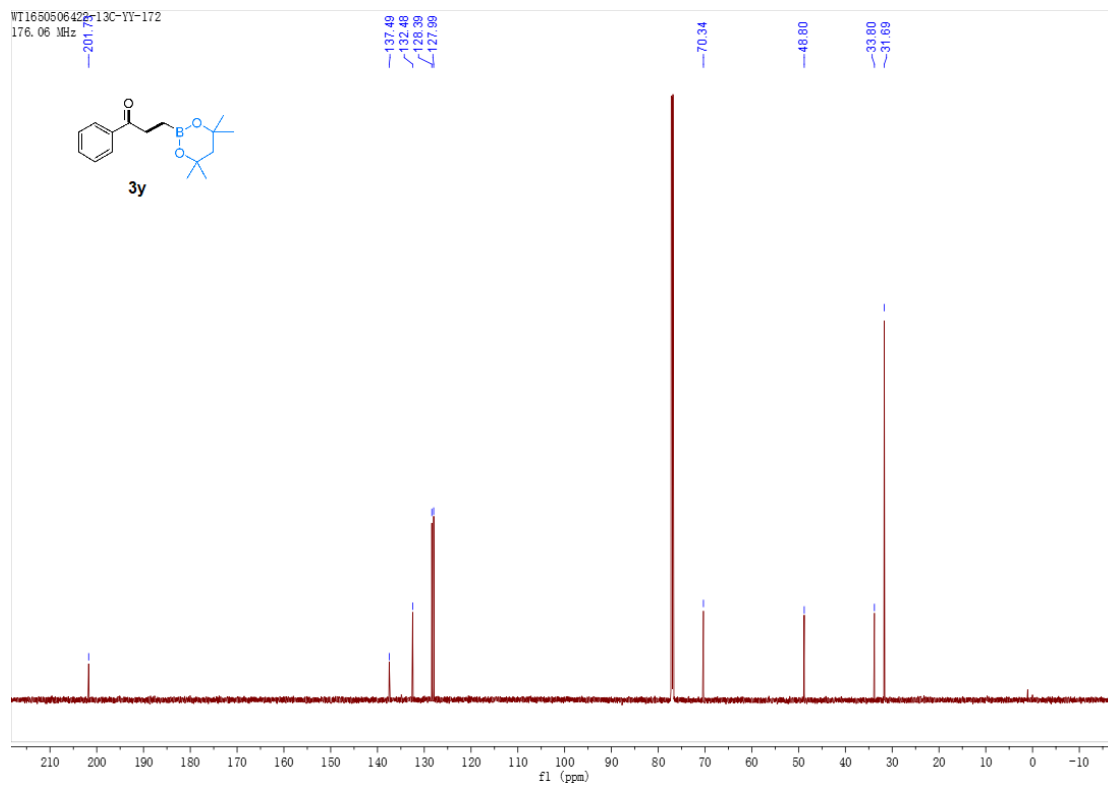

0692-YY-172  
B11ZG30 CDCl3 [D:\NMR400\DNL0604] nmr su 5  
128.38 MHz

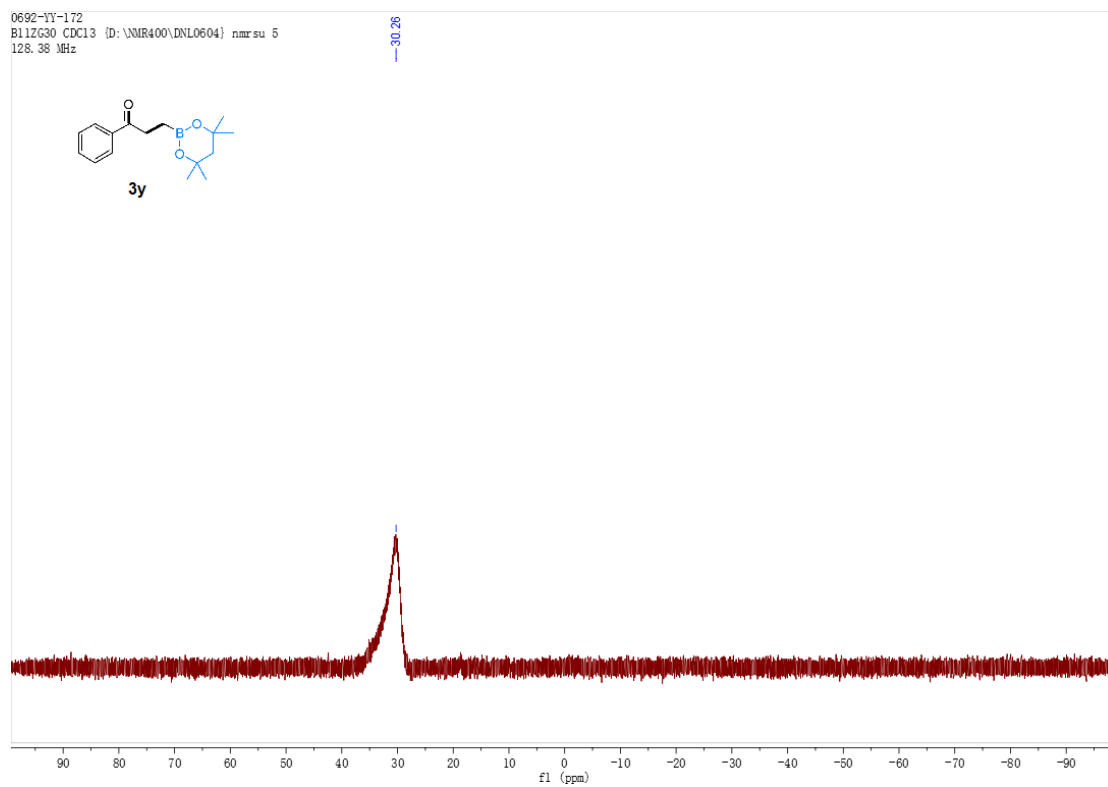

WT1650852043-1H-YY-211-1  
700.17 MHz

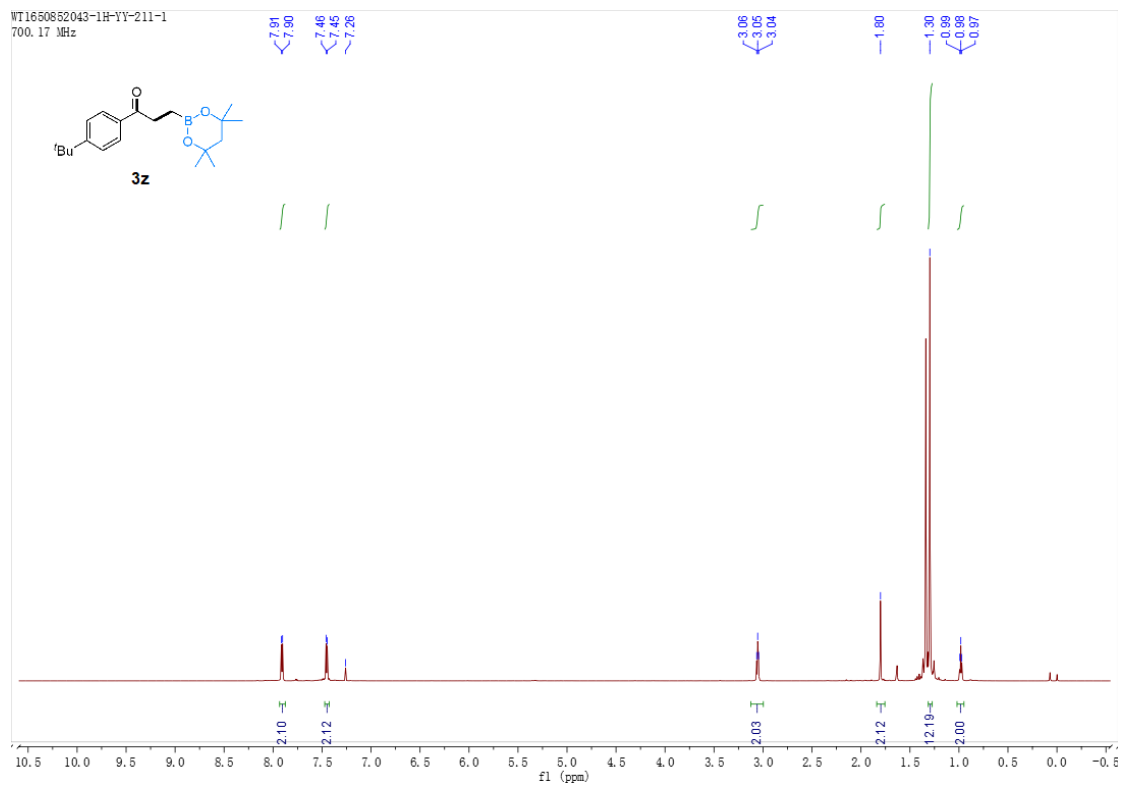

WT1650852043-13C-YY-211-1  
176.06 MHz

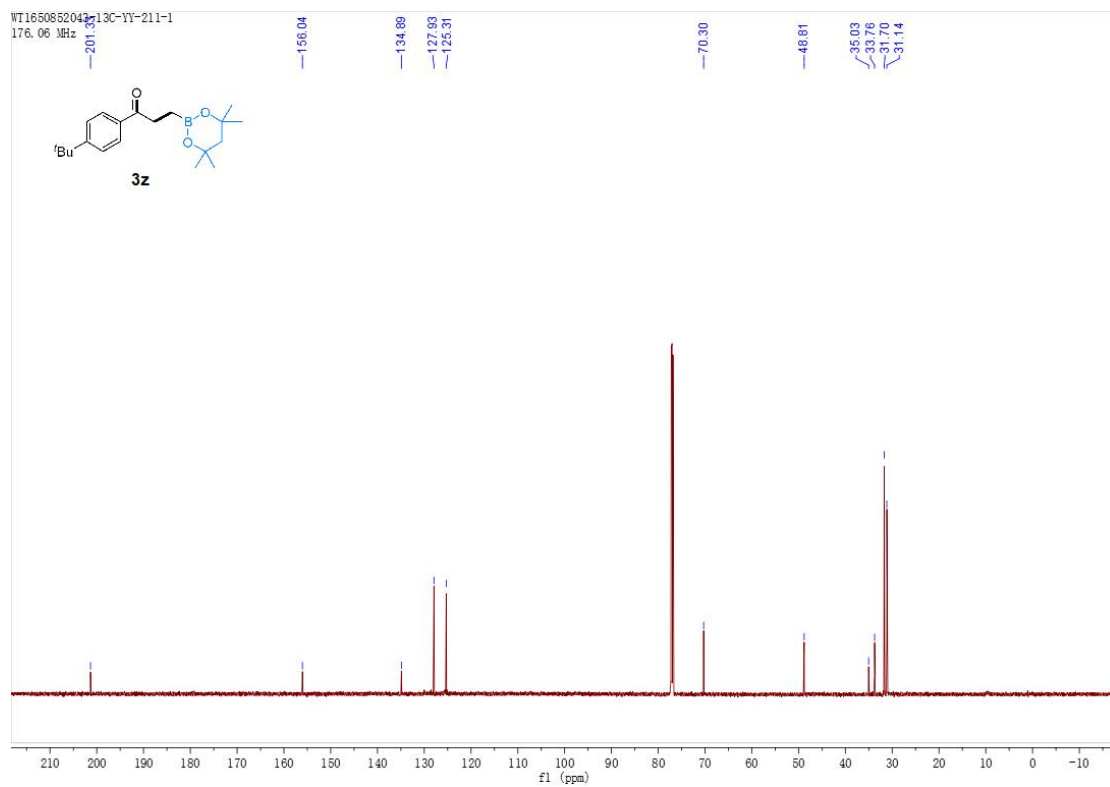

0692-YY-211-1  
B11ZG30 CDCl3 [D:\NMR400\DNL0604] nmrsu 21  
128.38 MHz

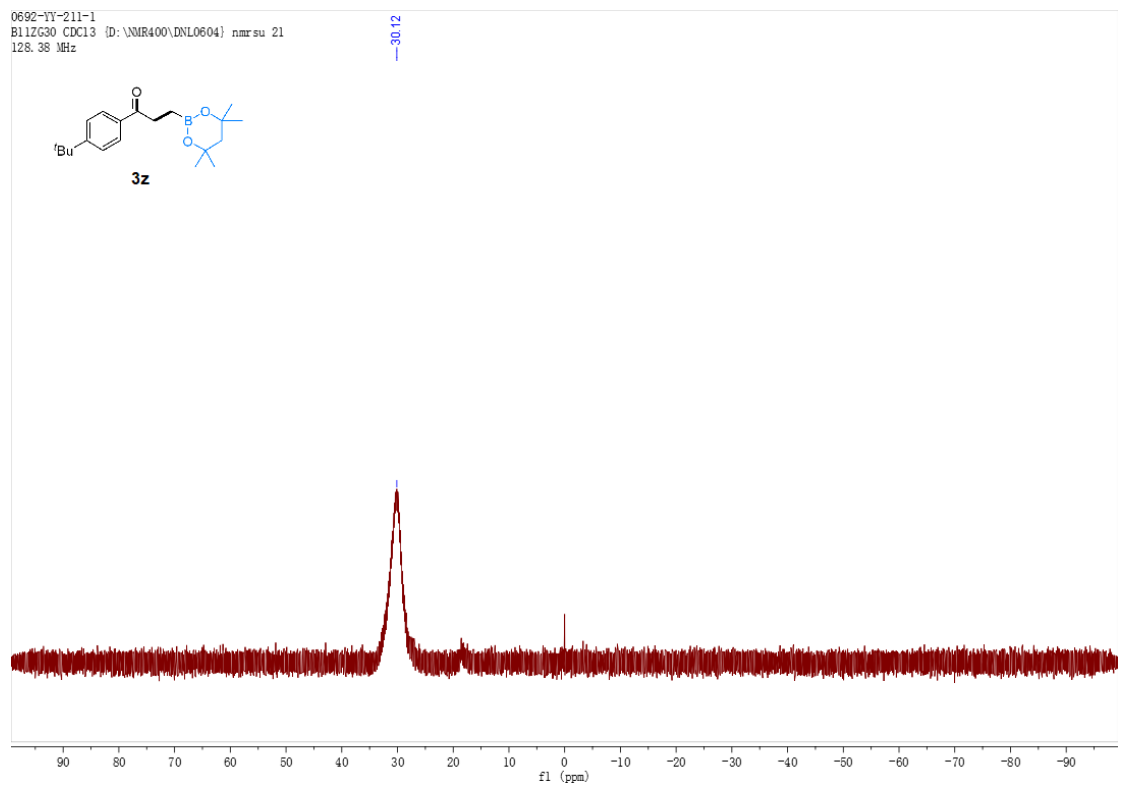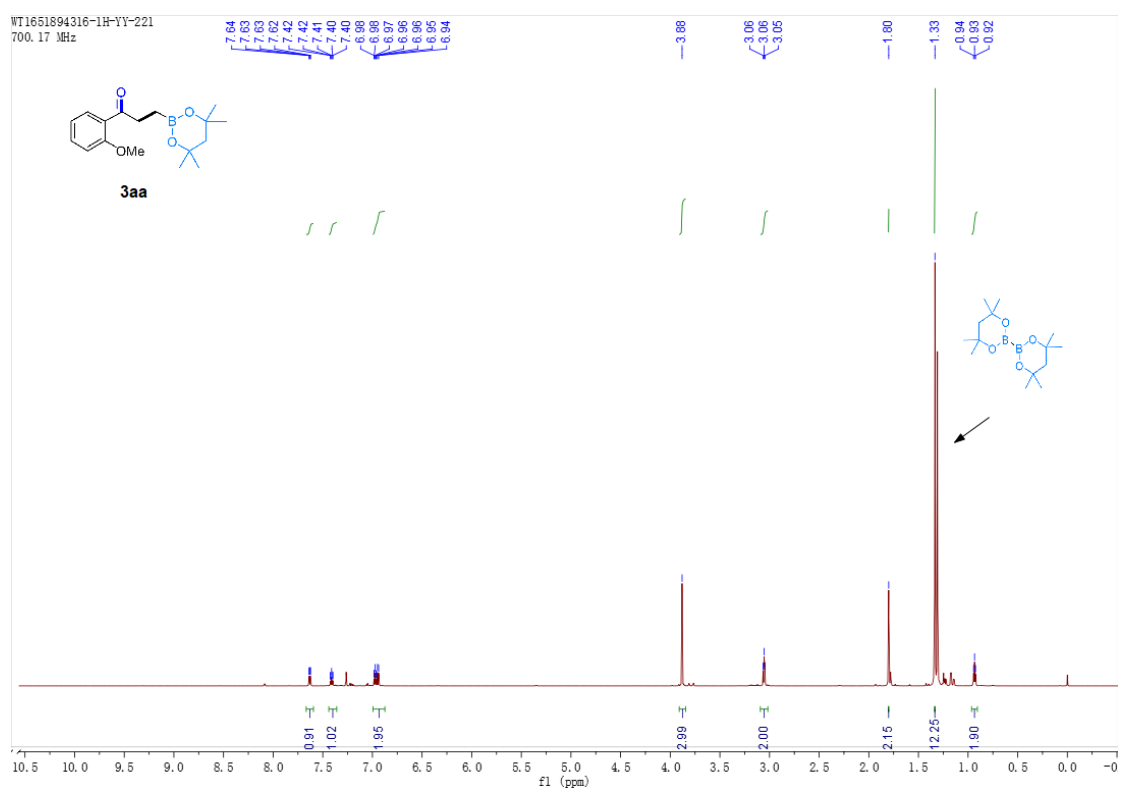



WT1651894316-13C-YY-221  
176.06 MHz

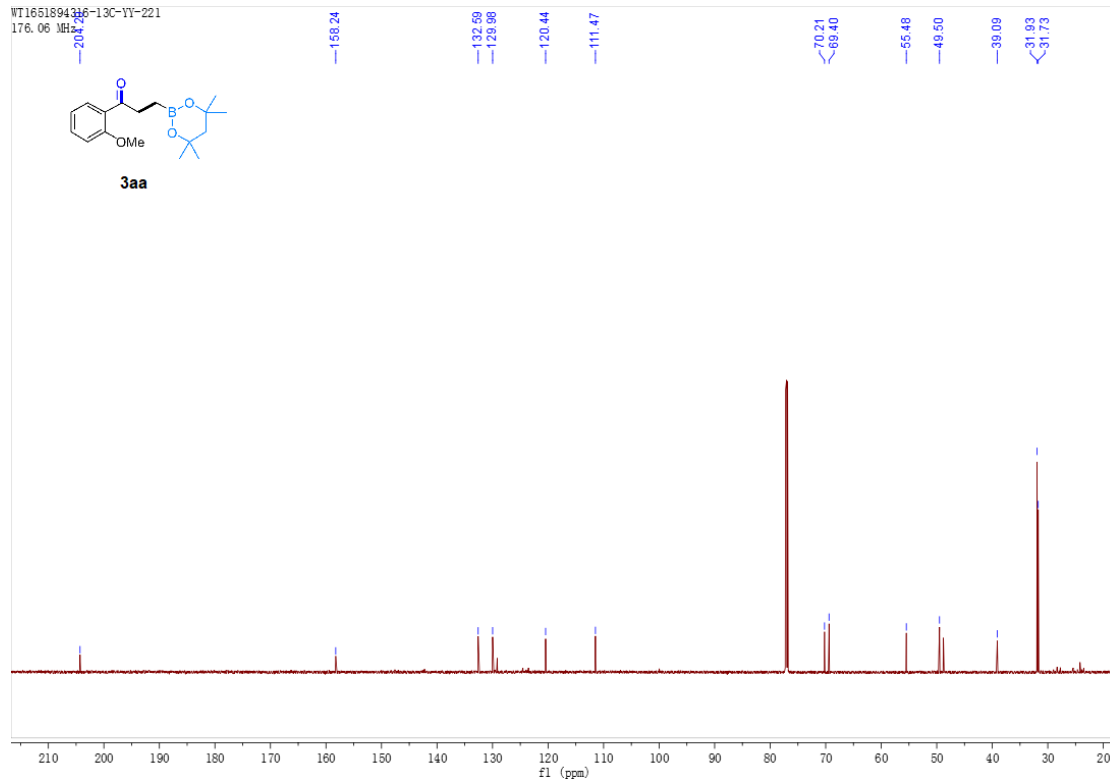

0692-YY-221  
B11ZG30 CDCl3 [D:\NMR400\DNL0604] nmr su 27  
128.38 MHz

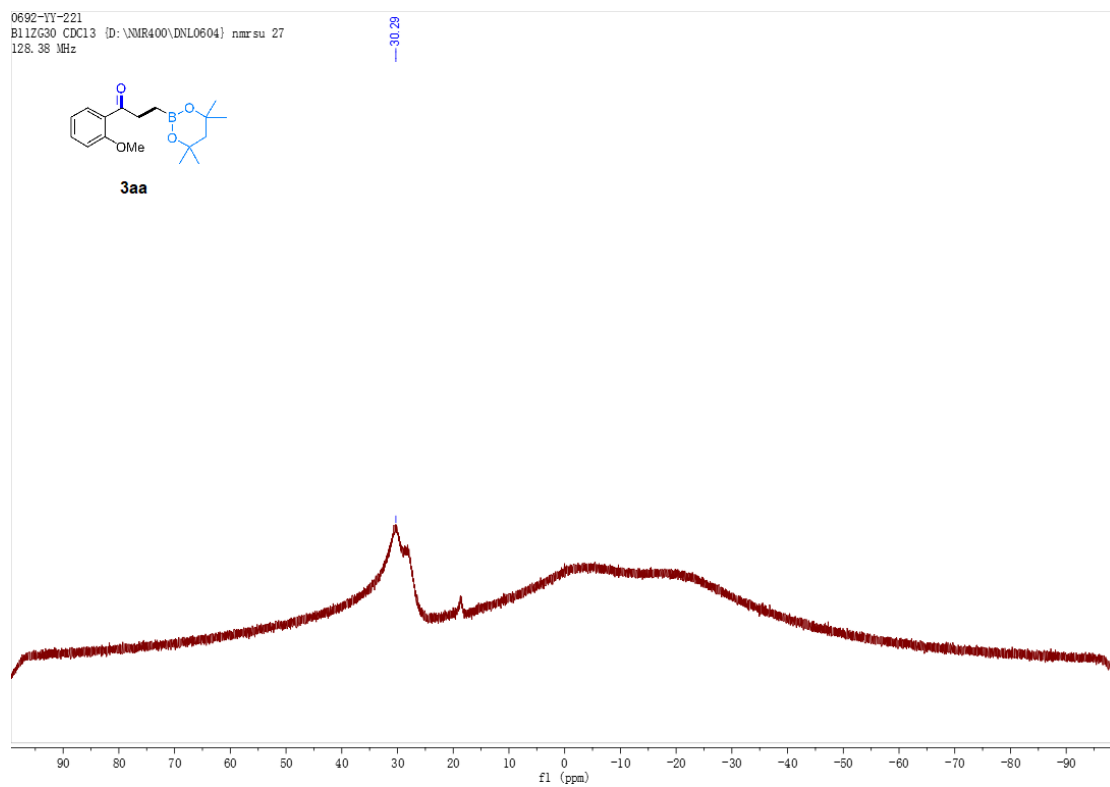

WT1650852043-1H-YY-213-1  
700.17 MHz

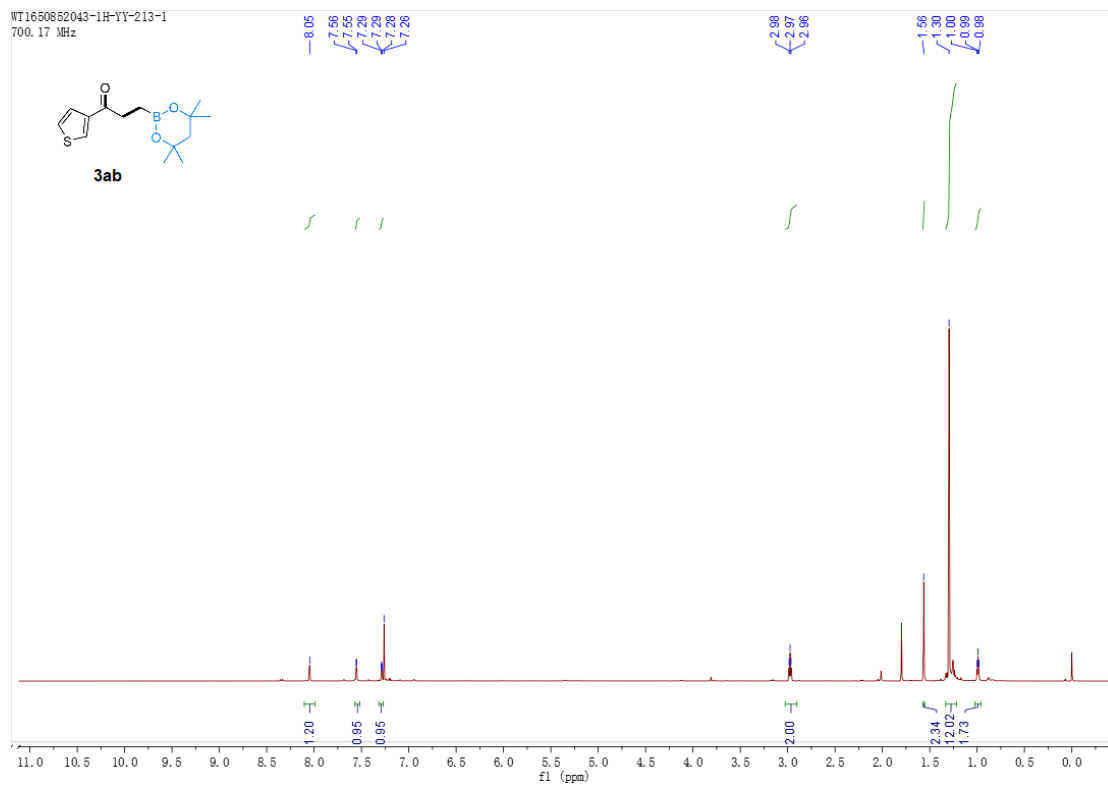

WT1650420011-13C-YY-213  
176.06 MHz

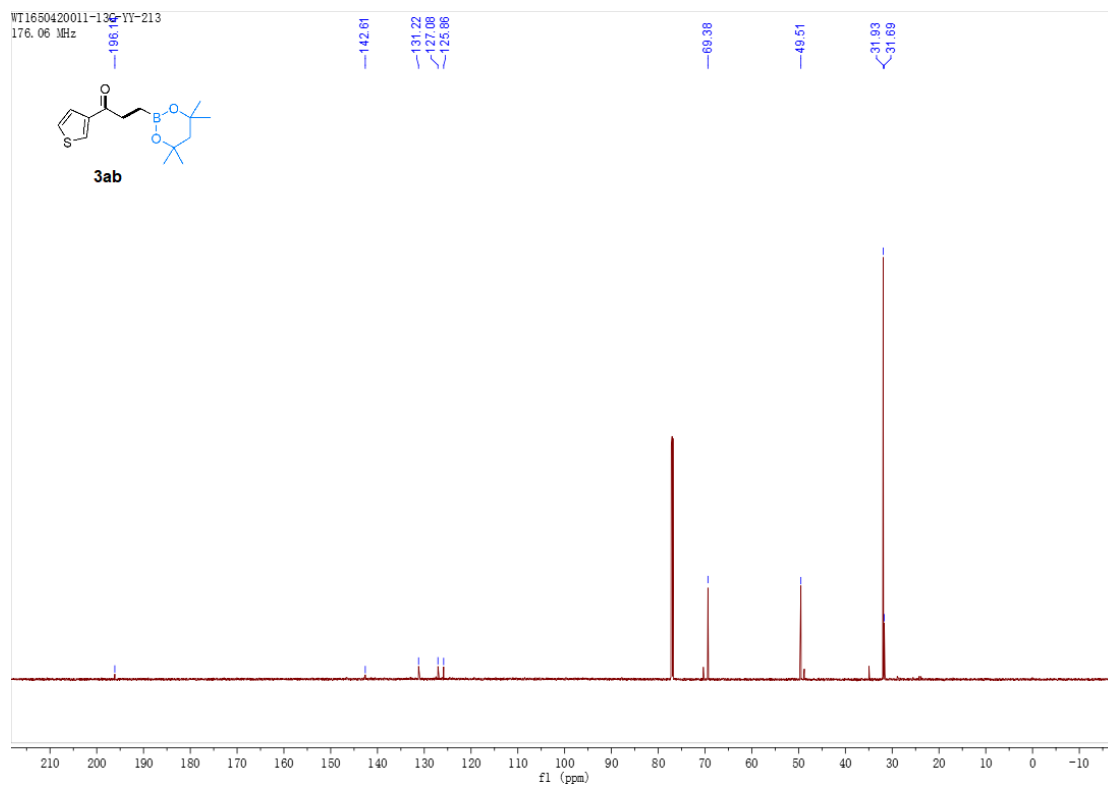

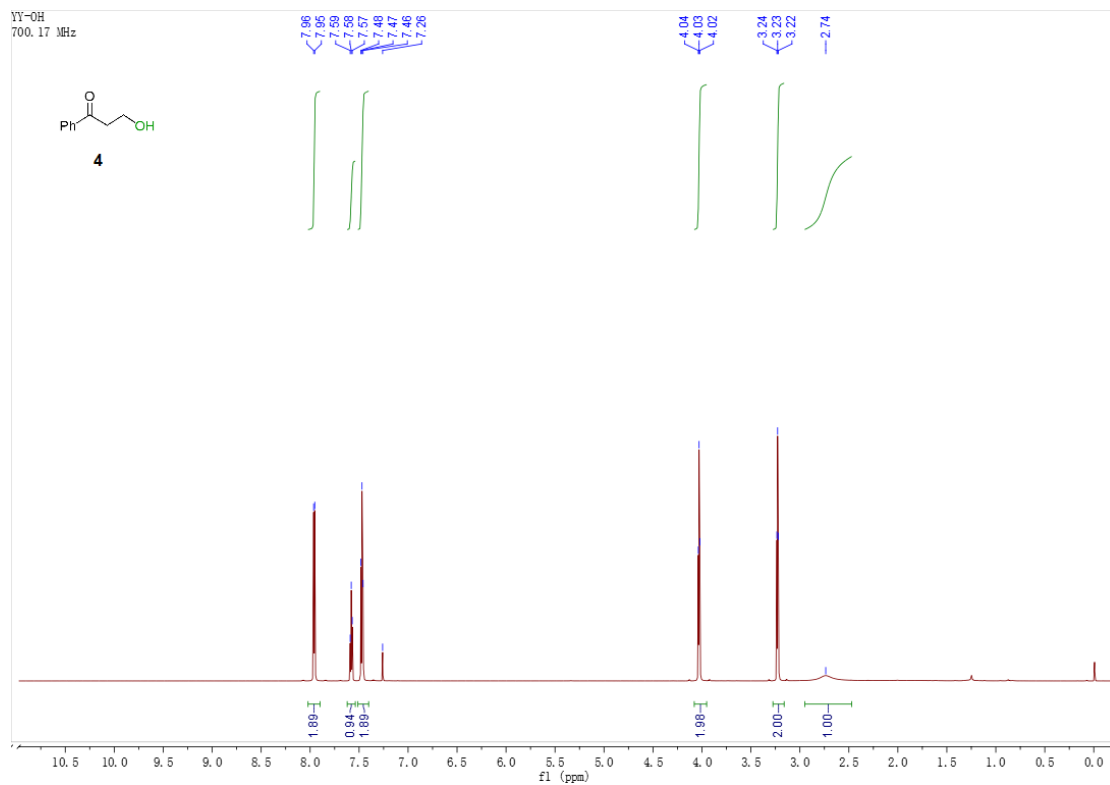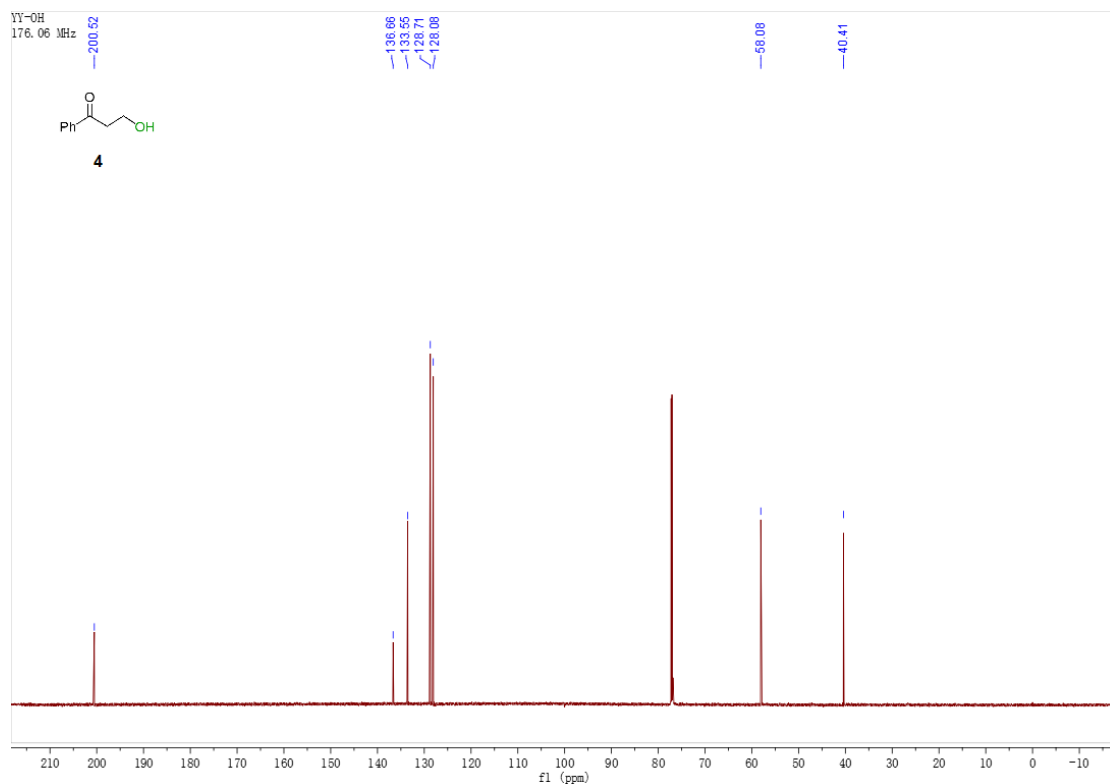

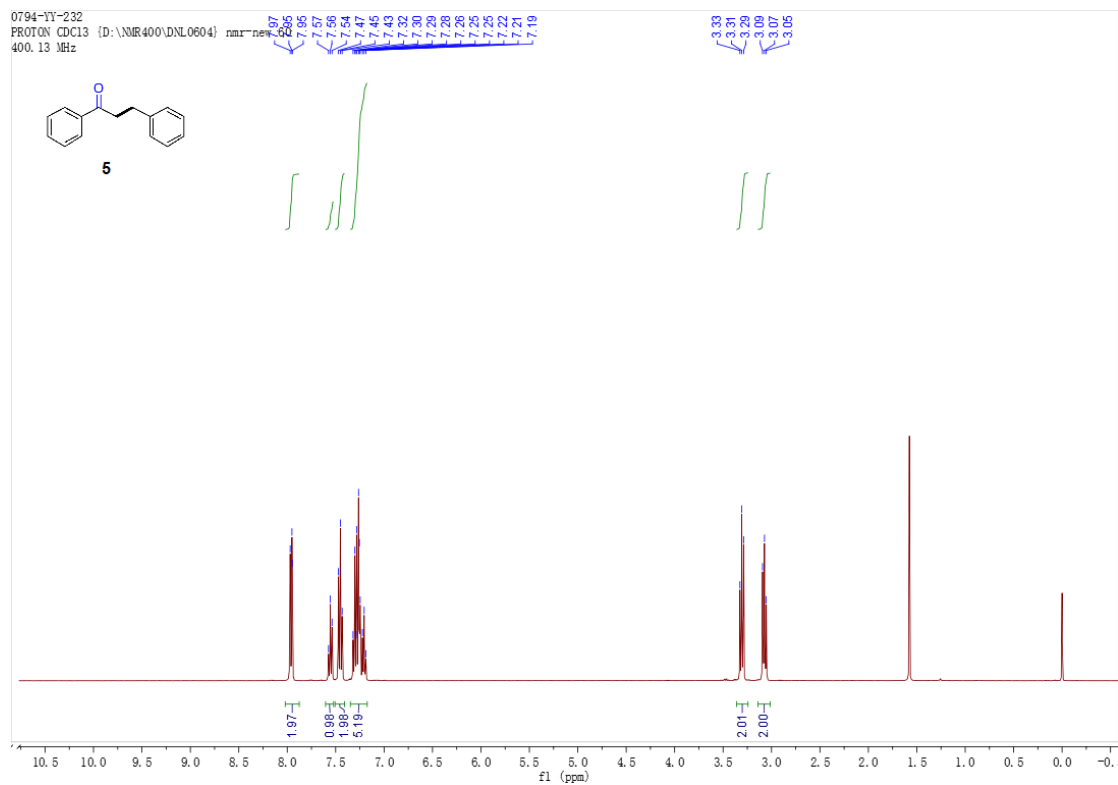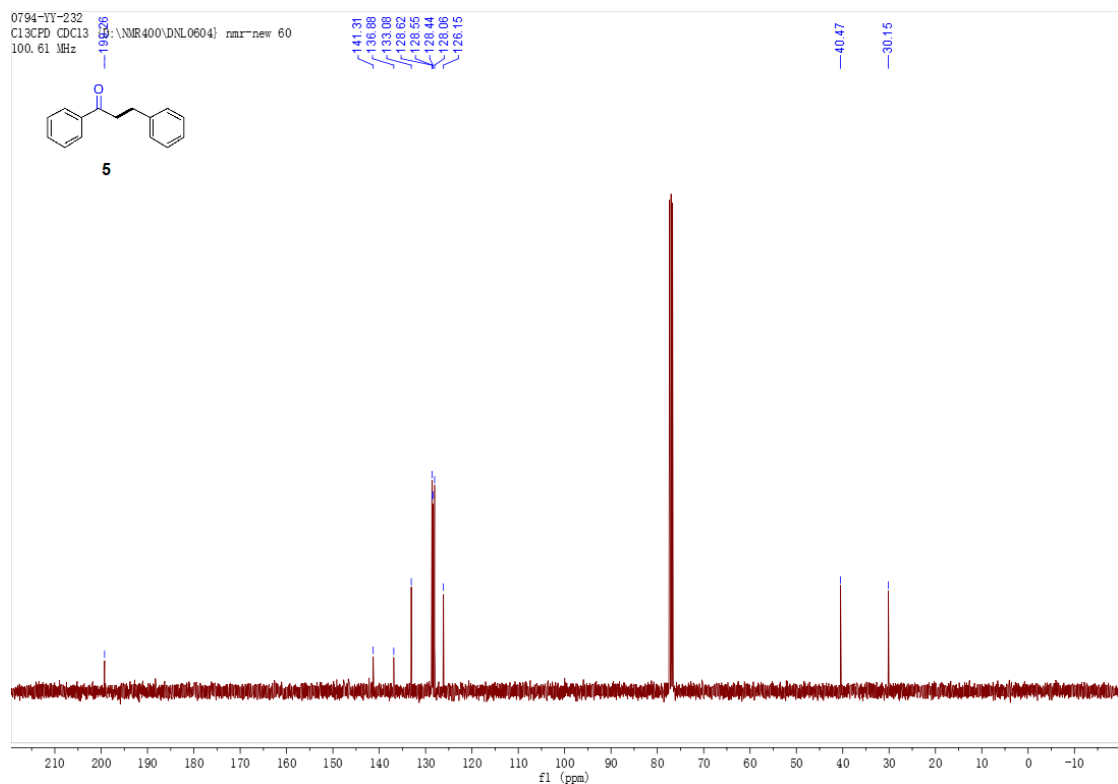

Supplement: d2cc04907d1.pdf [file d2cc04907d1.pdf]
